# Supplementary material for: Mild diazenylation of Csp2–H and Csp3–H bonds via arylazo sulfones
Source: Royal Society of Chemistry journal article supplement (doi:10.1039/d3qo01425h), 2023-01-01
Supplement: d3qo01425h1.pdf [file d3qo01425h1.pdf]

## Supplementary Information

### Mild diazenylation of C<sub>sp2</sub>-H and C<sub>sp3</sub>-H bond via arylazo sulfones

Yulei Zhao,<sup>\*a</sup> Shuai Li,<sup>a</sup> Yuhang Fan,<sup>a</sup> Chao Chen,<sup>a</sup> Xiaotong Dong,<sup>a</sup> Ruiqing Wang,<sup>a</sup> and Yuan-Ye Jiang<sup>\*a</sup>

<sup>a</sup> Key Laboratory of Life-Organic Analysis of Shandong Province, Key Laboratory of Green Natural Products and Pharmaceutical Intermediates in Universities of Shandong Province, Key Laboratory of Catalytic Conversion and Clean Energy in Universities of Shandong Province, School of Chemistry and Chemical Engineering, Qufu Normal University, P. R. China.

\*Correspondence: [ylzhao@qfnu.edu.cn](mailto:ylzhao@qfnu.edu.cn) (Yulei Zhao)

\*Correspondence: [yuanyejiang@qfnu.edu.cn](mailto:yuanyejiang@qfnu.edu.cn) (Yuan-Ye Jiang)

| <b>Contents:</b>                                                                                            | <b>Page</b> |
|-------------------------------------------------------------------------------------------------------------|-------------|
| General Information                                                                                         | S3          |
| Optimization studies of solvent for the synthesis of <b>3a</b>                                              | S4          |
| Optimization studies for the synthesis of <b>5a</b>                                                         | S5-S6       |
| Unexpected discoveries and corresponding control experiments                                                | S7          |
| General procedure for the synthesis of <b>3</b>                                                             | S8          |
| General procedure for the synthesis of <b>5</b>                                                             | S9          |
| Scale-up Reaction                                                                                           | S10         |
| Synthesis and characterization of <b>10a</b>                                                                | S11         |
| Possible ring-opening mechanism                                                                             | S12         |
| Mechanistic experiment                                                                                      | S13         |
| X-ray crystal structure of <b>3o</b>                                                                        | S14-S15     |
| X-ray crystal structure of <b>10a</b>                                                                       | S16-S17     |
| Calculated relative solution-phase Gibbs free energies of unfavorable mechanisms of <b>1a</b> and <b>2a</b> | S18         |
| The possible mechanism of arylation for other aromatic compounds                                            | S18         |
| Detail descriptions for products <b>3</b>                                                                   | S19-S32     |
| Detail descriptions for products <b>5</b>                                                                   | S33-S39     |
| Calculated energies and details of optimized structures                                                     | S40-S73     |
| NMR spectra                                                                                                 | S74-S121    |
| References                                                                                                  | S122-S125   |

## General Information

All glassware was oven dried at 100 °C for hours and cooled down under vacuum. Solvents were obtained from commercial sources. All the starting materials (including arylazo sulfones,<sup>1-2</sup> phenolic derivatives, indole derivatives, pyrrole derivatives,<sup>3</sup> Octabenzene, Estrone, 1,3-dicarbonyl compounds,<sup>4-8</sup> etc.) were obtained from commercial sources or synthesized according to literature methods (>95% purity). The thin layer chromatography (TLC) employed glass 0.25 mm silica gel plates. Purification of reaction products was carried out by flash chromatography on silica gel (300~400 mesh). <sup>1</sup>H NMR spectra were recorded at 500 or 400 MHz, <sup>13</sup>C NMR spectra were recorded at 125 or 100 MHz, and in CDCl<sub>3</sub> or DMSO-*d*<sub>6</sub> (containing 0.03% TMS) solutions with Bruker Advance III spectrometers. <sup>1</sup>H NMR spectra were recorded with Me<sub>4</sub>Si ( $\delta = 0.00$ ), CDCl<sub>3</sub> ( $\delta = 7.26$ ) or DMSO-*d*<sub>6</sub> ( $\delta = 2.50$ ) as the internal reference and <sup>13</sup>C NMR spectra were recorded with CDCl<sub>3</sub> ( $\delta = 77.16$ ) or DMSO-*d*<sub>6</sub> ( $\delta = 39.52$ ) as the internal reference. High-resolution mass spectra were obtained using a Bruker Maxis Impact mass spectrometer with a TOF (for ESI) analyzer.

All density functional theory (DFT) calculations were performed with Gaussian09 program,<sup>9</sup> M06-2X method,<sup>10</sup> SMD solvation model<sup>11</sup> (*N,N*-dimethylformamide and ethanol were used as solvent for the reactions of **4a** and **2a** respectively) associated with a (99,590) grid. Geometry optimization, frequency analysis and intrinsic reaction coordinate (IRC) analysis<sup>12</sup> were performed with 6-31G(d) basis set. Based on the solution-phase optimized structures, solution-phase single-point energy calculation was performed with 6-311++G(d,p) basis set. No imaginary frequency was found for energetic minima while only one imaginary frequency was found for transition states. IRC analysis was performed to ensure that the optimized transition states connect with correct intermediates. The thermodynamic correction to Gibbs free energy ( $\Delta G_{cor}$ ), solution-phase single-point energy ( $\Delta E_{sol}$ ) and an extra 1.89 kcal/mol which accounts for the standard state change from 1 atm. to 1 M at 298.15 K<sup>13-15</sup> were added up to get the solution-phase Gibbs free energy of every species ( $\Delta G_{sol}$ ) referring to 1 M and 298.15 K.

**Table S1** Optimization studies of solvent for the synthesis of **3a**<sup>a</sup>

Reaction scheme: **1a** (0.5 mmol) + **2a** (1.3 eq.)  $\xrightarrow[\text{solvent, 50 } ^\circ\text{C}]{\text{Cs}_2\text{CO}_3 \text{ (1.3 eq.)}}$  **3a**

| entry    | solvent     | time          | yield (%) |
|----------|-------------|---------------|-----------|
| 1        | THF         | 4 h           | 73        |
| 2        | MeCN        | 3 h           | 75        |
| 3        | DMF         | 2 h           | 30        |
| 4        | DCE         | 1 h           | 85        |
| 5        | EtOAc       | 8 h           | 69        |
| 6        | PhMe        | 6 h           | 60        |
| 7        | MeOH        | 15 min        | 92        |
| <b>8</b> | <b>EtOH</b> | <b>15 min</b> | <b>92</b> |

<sup>a</sup> **1a** (92 mg, 0.5 mmol), PhOH (61 mg, 0.65 mmol), Cs<sub>2</sub>CO<sub>3</sub> (212 mg, 0.65 mmol), solvent (5 mL), 50 °C, in air.

The solvent has a significant effect on the substitution-arylation reaction. Tetrahydrofuran (THF), acetonitrile (MeCN), *N,N*-dimethylformamide (DMF), 1,2-dichloroethane (DCE), ethyl acetate (EtOAc), or toluene (PhMe) can also be used in this reaction, but the yield is not as good as that of alcohol (e.g., EtOH or MeOH) as the solvent. This outcome may be attributed to the solubility of the alcohol solvent towards the reagents and potential hydrogen bonding interactions.

**Table S2** Optimization studies for the synthesis of **5a**<sup>a</sup>

COC(=O)C1Cc2ccccc2C1=O + CN(C)C(=N)Nc1ccccc1
 $\xrightarrow[\text{solvent, in air, temperature, time}]{\text{base (y eq.)}}$ 
COC(=O)C1Cc2ccccc2C1=O

**4a** (0.3 mmol)      **1a** (x eq.)      **5a**

| entry     | x          | base                            | y          | solvent                    | temp. (°C) | time          | yield (%)       |
|-----------|------------|---------------------------------|------------|----------------------------|------------|---------------|-----------------|
| 1         | 1.3        | DABCO                           | 2.0        | DMF                        | 70         | 1 h           | 59              |
| 2         | 1.3        | DABCO                           | 2.0        | MeOH                       | 70         | 5 min         | 63              |
| 3         | 1.3        | DABCO                           | 2.0        | THF                        | 70         | 8 h           | 54              |
| 4         | 1.3        | DABCO                           | 2.0        | MeCN                       | 70         | 5 h           | 20              |
| 5         | 1.3        | DABCO                           | 2.0        | DCE                        | 70         | 5 h           | 48              |
| 6         | 1.3        | DABCO                           | 2.0        | PhMe                       | 70         | 5 h           | 24              |
| 7         | 1.3        | DABCO                           | 2.0        | DMSO                       | 70         | 30 min        | 49              |
| 8         | 1.3        | DABCO                           | 2.0        | DMF/H <sub>2</sub> O (5/1) | 70         | 15 min        | 57              |
| 9         | 1.3        | DABCO                           | 2.0        | EtOAc                      | 70         | 3 h           | 40              |
| 10        | 1.3        | pyridine                        | 2.0        | DMF                        | 70         | 5 h           | 53              |
| 11        | 1.3        | Et <sub>3</sub> N               | 2.0        | DMF                        | 70         | 30 min        | 47              |
| 12        | 1.3        | DBU                             | 2.0        | DMF                        | 70         | 10 min        | trace           |
| 13        | 1.3        | NaHCO <sub>3</sub>              | 2.0        | DMF                        | 70         | 40 min        | 71              |
| 14        | 1.3        | Cs <sub>2</sub> CO <sub>3</sub> | 2.0        | DMF                        | 70         | 30 min        | n.d.            |
| 15        | 1.3        | NaOH                            | 2.0        | DMF                        | 70         | 30 min        | 10              |
| 16        | 1.3        | KHCO <sub>3</sub>               | 2.0        | DMF                        | 70         | 30 min        | 70              |
| 17        | 1.3        | NaHCO <sub>3</sub>              | 1.5        | DMF                        | 70         | 40 min        | 30              |
| 18        | 1.3        | NaHCO <sub>3</sub>              | 2.5        | DMF                        | 70         | 40 min        | 61              |
| 19        | 1.3        | NaHCO <sub>3</sub>              | 3.0        | DMF                        | 70         | 40 min        | 25              |
| 20        | 1.3        | NaHCO <sub>3</sub>              | 2.0        | DMF                        | 70         | 40 min        | 73 <sup>b</sup> |
| <b>21</b> | <b>1.5</b> | <b>NaHCO<sub>3</sub></b>        | <b>2.0</b> | <b>DMF</b>                 | <b>70</b>  | <b>30 min</b> | <b>86</b>       |
| 22        | 1.1        | NaHCO <sub>3</sub>              | 2.0        | DMF                        | 70         | 30 min        | 60              |
| 23        | 0.9        | NaHCO <sub>3</sub>              | 2.0        | DMF                        | 70         | 30 min        | 57              |
| 24        | 1.5        | NaHCO <sub>3</sub>              | 2.0        | DMF                        | 90         | 15 min        | 60              |
| 25        | 1.5        | NaHCO <sub>3</sub>              | 2.0        | DMF                        | 50         | 1 h           | 71              |

<sup>a</sup> solvent (3 mL), in air, n.d. = no detected. <sup>b</sup> under N<sub>2</sub>.

The substitution-alkylation of arylazo sulfone **1a** has also been carefully investigated (Table S2). Through the solvent screening (entries 1-9), we found that methanol (MeOH) as the solvent, the best yield can be achieved within five minutes. However, MeOH as a solvent has a significant disadvantage, which is that MeOH will further participate in the reaction to produce the ring-opening products (for details, see the next page, Page S7). Based on the above investigation results, we finally decided to use DMF as a solvent for follow-up research. A number of common organic and inorganic bases could be used for this reaction (entries 10-16), of which sodium bicarbonate showed the best effect, with a yield of 71% to **5a** (entry 13). Subsequently, increasing or decreasing the dosage of NaHCO<sub>3</sub> was investigated (entries 17-19), but no better results were achieved than with 2-equivalent NaHCO<sub>3</sub>. If the reaction was carried out under N<sub>2</sub>, there was little difference from that under air, which indicates that the reaction is not sensitive to air. Next, we tried to optimize the amount of **1a** (entries 21-23). We found that the best reaction results were achieved when 1.5 equivalent **1a** was used (entry 21). Finally, we also investigated the reaction temperature and found that 70 °C was the best reaction temperature (entries 24 and 25 vs entry 21).

## Unexpected discoveries and corresponding control experiments

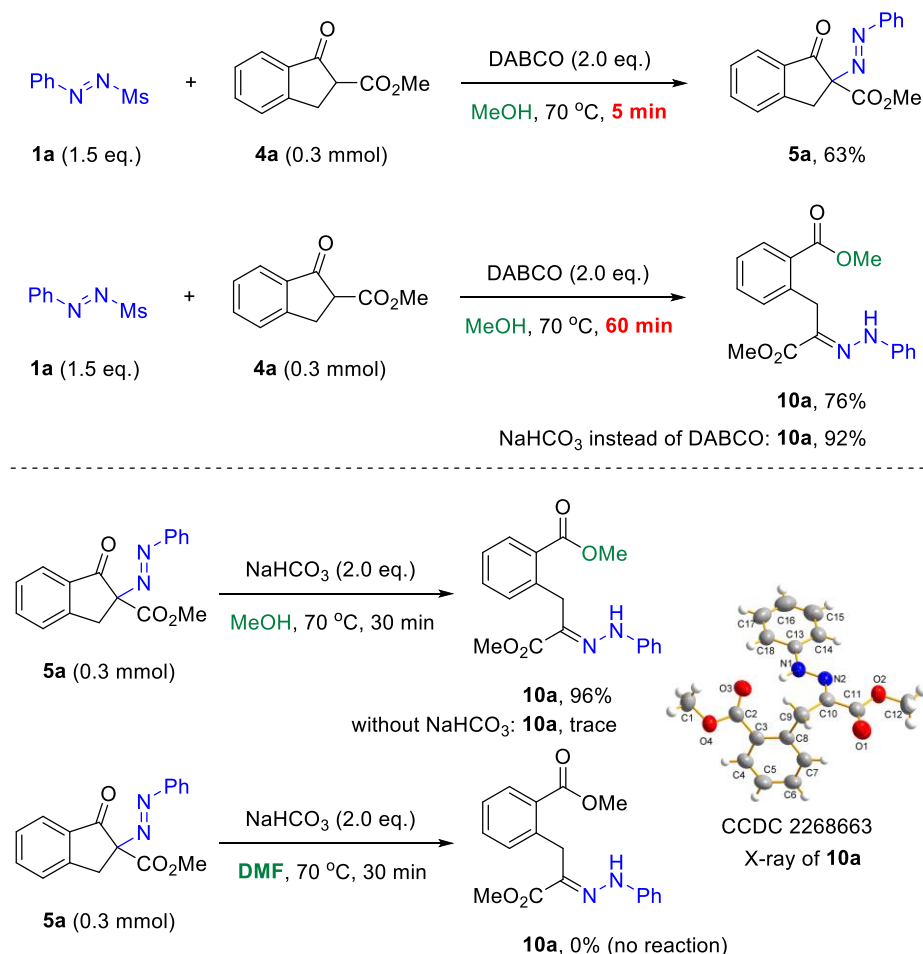

**Figure S1** Formation of hydrazone derivatives and the control experiments

When optimizing the reaction conditions for the alkylation of azo, an interesting ring-opening reaction was found (Figure S1). When methanol was used as the solvent, the alkylated azo **5a** can be rapidly generated within minutes (5 min, 63%). However, when the reaction time was prolonged, the azo product **5a** was gradually transformed into the ring-opening product **10a** (60 min, 76%; the yield increased to 92% after the DABCO was changed to  $\text{NaHCO}_3$ ). Control experiments have demonstrated the involvement of alcohol solvent in the reaction. Quantitative conversion of **5a** to **10a** can be achieved when methanol is utilized as the solvent, whereas no reaction occurs upon replacement of methanol with DMF. The present ring-opening reaction provides an intriguing pathway for the synthesis of hydrazone derivatives, which is being followed up in our laboratory.

### General procedure for the synthesis of **3**

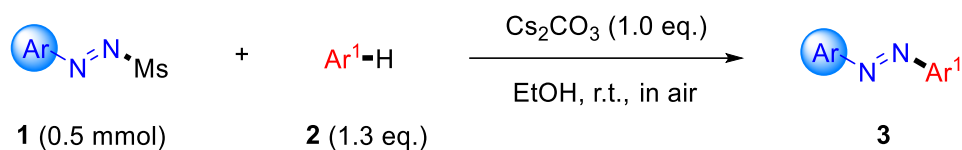

In an oven-dried bottle (25 mL) equipped with a stir bar, **1** (0.5 mmol), Cs<sub>2</sub>CO<sub>3</sub> (162.9 mg, 0.5 mmol), EtOH (5 mL) and **2** (0.65 mmol) were added. Then, the mixture was stirred at room temperature. After the reaction finished as monitored with TLC, the resulting mixture was concentrated under reduced pressure and pure product was obtained by flash column chromatography on silica gel (petroleum ether/ethyl acetate = 20:1–1:1).

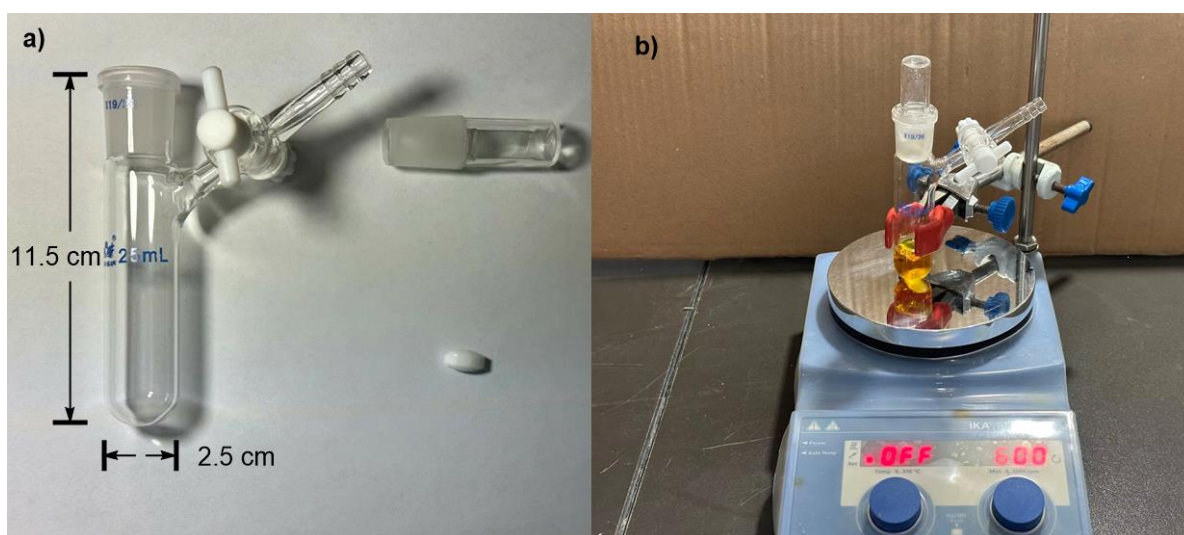

**Figure S2** Set-up of Experiments (the photographs come from our lab). a) Experimental equipment. b) Reaction process diagram.



## General procedure for the synthesis of 5

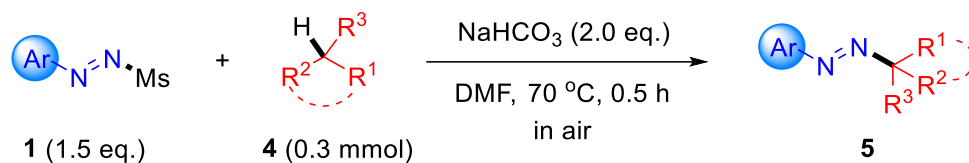

In an oven-dried bottle (25 mL) equipped with a stir bar, **4** (0.3 mmol), NaHCO<sub>3</sub> (50.4 mg, 0.6 mmol), DMF (3 mL) and **1** (0.45 mmol) were added. Then, the mixture was stirred in the 70 °C oil bath. After the reaction finished as monitored with TLC, the reaction mixture was washed with water and extracted with ethyl acetate (15 mL×3). The organic layers were combined, dried over Na<sub>2</sub>SO<sub>4</sub>, and concentrated in vacuum. The pure product was obtained by flash column chromatography on silica gel (petroleum ether:ethyl acetate = 15:1-3:1).

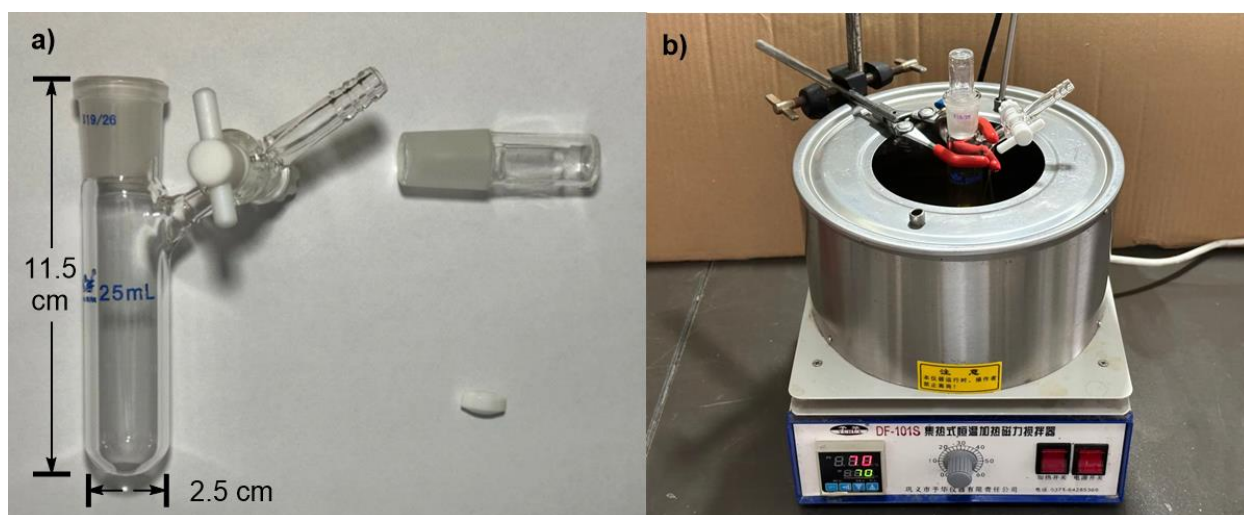

**Figure S3** Set-up of Experiments (the photographs come from our lab). a) Experimental equipment. b) Reaction process diagram.

## Scale-up Reaction

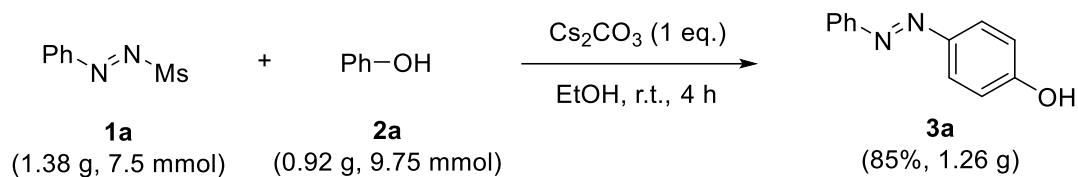

In an oven-dried bottle (250 mL) equipped with a stir bar, **1a** (1.38 g, 7.5 mmol),  $\text{Cs}_2\text{CO}_3$  (2.44 g, 7.5 mmol), EtOH (75 mL) and **2a** (0.92 g, 9.75 mmol) were added. Then, the mixture was stirred at room temperature for about 4 hours. After the reaction finished as monitored with TLC, the resulting mixture was concentrated under reduced pressure and the pure **3a** (84%, 1.26 g) was obtained by flash column chromatography on silica gel (petroleum ether/ethyl acetate = 10: 1).

Note: The corresponding experimental device is basically the same as Supplementary Figure 2, except that the volume of the reaction vessel increases correspondingly.

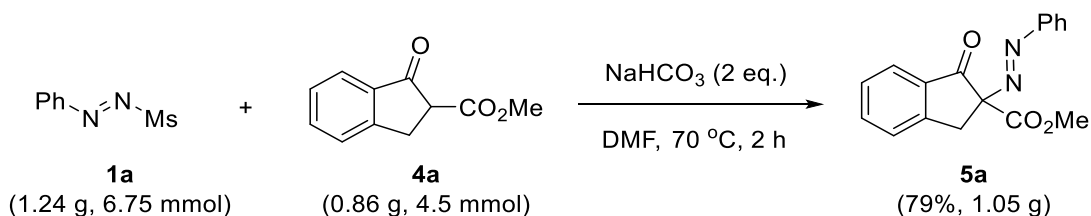

In an oven-dried bottle (250 mL) equipped with a stir bar, **4a** (0.86 g, 4.5 mmol),  $\text{NaHCO}_3$  (0.76 g, 9 mmol), DMF (45 mL) and **1a** (1.24 g, 6.75 mmol) were added. Then, the mixture was stirred in the 70 °C oil bath for about 2 hours. After the reaction finished as monitored with TLC, the reaction mixture was washed with water and extracted with ethyl acetate (50 mL $\times$ 3). The organic layers were combined, dried over  $\text{Na}_2\text{SO}_4$ , and concentrated in vacuum. The pure **5a** (79%, 1.05 g) was obtained by flash column chromatography on silica gel (petroleum ether: ethyl acetate = 10:1).

Note: The corresponding experimental device is basically the same as Supplementary Figure 3, except that the volume of the reaction vessel increases correspondingly.

## Synthesis and characterization of hydrazine 10a

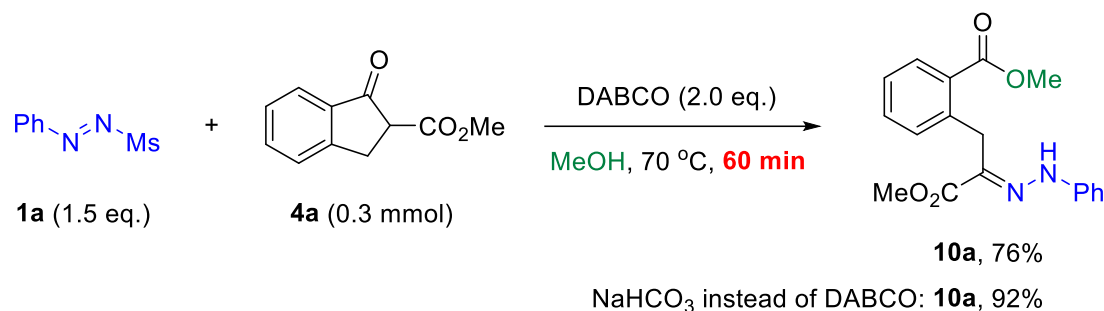

In an oven-dried seal tube (25 mL) equipped with a stir bar, **4a** (57.0 mg, 0.3 mmol), DABCO (67.3 mg, 0.6 mmol), MeOH (3 mL) and **1a** (82.9 mg, 0.45 mmol) were added. Then the vessel was sealed at atmospheric pressure of air and the resulting mixture was stirred in a 70 °C oil bath for 60 minutes. The resulting mixture was concentrated under reduced pressure and pure product **10a** (76%, 74.4 mg) was obtained by flash column chromatography on silica gel (petroleum ether: ethyl acetate = 12:1). Note: When DABCO is replaced with NaHCO<sub>3</sub>, the yield of **10a** can be increased to 92% (90.1 mg).

### Methyl (*E*)-2-(3-methoxy-3-oxo-2-(2-phenylhydrazineylidene)propyl)benzoate (**10a**).

Compound **10a** was prepared in 76% yield (74 mg) according to the general procedure.  $R_f$  = 0.2 (petroleum ether/ethyl acetate = 12/1); Yellow solid; mp 89-91 °C; <sup>1</sup>H NMR (500 MHz, CDCl<sub>3</sub>): δ 10.47 (s, 1H), 7.83-7.81 (m, 1H), 7.54-7.52 (m, 1H), 7.45-7.42 (m, 1H), 7.28-7.26 (m, 1H), 7.25-7.19 (m, 4H), 6.93-6.89 (m, 1H), 4.31 (s, 2H), 4.04 (s, 3H), 3.94 (s, 3H); <sup>13</sup>C NMR (125 MHz, CDCl<sub>3</sub>): δ 170.8, 167.4, 143.8, 138.1, 133.0, 132.5, 131.4, 130.4, 129.3, 129.0, 126.9, 121.9, 114.1, 53.1, 52.7, 27.4; HRMS (ESI)  $m/z$  [M+H]<sup>+</sup> Calcd for C<sub>18</sub>H<sub>19</sub>N<sub>2</sub>O<sub>4</sub>: 327.1339, Found 327.1337.

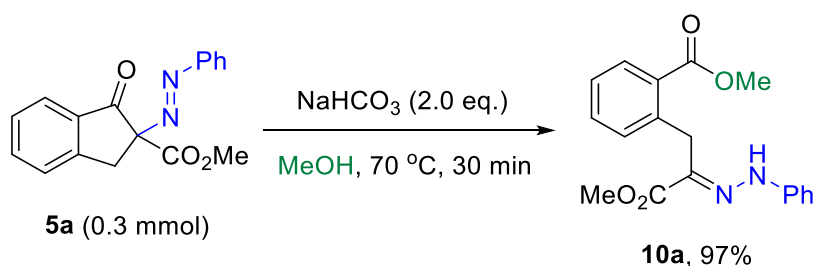

In an oven-dried seal tube (25 mL) equipped with a stir bar, NaHCO<sub>3</sub> (50.4 mg, 0.6 mmol), MeOH (3 mL), **5a** (88.3 mg, 0.3 mmol) were added. Then the vessel was sealed at atmospheric pressure of air and the resulting mixture was stirred in a 70 °C oil bath for 0.5 h. The resulting mixture was

concentrated under reduced pressure and pure **10a** (97%, 95.0 mg) was obtained by flash column chromatography on silica gel (petroleum ether: ethyl acetate = 12:1).

### Possible ring-opening mechanism

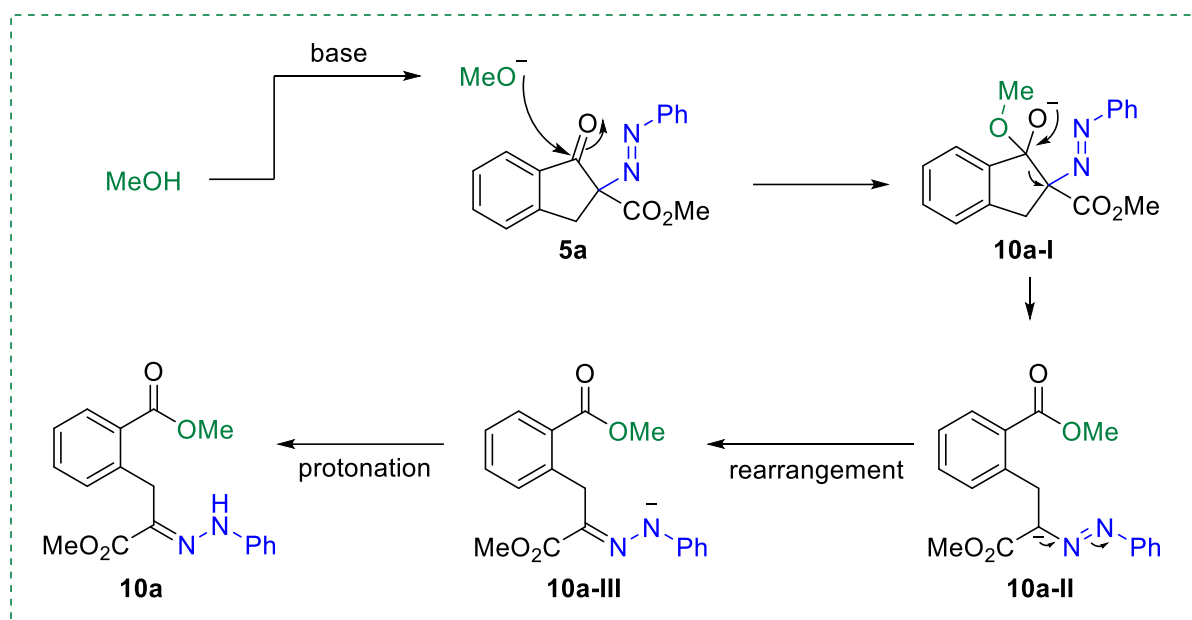

**Figure S4** Possible reaction mechanism of ring-opening reaction

Hydrazone **10a** may be generated by nucleophilic addition, intramolecular elimination, rearrangement, and protonation processes, as shown in the figure above.

## Mechanistic experiment

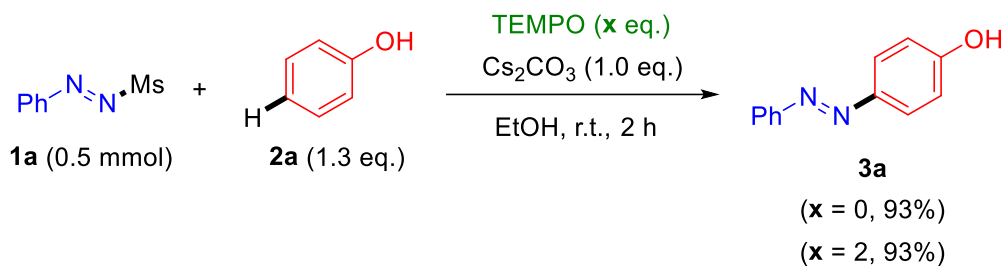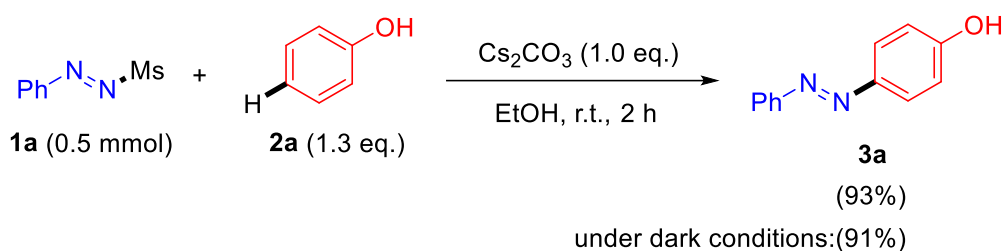

When 2,2,6,6-tetramethylpiperidin-1-yl)oxyl (TEMPO) was added to the reaction of **1a** and **2a** under the standard conditions, the reaction was not suppressed (with 0 equiv of TEMPO: **3a**, 93%; with 2 equiv of TEMPO: **3a**, 93%).

Light has no obvious effect on the reaction, and **3a** can be obtained with almost the same yield (91%) under dark conditions.

These results suggest that radical intermediates may not be involved in the substitution reaction.

### X-ray crystal structure of **3o**

The displacement ellipsoids are drawn at the 50% probability level. Single crystals suitable for X-ray analysis were obtained by slow evaporation of the mixed solution of ethyl acetate/petroleum ether (1/10, v/v). Supplementary crystallographic data was deposited at the Cambridge Crystallographic Data Centre (CCDC) under the number CCDC 2263570 (**3o**) and can be obtained free of charge from via [www.ccdc.cam.ac.uk/data\\_request.cif](http://www.ccdc.cam.ac.uk/data_request.cif).

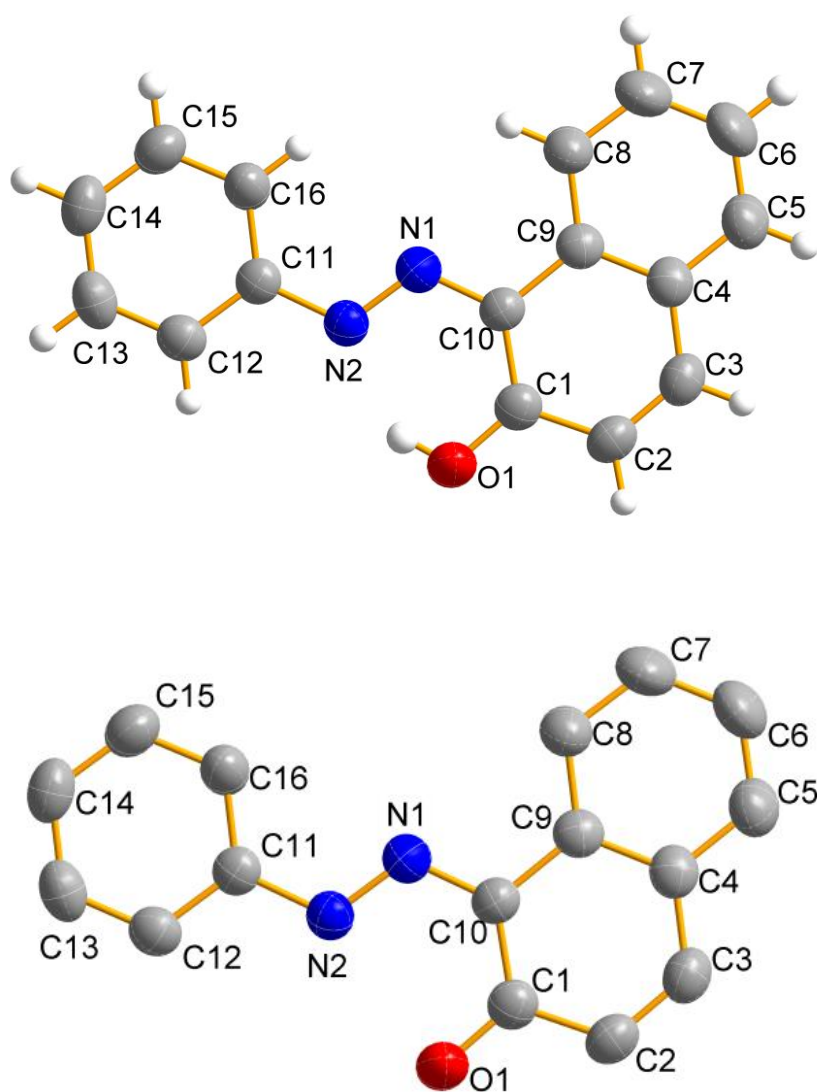

**Figure S5** X-ray ORTEP illustration of (*E*)-1-(phenyldiazenyl)naphthalen-2-ol (**3o**) (50% probability ellipsoids)

**Table S3** Crystal data and structure refinement for **3o**

|                                   |                                                  |                 |
|-----------------------------------|--------------------------------------------------|-----------------|
| Identification code               | Zgao_a                                           |                 |
| Empirical formula                 | C <sub>16</sub> H <sub>12</sub> N <sub>2</sub> O |                 |
| Formula weight                    | 248.28                                           |                 |
| Temperature                       | 295(2) K                                         |                 |
| Wavelength                        | 0.71073 Å                                        |                 |
| Crystal system                    | monoclinic                                       |                 |
| Space group                       | P 21/c                                           |                 |
| Unit cell dimensions              | a = 5.8326(8) Å                                  | α = 90 °        |
|                                   | b = 17.478(3) Å                                  | β = 91.997(4) ° |
|                                   | c = 24.849(3) Å                                  | γ = 90 °        |
| Volume                            | 2531.7(6) Å <sup>3</sup>                         |                 |
| Z                                 | 8                                                |                 |
| Density (calculated)              | 1.303 mg/m <sup>3</sup>                          |                 |
| Absorption coefficient            | 0.083 mm <sup>-1</sup>                           |                 |
| F(000)                            | 1040                                             |                 |
| Crystal size                      | 0.520 x 0.200 x 0.160 mm <sup>3</sup>            |                 |
| Theta range for data collection   | 2.47 to 24.14 °                                  |                 |
| Index ranges                      | -7 ≤ h ≤ 7, -21 ≤ k ≤ 21, -30 ≤ l ≤ 30           |                 |
| Reflections collected             | 51542                                            |                 |
| Independent reflections           | 4970 [R(int) = 0.0911]                           |                 |
| Completeness to theta = 25.242 °  | 100.0 %                                          |                 |
| Max. and min. transmission        | 1.000 and 1.000                                  |                 |
| Refinement method                 | Full-matrix least-squares on F <sup>2</sup>      |                 |
| Data / restraints / parameters    | 4970 / 1 / 346                                   |                 |
| Goodness-of-fit on F <sup>2</sup> | 1.006                                            |                 |
| Final R indices [I > 2σ(I)]       | R1 = 0.0604, wR2 = 0.1492                        |                 |
| R indices (all data)              | R1 = 0.1336, wR2 = 0.1922                        |                 |
| Largest diff. peak and hole       | 0.560 and -0.197 e.Å <sup>-3</sup>               |                 |

### X-ray crystal structure of 10a

The displacement ellipsoids are drawn at the 50% probability level. Single crystals suitable for X-ray analysis were obtained by slow evaporation of the mixed solution of ethyl acetate/petroleum ether (1/5, v/v). Supplementary crystallographic data was deposited at the Cambridge Crystallographic Data Centre (CCDC) under the number CCDC 2268663 (**10a**) and can be obtained free of charge from via [www.ccdc.cam.ac.uk/data\\_request.cif](http://www.ccdc.cam.ac.uk/data_request.cif).

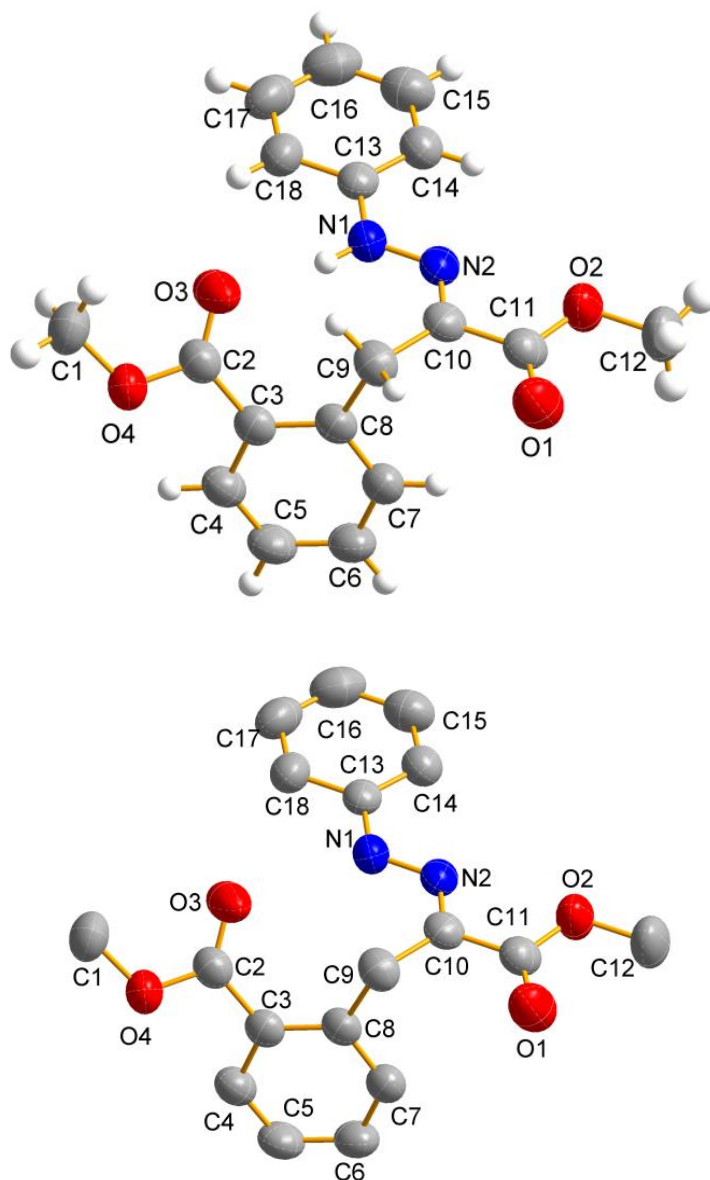

**Figure S6** X-ray ORTEP illustration of methyl (*E*)-2-(3-methoxy-3-oxo-2-(2-phenylhydrazineylidene)propyl)benzoate (**10a**) (50% probability ellipsoids)



**Table S4** Crystal data and structure refinement for **10a**

|                                   |                                                               |                 |
|-----------------------------------|---------------------------------------------------------------|-----------------|
| Identification code               | Zhao07223_0m                                                  |                 |
| Empirical formula                 | C <sub>18</sub> H <sub>18</sub> N <sub>2</sub> O <sub>4</sub> |                 |
| Formula weight                    | 326.34                                                        |                 |
| Temperature                       | 295(2) K                                                      |                 |
| Wavelength                        | 0.71073 Å                                                     |                 |
| Crystal system                    | monoclinic                                                    |                 |
| Space group                       | P 21/c                                                        |                 |
| Unit cell dimensions              | a = 4.7435(7) Å                                               | α = 90 °        |
|                                   | b = 16.733(2) Å                                               | β = 90.221(4) ° |
|                                   | c = 20.701(3) Å                                               | γ = 90 °        |
| Volume                            | 1643.1(4) Å <sup>3</sup>                                      |                 |
| Z                                 | 4                                                             |                 |
| Density (calculated)              | 1.319 mg/m <sup>3</sup>                                       |                 |
| Absorption coefficient            | 0.094 mm <sup>-1</sup>                                        |                 |
| F(000)                            | 688                                                           |                 |
| Crystal size                      | 0.420 x 0.220 x 0.060 mm <sup>3</sup>                         |                 |
| Theta range for data collection   | 2.63 to 27.23 °                                               |                 |
| Index ranges                      | -6 ≤ h ≤ 6, -21 ≤ k ≤ 21, -27 ≤ l ≤ 27                        |                 |
| Reflections collected             | 19601                                                         |                 |
| Independent reflections           | 3852 [R(int) = 0.0283]                                        |                 |
| Completeness to theta = 25.000 °  | 99.4 %                                                        |                 |
| Max. and min. transmission        | 0.994 and 0.994                                               |                 |
| Refinement method                 | Full-matrix least-squares on F <sup>2</sup>                   |                 |
| Data / restraints / parameters    | 3852 / 0 / 219                                                |                 |
| Goodness-of-fit on F <sup>2</sup> | 1.027                                                         |                 |
| Final R indices [I > 2σ(I)]       | R1 = 0.0424, wR2 = 0.1048                                     |                 |
| R indices (all data)              | R1 = 0.0645, wR2 = 0.1196                                     |                 |
| Largest diff. peak and hole       | 0.164 and -0.139 e.Å <sup>-3</sup>                            |                 |

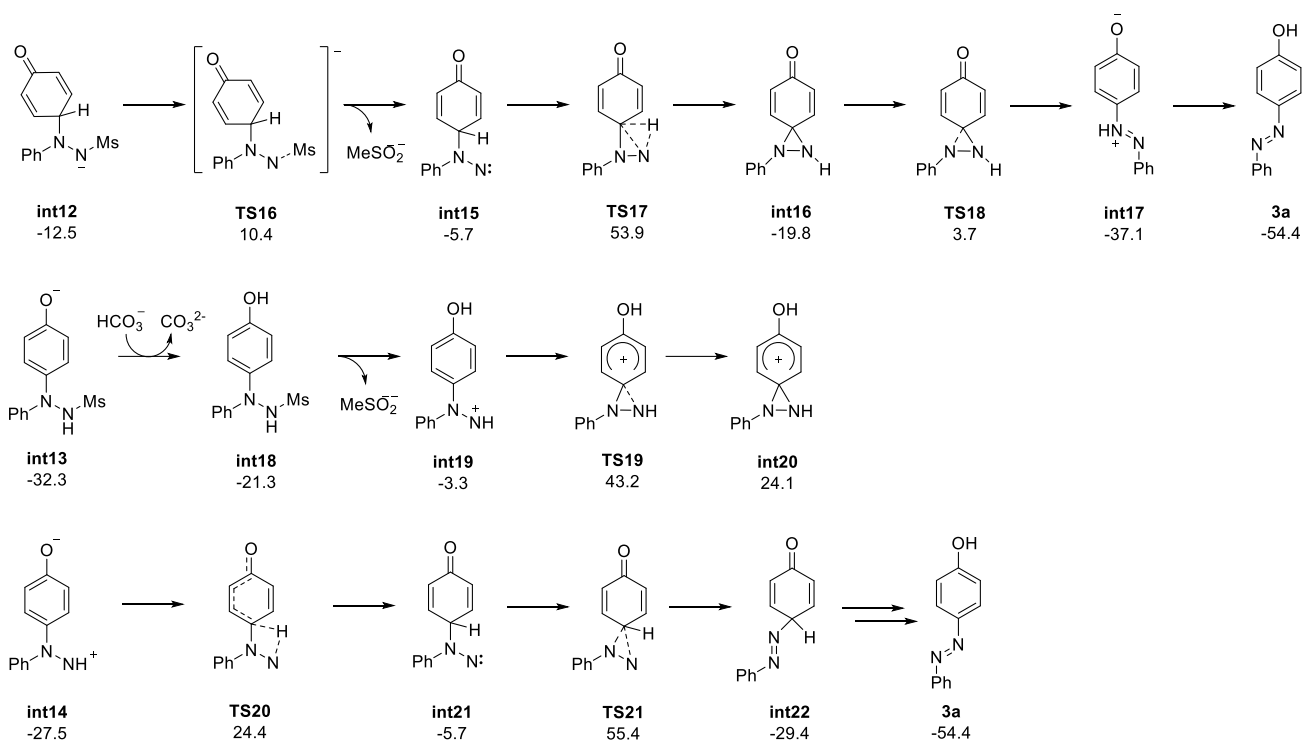

**Figure S7** Calculated relative solution-phase Gibbs free energies of unfavorable mechanisms of cross-coupling of **1a** and **2a** (in kcal/mol).

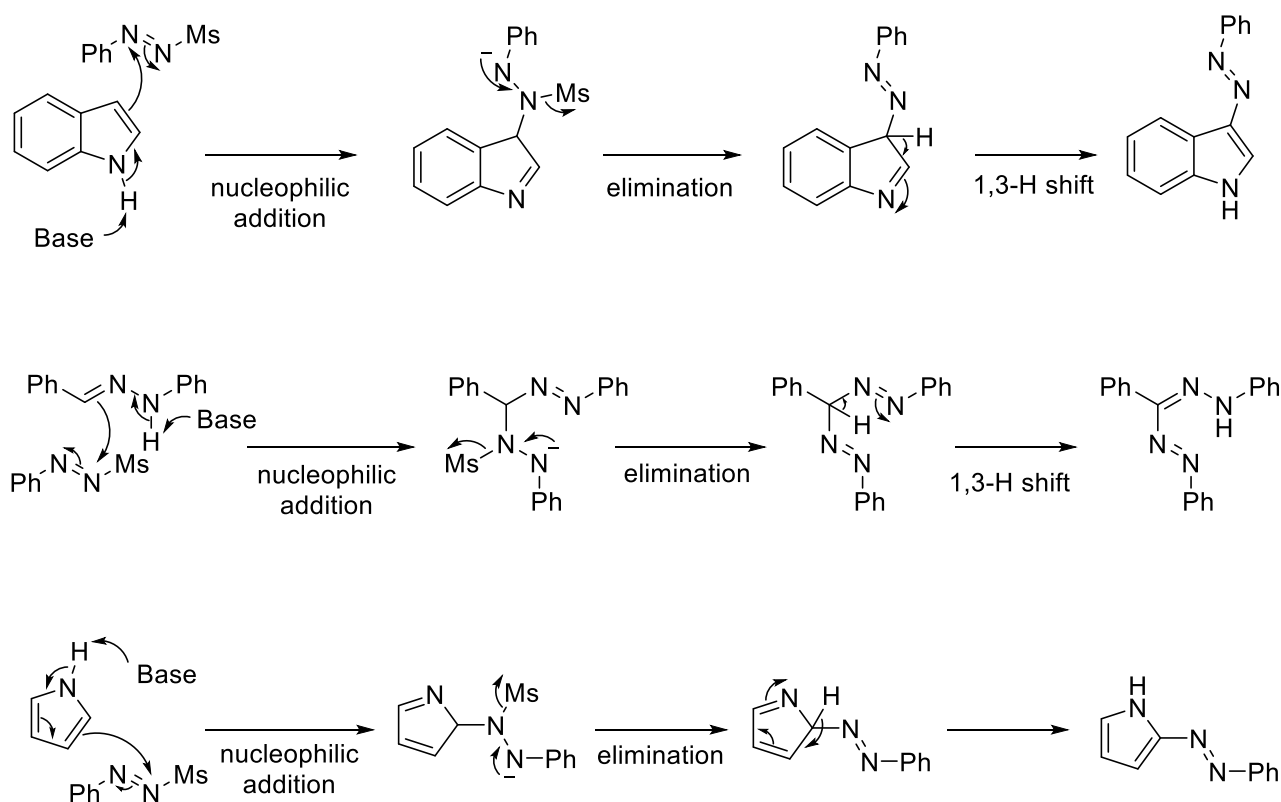

**Figure S8** The possible mechanism of arylation for other aromatic compounds

### Detail descriptions for products 3

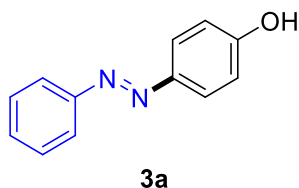

#### **(E)-4-(Phenyldiazenyl)phenol (3a).**<sup>16</sup>

Compound **3a** was prepared in 93% yield (92 mg) according to the general procedure.  $R_f = 0.2$  (petroleum ether/ethyl acetate = 10/1); Yellow solid; mp 155-157 °C;  $^1\text{H NMR}$  (500 MHz,  $\text{CDCl}_3$ ):  $\delta$  7.89-7.87 (m, 4H), 7.52-7.49 (m, 2H), 7.46-7.43 (m, 1H), 6.96-6.93 (m, 2H), 5.36 (s, br, 1H);  $^{13}\text{C NMR}$  (125 MHz,  $\text{CDCl}_3$ ):  $\delta$  158.4, 152.8, 147.4, 130.6, 129.2, 125.1, 122.7, 116.0; HRMS (ESI)  $m/z$   $[\text{M}+\text{H}]^+$  Calcd for  $\text{C}_{12}\text{H}_{11}\text{N}_2\text{O}$ : 199.0866, Found 199.0868. Analytical data for **3a** was consistent with that previously reported.<sup>16</sup>

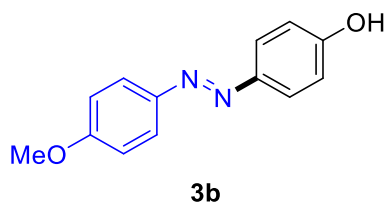

#### **(E)-4-((4-Methoxyphenyl)diazenyl)phenol (3b).**<sup>17</sup>

Compound **3b** was prepared in 90% yield (103 mg) according to the general procedure.  $R_f = 0.2$  (petroleum ether/ethyl acetate = 11/1); Yellow solid; mp 138-140 °C;  $^1\text{H NMR}$  (400 MHz,  $\text{CDCl}_3$ ):  $\delta$  7.88-7.86 (m, 2H), 7.82 (d,  $J = 8.8$  Hz, 2H), 7.01-6.99 (m, 2H), 6.92 (d,  $J = 8.8$  Hz, 2H), 4.19 (s, br, 1H), 3.88 (s, 3H);  $^{13}\text{C NMR}$  (100 MHz,  $\text{CDCl}_3$ ):  $\delta$  161.7, 158.2, 147.2, 147.1, 124.7, 124.5, 116.0, 114.3, 55.7; HRMS (ESI)  $m/z$   $[\text{M}+\text{H}]^+$  Calcd for  $\text{C}_{13}\text{H}_{13}\text{N}_2\text{O}_2$ : 229.0972, Found 229.0967. Analytical data for **3b** was consistent with that previously reported.<sup>17</sup>

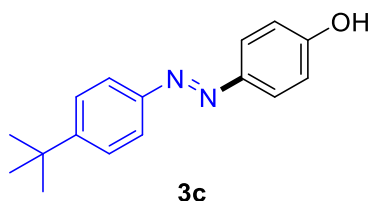

#### **(E)-4-((4-Tert-butylphenyl)diazenyl)phenol (3c).**<sup>18</sup>

Compound **3c** was prepared in 83% yield (106 mg) according to the general procedure.  $R_f = 0.2$  (petroleum ether/ethyl acetate = 11/1); Yellow solid; mp 124-126 °C;  $^1\text{H NMR}$  (500 MHz,  $\text{CDCl}_3$ ):  $\delta$

7.86 (d,  $J = 8.7$  Hz, 2H), 7.81 (d,  $J = 8.5$  Hz, 2H), 7.52 (d,  $J = 8.5$  Hz, 2H), 6.93 (d,  $J = 8.7$  Hz, 2H), 5.30 (s, br, 1H), 1.37 (s, 9H);  $^{13}\text{C}$  NMR (125 MHz,  $\text{CDCl}_3$ ):  $\delta$  158.2, 154.1, 150.8, 147.4, 126.1, 125.0, 122.4, 115.9, 35.1, 31.4; HRMS (ESI)  $m/z$   $[\text{M}+\text{H}]^+$  Calcd for  $\text{C}_{16}\text{H}_{19}\text{N}_2\text{O}$ : 255.1492, Found 255.1492. Analytical data for **3c** was consistent with that previously reported.<sup>18</sup>

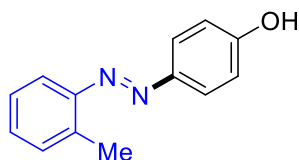

**3d**

**(E)-4-(*o*-Tolyldiazenyl)phenol (3d).**<sup>19</sup>

Compound **3d** was prepared in 88% yield (93 mg) according to the general procedure.  $R_f = 0.2$  (petroleum ether/ethyl acetate = 10/1); Yellow solid; mp 101-103 °C;  $^1\text{H}$  NMR (500 MHz,  $\text{CDCl}_3$ ):  $\delta$  7.87 (d,  $J = 8.8$  Hz, 2H), 7.58 (d,  $J = 7.9$  Hz, 1H), 7.32-7.31 (m, 2H), 7.25-7.23 (m, 1H), 6.93 (d,  $J = 8.8$  Hz, 2H), 4.13 (s, br, 1H), 2.69 (s, 3H);  $^{13}\text{C}$  NMR (125 MHz,  $\text{CDCl}_3$ ):  $\delta$  158.5, 151.0, 147.7, 137.6, 131.3, 130.5, 126.6, 125.2, 116.0, 115.6, 17.6; HRMS (ESI)  $m/z$   $[\text{M}+\text{H}]^+$  Calcd for  $\text{C}_{13}\text{H}_{13}\text{N}_2\text{O}$ : 213.1022, Found 213.1017. Analytical data for **3d** was consistent with that previously reported.<sup>19</sup>

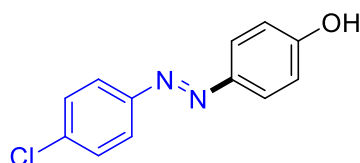

**3e**

**(E)-4-((4-Chlorophenyl)diazenyl)phenol (3e).**<sup>20</sup>

Compound **3e** was prepared in 93% yield (108 mg) according to the general procedure.  $R_f = 0.2$  (petroleum ether/ethyl acetate = 9/1); Yellow solid; mp 149-151 °C;  $^1\text{H}$  NMR (500 MHz,  $\text{DMSO}-d_6$ ):  $\delta$  10.41 (s, br, 1H), 7.83-7.80 (m, 4H), 7.61 (d,  $J = 7.9$  Hz, 2H), 6.95 (d,  $J = 8.3$  Hz, 2H);  $^{13}\text{C}$  NMR (125 MHz,  $\text{DMSO}-d_6$ ):  $\delta$  161.3, 150.7, 145.1, 134.8, 129.4, 125.0, 123.7, 116.0; HRMS (ESI)  $m/z$   $[\text{M}+\text{H}]^+$  Calcd for  $\text{C}_{12}\text{H}_{10}\text{ClN}_2\text{O}$ : 233.0476, Found 233.0480. Analytical data for **3e** was consistent with that previously reported.<sup>20</sup>

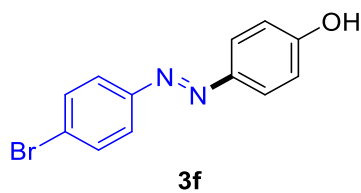

**(E)-4-((4-Bromophenyl)diazenyl)phenol (3f).**<sup>20</sup>

Compound **3f** was prepared in 72% yield (100 mg) according to the general procedure.  $R_f = 0.2$  (petroleum ether/ethyl acetate = 9/1); Yellow solid; mp 147-149 °C;  $^1\text{H NMR}$  (500 MHz,  $\text{CDCl}_3$ ):  $\delta$  7.87 (d,  $J = 8.6$  Hz, 2H), 7.75 (d,  $J = 8.5$  Hz, 2H), 7.62 (d,  $J = 8.5$  Hz, 2H), 6.94 (d,  $J = 8.6$  Hz, 2H), 5.41 (s, 1H);  $^{13}\text{C NMR}$  (125 MHz,  $\text{DMSO-}d_6$ ):  $\delta$  161.3, 151.0, 145.1, 132.4, 125.1, 124.0, 123.6, 116.0; HRMS (ESI)  $m/z$   $[\text{M}+\text{H}]^+$  Calcd for  $\text{C}_{12}\text{H}_{10}\text{BrN}_2\text{O}$ : 276.9971, Found 276.9969. Analytical data for **3f** was consistent with that previously reported.<sup>20</sup>

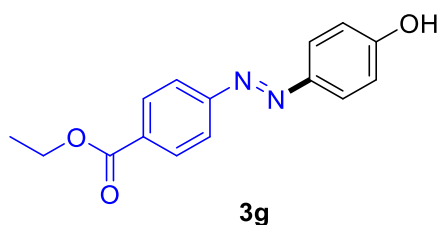

**Ethyl (E)-4-((4-hydroxyphenyl)diazenyl)benzoate (3g).**<sup>21</sup>

Compound **3g** was prepared in 73% yield (99 mg) according to the general procedure.  $R_f = 0.2$  (petroleum ether/ethyl acetate = 8/1); Yellow solid; mp 160-162 °C;  $^1\text{H NMR}$  (400 MHz,  $\text{CDCl}_3$ ):  $\delta$  8.18 (d,  $J = 8.4$  Hz, 2H), 7.92-7.89 (m, 4H), 6.98 (d,  $J = 8.7$  Hz, 2H), 6.23 (s, br, 1H), 4.42 (q,  $J = 7.1$  Hz, 2H), 1.43 (t,  $J = 7.1$  Hz, 3H);  $^{13}\text{C NMR}$  (100 MHz,  $\text{CDCl}_3$ ):  $\delta$  166.6, 159.4, 155.5, 147.2, 131.5, 130.7, 125.6, 122.5, 116.1, 61.5, 14.5; HRMS (ESI)  $m/z$   $[\text{M}+\text{H}]^+$  Calcd for  $\text{C}_{15}\text{H}_{15}\text{N}_2\text{O}_3$ : 271.1077, Found 271.1085. Analytical data for **3g** was consistent with that previously reported.<sup>21</sup>

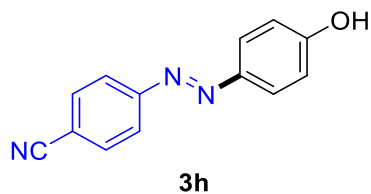

**(E)-4-((4-Hydroxyphenyl)diazenyl)benzonitrile (3h).**<sup>22</sup>

Compound **3h** was prepared in 41% yield (46 mg) according to the general procedure.  $R_f = 0.2$  (petroleum ether/ethyl acetate = 7/1); Yellow solid; mp 175-177 °C;  $^1\text{H NMR}$  (500 MHz,  $\text{DMSO-}d_6$ ):

$\delta$  10.51 (s, 1H), 8.02-8.01 (m, 2H), 7.93-7.91 (m, 2H), 7.86-7.83 (m, 2H), 6.98-6.96 (m, 2H);  $^{13}\text{C}$  NMR (125 MHz, DMSO- $d_6$ ):  $\delta$  162.1, 154.3, 145.3, 133.7, 125.6, 122.7, 118.5, 116.2, 112.2; HRMS (ESI)  $m/z$   $[\text{M}+\text{H}]^+$  Calcd for  $\text{C}_{13}\text{H}_{10}\text{N}_3\text{O}$ : 224.0818, Found 224.0820. Analytical data for **3h** was consistent with that previously reported.<sup>22</sup>

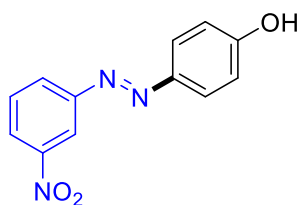

**3i**

**(E)-4-((3-Nitrophenyl)diazenyl)phenol (3i).**<sup>23</sup>

Compound **3i** was prepared in 39% yield (47 mg) according to the general procedure.  $R_f = 0.2$  (petroleum ether/ethyl acetate = 7/1); Yellow solid; mp 165-167 °C;  $^1\text{H}$  NMR (500 MHz, DMSO- $d_6$ ):  $\delta$  10.53 (s, 1H), 8.47-8.46 (m, 1H), 8.34-8.31 (m, 1H), 8.27-8.24 (m, 1H), 7.89-7.83 (m, 3H), 6.99-6.96 (m, 2H);  $^{13}\text{C}$  NMR (125 MHz, DMSO- $d_6$ ):  $\delta$  162.0, 152.5, 148.6, 145.0, 130.9, 129.4, 125.6, 124.4, 116.1, 115.1; HRMS (ESI)  $m/z$   $[\text{M}+\text{H}]^+$  Calcd for  $\text{C}_{12}\text{H}_{10}\text{N}_3\text{O}_3$ : 244.0717, Found 244.0725. Analytical data for **3i** was consistent with that previously reported.<sup>23</sup>

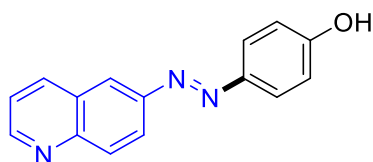

**3j**

**(E)-4-(Quinolin-6-yl)diazenylphenol (3j).**

Compound **3j** was prepared in 58% yield (72 mg) according to the general procedure.  $R_f = 0.2$  (petroleum ether/ethyl acetate = 3/1); Yellow solid; mp 253-255 °C;  $^1\text{H}$  NMR (500 MHz, DMSO- $d_6$ ):  $\delta$  10.38 (s, 1H), 8.96-8.95 (m, 1H), 8.56 (d,  $J = 8.3$  Hz, 1H), 8.48 (d,  $J = 2.0$  Hz, 1H), 8.20 (dd,  $J = 9.1, 2.2$  Hz, 1H), 8.12 (d,  $J = 9.1$  Hz, 1H), 7.88 (d,  $J = 8.8$  Hz, 2H), 7.63-7.60 (m, 1H), 6.98 (d,  $J = 8.8$  Hz, 2H);  $^{13}\text{C}$  NMR (125 MHz, DMSO- $d_6$ ):  $\delta$  161.3, 151.5, 149.5, 148.6, 145.3, 137.2, 130.3, 128.2, 125.5, 125.0, 122.2, 120.7, 116.0; HRMS (ESI)  $m/z$   $[\text{M}+\text{H}]^+$  Calcd for  $\text{C}_{15}\text{H}_{12}\text{N}_3\text{O}$ : 250.0975, Found 250.0973.

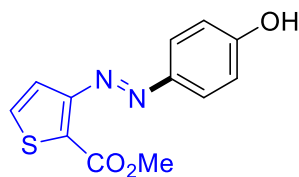

**3k**

**Methyl (*E*)-3-((4-hydroxyphenyl)diazenyl)thiophene-2-carboxylate (3k).**

Compound **3k** was prepared in 50% yield (66 mg) according to the general procedure.  $R_f = 0.2$  (petroleum ether/ethyl acetate = 3/1); Yellow solid; mp 148-150 °C;  $^1\text{H NMR}$  (500 MHz,  $\text{DMSO-}d_6$ ):  $\delta$  10.43 (s, 1H), 7.90 (d,  $J = 5.4$  Hz, 1H), 7.83-7.80 (m, 2H), 7.39 (d,  $J = 5.4$  Hz, 1H), 6.98-6.95 (m, 2H), 3.88 (s, 3H);  $^{13}\text{C NMR}$  (125 MHz,  $\text{DMSO-}d_6$ ):  $\delta$  161.7, 161.1, 156.3, 145.6, 131.9, 127.9, 125.4, 118.6, 116.1, 52.4; HRMS (ESI)  $m/z$   $[\text{M}+\text{H}]^+$  Calcd for  $\text{C}_{12}\text{H}_{11}\text{N}_2\text{O}_3\text{S}$ : 263.0485, Found 263.0480.

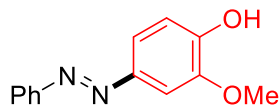

**3l**

**(*E*)-2-Methoxy-4-(phenyldiazenyl)phenol (3l).<sup>24</sup>**

Compound **3l** was prepared in 86% yield (98 mg) according to the general procedure.  $R_f = 0.2$  (petroleum ether/ethyl acetate = 10/1); Yellow solid; mp 68-70 °C;  $^1\text{H NMR}$  (500 MHz,  $\text{CDCl}_3$ ):  $\delta$  7.89-7.88 (m, 2H), 7.63-7.61 (m, 1H), 7.52-7.49 (m, 3H), 7.46-7.43 (m, 1H), 7.07 (d,  $J = 8.4$  Hz, 1H), 5.99 (s, br, 1H), 3.99 (s, 3H);  $^{13}\text{C NMR}$  (125 MHz,  $\text{CDCl}_3$ ):  $\delta$  152.8, 149.0, 147.2, 146.9, 130.5, 129.2, 122.7, 121.5, 114.3, 102.0, 56.2; HRMS (ESI)  $m/z$   $[\text{M}+\text{H}]^+$  Calcd for  $\text{C}_{13}\text{H}_{13}\text{N}_2\text{O}_2$ : 229.0972, Found 229.0976. Analytical data for **3l** was consistent with that previously reported.<sup>24</sup>

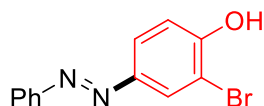

**3m**

**(*E*)-2-Bromo-4-(phenyldiazenyl)phenol (3m).**

Compound **3m** was prepared in 83% yield (115 mg) according to the general procedure.  $R_f = 0.2$  (petroleum ether/ethyl acetate = 10/1); Yellow solid; mp 77-79 °C;  $^1\text{H NMR}$  (500 MHz,  $\text{CDCl}_3$ ):  $\delta$  8.12 (d,  $J = 2.2$  Hz, 1H), 7.90-7.88 (m, 3H), 7.53-7.45 (m, 3H), 7.16 (d,  $J = 8.7$  Hz, 1H), 5.46 (s, br,

1H);  $^{13}\text{C}$  NMR (125 MHz,  $\text{CDCl}_3$ ):  $\delta$  154.8, 152.6, 147.4, 131.0, 129.2, 125.9, 125.7, 122.9, 116.3, 111.3; HRMS (ESI)  $m/z$   $[\text{M}+\text{H}]^+$  Calcd for  $\text{C}_{12}\text{H}_{10}\text{BrN}_2\text{O}$ : 276.9971, Found 276.9978.

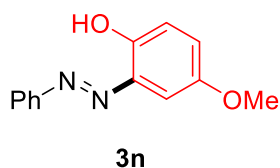

**(E)-4-Methoxy-2-(phenyldiazenyl)phenol (3n).**

Compound **3n** was prepared in 44% yield (50 mg) according to the general procedure.  $R_f = 0.2$  (petroleum ether/ethyl acetate = 15/1); Yellow solid; mp 70-72 °C;  $^1\text{H}$  NMR (500 MHz,  $\text{CDCl}_3$ ):  $\delta$  12.46 (s, 1H), 7.88-7.86 (m, 2H), 7.54-7.51 (m, 2H), 7.49-7.47 (m, 1H), 7.45 (d,  $J = 2.7$  Hz, 1H), 7.01-6.96 (m, 2H), 3.87 (s, 3H);  $^{13}\text{C}$  NMR (125 MHz,  $\text{CDCl}_3$ ):  $\delta$  153.0, 150.8, 147.3, 137.1, 131.3, 129.5, 122.4, 121.8, 119.0, 114.8, 56.1; HRMS (ESI)  $m/z$   $[\text{M}+\text{H}]^+$  Calcd for  $\text{C}_{13}\text{H}_{13}\text{N}_2\text{O}_2$ : 229.0972, Found 229.0977.

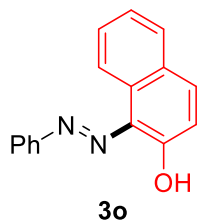

**(E)-1-(Phenyldiazenyl)naphthalen-2-ol (3o).**<sup>25</sup>

Compound **3o** was prepared in 81% yield (101 mg) according to the general procedure.  $R_f = 0.2$  (petroleum ether/ethyl acetate = 20/1); Yed solid; mp 128-130 °C;  $^1\text{H}$  NMR (500 MHz,  $\text{CDCl}_3$ ):  $\delta$  8.54 (d,  $J = 8.1$  Hz, 1H), 7.73-7.67 (m, 3H), 7.59-7.53 (m, 2H), 7.49-7.46 (m, 2H), 7.39-7.37 (m, 1H), 7.31-7.29 (m, 1H), 6.86-6.84 (m, 1H);  $^{13}\text{C}$  NMR (125 MHz,  $\text{CDCl}_3$ ):  $\delta$  172.2, 144.8, 140.2, 133.7, 130.1, 129.7, 129.0, 128.7, 128.1, 127.5, 125.8, 125.0, 121.8, 118.7; HRMS (ESI)  $m/z$   $[\text{M}+\text{H}]^+$  Calcd for  $\text{C}_{16}\text{H}_{13}\text{N}_2\text{O}$ : 249.1022, Found 249.1023. Analytical data for **3o** was consistent with that previously reported.<sup>25</sup>

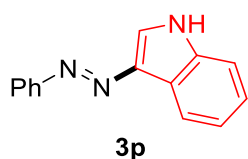

**(E)-3-(Phenyldiazenyl)-1H-indole (3p).**<sup>26</sup>



Compound **3p** was prepared in 71% yield (79 mg) according to the general procedure.  $R_f = 0.2$  (petroleum ether/ethyl acetate = 10/1); Yellow solid; mp 132-134 °C;  $^1\text{H NMR}$  (400 MHz,  $\text{CDCl}_3$ ):  $\delta$  8.61-8.57 (m, 2H), 8.00 (d,  $J = 3.0$  Hz, 1H), 7.91-7.89 (m, 2H), 7.53-7.49 (m, 2H), 7.42-7.32 (m, 4H);  $^{13}\text{C NMR}$  (100 MHz,  $\text{CDCl}_3$ ):  $\delta$  154.0, 137.0, 136.4, 130.6, 129.3, 129.1, 124.5, 123.2, 123.2, 122.0, 119.1, 111.5; HRMS (ESI)  $m/z$   $[\text{M}+\text{H}]^+$  Calcd for  $\text{C}_{14}\text{H}_{12}\text{N}_3$ : 222.1026, Found 222.1028. Analytical data for **3p** was consistent with that previously reported.<sup>26</sup>

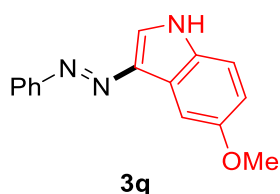

**(E)-5-Methoxy-3-(phenyldiazenyl)-1H-indole (3q).**

Compound **3q** was prepared in 66% yield (83 mg) according to the general procedure.  $R_f = 0.2$  (petroleum ether/ethyl acetate = 10/1); Yellow solid; mp 122-124 °C;  $^1\text{H NMR}$  (400 MHz,  $\text{CDCl}_3$ ):  $\delta$  8.56 (s, 1H), 8.10 (d,  $J = 1.6$  Hz, 1H), 7.96 (d,  $J = 1.0$  Hz, 1H), 7.86 (d,  $J = 7.9$  Hz, 2H), 7.51-7.47 (m, 2H), 7.39-7.36 (m, 1H), 7.26-7.24 (m, 1H), 6.97-6.94 (m, 1H), 3.91 (s, 3H);  $^{13}\text{C NMR}$  (100 MHz,  $\text{CDCl}_3$ ):  $\delta$  156.8, 153.9, 136.8, 131.3, 131.2, 129.2, 129.1, 121.9, 119.5, 114.3, 112.3, 104.9, 55.9; HRMS (ESI)  $m/z$   $[\text{M}+\text{H}]^+$  Calcd for  $\text{C}_{15}\text{H}_{14}\text{N}_3\text{O}$ : 252.1131, Found 252.1136.

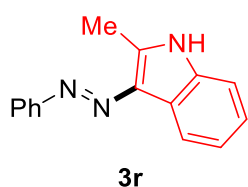

**(E)-2-Methyl-3-(phenyldiazenyl)-1H-indole (3r).**<sup>27</sup>

Compound **3r** was prepared in 83% yield (98 mg) according to the general procedure.  $R_f = 0.2$  (petroleum ether/ethyl acetate = 10/1); Yellow solid; mp 173-175 °C;  $^1\text{H NMR}$  (500 MHz,  $\text{CDCl}_3$ ):  $\delta$  8.52 (d,  $J = 7.6$  Hz, 1H), 8.12 (s, 1H), 7.87 (d,  $J = 7.9$  Hz, 2H), 7.47-7.44 (m, 2H), 7.34-7.31 (m, 1H), 7.26-7.21 (m, 3H), 2.74 (s, 3H);  $^{13}\text{C NMR}$  (125 MHz,  $\text{CDCl}_3$ ):  $\delta$  154.3, 143.0, 135.1, 133.0, 129.0, 128.7, 123.6, 123.0, 122.6, 121.8, 119.7, 110.6, 11.6; HRMS (ESI)  $m/z$   $[\text{M}+\text{H}]^+$  Calcd for  $\text{C}_{15}\text{H}_{14}\text{N}_3$ : 236.1182, Found 236.1186. Analytical data for **3r** was consistent with that previously reported.<sup>27</sup>

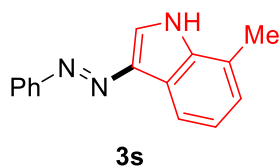

**(E)-7-Methyl-3-(phenyldiazenyl)-1H-indole (3s).**

Compound **3s** was prepared in 75% yield (88 mg) according to the general procedure.  $R_f = 0.2$  (petroleum ether/ethyl acetate = 10/1); Yellow solid; mp 111-113 °C;  $^1\text{H NMR}$  (500 MHz,  $\text{CDCl}_3$ ):  $\delta$  8.49 (s, 1H), 8.44 (d,  $J = 8.0$  Hz, 1H), 8.00 (d,  $J = 3.0$  Hz, 1H), 7.91-7.89 (m, 2H), 7.52-7.49 (m, 2H), 7.41-7.38 (m, 1H), 7.27-7.24 (m, 1H), 7.14 (d,  $J = 7.2$  Hz, 1H), 2.51 (s, 3H);  $^{13}\text{C NMR}$  (125 MHz,  $\text{CDCl}_3$ ):  $\delta$  153.9, 137.4, 135.9, 130.3, 129.3, 129.1, 125.2, 123.3, 122.0, 120.9, 120.5, 118.6, 16.5; HRMS (ESI)  $m/z$   $[\text{M}+\text{H}]^+$  Calcd for  $\text{C}_{15}\text{H}_{14}\text{N}_3$ : 236.1182, Found 236.1182.

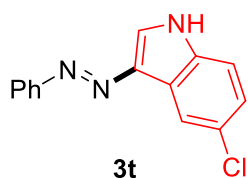

**(E)-5-Chloro-3-(phenyldiazenyl)-1H-indole (3t).**

Compound **3t** was prepared in 77% yield (98 mg) according to the general procedure.  $R_f = 0.2$  (petroleum ether/ethyl acetate = 8/1); Yellow solid; mp 127-129 °C;  $^1\text{H NMR}$  (400 MHz,  $\text{CDCl}_3$ ):  $\delta$  8.62 (s, 1H), 8.57 (s, 1H), 8.00 (d,  $J = 3.0$  Hz, 1H), 7.90 (d,  $J = 7.5$  Hz, 2H), 7.53-7.49 (m, 2H), 7.43-7.39 (m, 1H), 7.27-7.25 (m, 2H);  $^{13}\text{C NMR}$  (100 MHz,  $\text{CDCl}_3$ ):  $\delta$  153.7, 136.3, 134.6, 131.4, 129.6, 129.2, 128.8, 124.8, 122.7, 122.0, 119.8, 112.5; HRMS (ESI)  $m/z$   $[\text{M}+\text{H}]^+$  Calcd for  $\text{C}_{14}\text{H}_{11}\text{ClN}_3$ : 256.0636, Found 256.0634.

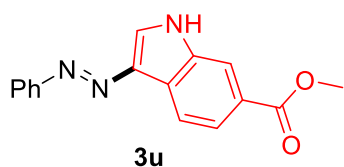

**Methyl (E)-3-(phenyldiazenyl)-1H-indole-6-carboxylate (3u).**

Compound **3u** was prepared in 69% yield (96 mg) according to the general procedure.  $R_f = 0.2$  (petroleum ether/ethyl acetate = 5/1); Yellow solid; mp 163-165 °C;  $^1\text{H NMR}$  (500 MHz,  $\text{CDCl}_3$ ):  $\delta$  9.15 (s, 1H), 8.58 (d,  $J = 8.4$  Hz, 1H), 8.17 (d,  $J = 0.6$  Hz, 1H), 8.15 (d,  $J = 3.0$  Hz, 1H), 7.99 (dd,  $J = 8.4, 1.4$  Hz, 1H), 7.91-7.89 (m, 2H), 7.52-7.49 (m, 2H), 7.42-7.40 (m, 1H), 3.97 (s, 3H);  $^{13}\text{C NMR}$

(125 MHz, CDCl<sub>3</sub>):  $\delta$  167.9, 153.7, 136.7, 135.8, 132.8, 129.7, 129.2, 125.9, 124.1, 122.8, 122.3, 122.1, 113.8, 52.3; HRMS (ESI)  $m/z$  [M+H]<sup>+</sup> Calcd for C<sub>16</sub>H<sub>14</sub>N<sub>3</sub>O<sub>2</sub>: 280.1081, Found 280.1085.

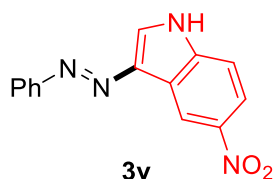

**(E)-5-Nitro-3-(phenyldiazenyl)-1H-indole (3v).**

Compound **3v** was prepared in 60% yield (80 mg) according to the general procedure.  $R_f = 0.2$  (petroleum ether/ethyl acetate = 2/1); Yellow solid; mp 234-236°C; <sup>1</sup>H NMR (500 MHz, DMSO-*d*<sub>6</sub>):  $\delta$  12.67 (s, br, 1H), 9.21 (d,  $J = 2.3$  Hz, 1H), 8.65 (s, 1H), 8.16 (dd,  $J = 9.0, 2.4$  Hz, 1H), 7.85-7.83 (m, 2H), 7.69 (d,  $J = 9.0$  Hz, 1H), 7.58-7.55 (m, 2H), 7.48-7.45 (m, 1H); <sup>13</sup>C NMR (125 MHz, DMSO-*d*<sub>6</sub>):  $\delta$  152.8, 143.1, 139.5, 136.5, 135.9, 129.7, 129.3, 121.6, 119.1, 118.7, 117.3, 113.0; HRMS (ESI)  $m/z$  [M+H]<sup>+</sup> Calcd for C<sub>14</sub>H<sub>11</sub>N<sub>4</sub>O<sub>2</sub>: 267.0877, Found 267.0875.

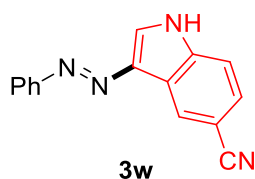

**(E)-3-(Phenyldiazenyl)-1H-indole-5-carbonitrile (3w).**

Compound **3w** was prepared in 51% yield (63 mg) according to the general procedure.  $R_f = 0.2$  (petroleum ether/ethyl acetate = 2/1); Yellow solid; mp 177-179 °C; <sup>1</sup>H NMR (500 MHz, DMSO-*d*<sub>6</sub>):  $\delta$  12.56 (s, br, 1H), 8.78 (s, 1H), 8.59 (s, 1H), 7.88 (d,  $J = 7.7$  Hz, 2H), 7.69-7.64 (m, 2H), 7.56-7.53 (m, 2H), 7.46-7.43 (m, 1H); <sup>13</sup>C NMR (125 MHz, DMSO-*d*<sub>6</sub>):  $\delta$  152.9, 138.2, 135.4, 134.9, 129.6, 129.2, 127.3, 126.7, 121.6, 120.2, 117.8, 113.7, 104.6; HRMS (ESI)  $m/z$  [M+H]<sup>+</sup> Calcd for C<sub>15</sub>H<sub>11</sub>N<sub>4</sub>: 247.0978, Found 247.0984.

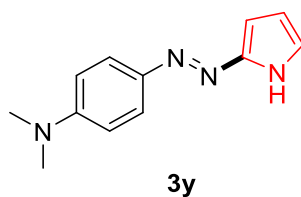

**(E)-4-((1H-pyrrol-2-yl)diazenyl)-N,N-dimethylaniline (3y).<sup>28</sup>**

Compound **3y** was prepared in 53% yield (57 mg) according to the general procedure.  $R_f = 0.2$  (petroleum ether/ethyl acetate = 5/1); Rufous solid; mp 159-160 °C;  $^1\text{H NMR}$  (500 MHz,  $\text{CDCl}_3$ ):  $\delta$  9.27 (s, br, 1H), 7.75 (d,  $J = 9.0$  Hz, 2H), 6.84-6.82 (m, 2H), 6.74 (d,  $J = 9.0$  Hz, 2H), 6.34-6.34 (m, 1H), 3.06 (s, 6H);  $^{13}\text{C NMR}$  (125 MHz,  $\text{CDCl}_3$ ):  $\delta$  151.6, 146.2, 143.5, 124.0, 119.9, 112.1, 111.9, 111.0, 40.5; HRMS (ESI)  $m/z$   $[\text{M}+\text{H}]^+$  Calcd for  $\text{C}_{12}\text{H}_{15}\text{N}_4$ : 215.1291, Found 215.1294. Analytical data for **3y** was consistent with that previously reported.<sup>28</sup>

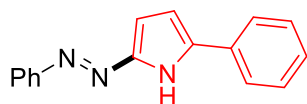

**3z**

**(E)-2-Phenyl-5-(phenyldiazenyl)-1H-pyrrole (3z).**

Compound **3z** was prepared in 90% yield (111 mg) according to the general procedure.  $R_f = 0.2$  (petroleum ether/ethyl acetate = 20/1); Yellow solid; mp 116-118 °C;  $^1\text{H NMR}$  (500 MHz,  $\text{CDCl}_3$ ):  $\delta$  9.53 (s, br, 1H), 7.82 (d,  $J = 7.8$  Hz, 2H), 7.63 (d,  $J = 7.7$  Hz, 2H), 7.50-7.42 (m, 4H), 7.39-7.32 (m, 2H), 7.08 (d,  $J = 3.7$  Hz, 1H), 6.74 (d,  $J = 3.7$  Hz, 1H);  $^{13}\text{C NMR}$  (125 MHz,  $\text{CDCl}_3$ ):  $\delta$  152.9, 146.5, 135.8, 131.2, 129.6, 129.2, 128.2, 124.9, 122.1, 118.0, 109.7; HRMS (ESI)  $m/z$   $[\text{M}+\text{H}]^+$  Calcd for  $\text{C}_{16}\text{H}_{14}\text{N}_3$ : 248.1182, Found 248.1187.

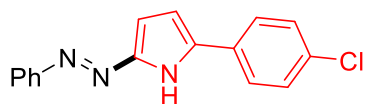

**3aa**

**(E)-2-(4-Chlorophenyl)-5-(phenyldiazenyl)-1H-pyrrole (3aa).**

Compound **3aa** was prepared in 93% yield (131 mg) according to the general procedure.  $R_f = 0.2$  (petroleum ether/ethyl acetate = 20/1); Yellow solid; mp 122-124 °C;  $^1\text{H NMR}$  (500 MHz,  $\text{CDCl}_3$ ):  $\delta$  9.49 (s, br, 1H), 7.82 (d,  $J = 7.6$  Hz, 2H), 7.54 (d,  $J = 8.5$  Hz, 2H), 7.50-7.47 (m, 2H), 7.40-7.37 (m, 3H), 7.07 (d,  $J = 4.0$  Hz, 1H), 6.70 (d,  $J = 4.0$  Hz, 1H);  $^{13}\text{C NMR}$  (125 MHz,  $\text{CDCl}_3$ ):  $\delta$  152.8, 146.6, 134.5, 133.9, 129.8, 129.4, 129.3, 126.1, 122.2, 117.9, 109.9; HRMS (ESI)  $m/z$   $[\text{M}+\text{H}]^+$  Calcd for  $\text{C}_{16}\text{H}_{13}\text{ClN}_3$ : 282.0793, Found 282.0797.

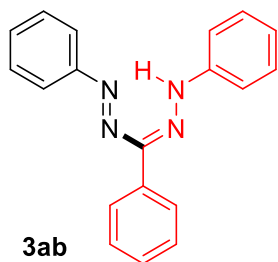

**(Z,E)-1,3,5-triphenylformazan (3ab).**<sup>29</sup>

Compound **3ab** was prepared in 61% yield (92 mg) according to the general procedure.  $R_f = 0.2$  (petroleum ether/ethyl acetate = 400/1); Red solid; mp 170-171 °C;  $^1\text{H NMR}$  (500 MHz,  $\text{CDCl}_3$ ):  $\delta$  15.41 (s, 1H), 8.13-8.12 (m, 2H), 7.68-7.66 (m, 4H), 7.45-7.42 (m, 6H), 7.34-7.27 (m, 3H);  $^{13}\text{C NMR}$  (125 MHz,  $\text{CDCl}_3$ ):  $\delta$  148.0, 141.3, 137.6, 129.8, 129.6, 128.5, 128.3, 127.8, 127.6, 126.6, 126.0, 120.2, 118.9; HRMS (ESI)  $m/z$   $[\text{M}+\text{H}]^+$  Calcd for  $\text{C}_{19}\text{H}_{17}\text{N}_4$ : 301.1448, Found 301.1450. Analytical data for **3ab** was consistent with that previously reported.<sup>29</sup>

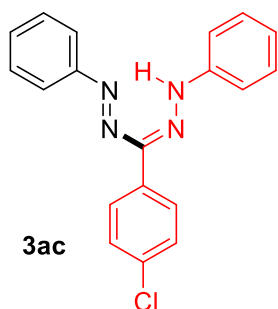

**(Z,E)-3-(4-chlorophenyl)-1,5-diphenylformazan (3ac).**<sup>30</sup>

Compound **3ac** was prepared in 33% yield (55 mg) according to the general procedure.  $R_f = 0.2$  (petroleum ether/ethyl acetate = 400/1); Red solid; mp 205-206 °C;  $^1\text{H NMR}$  (500 MHz,  $\text{CDCl}_3$ ):  $\delta$  15.45 (s, 1H), 8.07 (d,  $J = 8.6$  Hz, 2H), 7.67 (d,  $J = 7.6$  Hz, 4H), 7.48-7.45 (m, 4H), 7.39 (d,  $J = 8.7$  Hz, 2H), 7.31-7.28 (m, 2H);  $^{13}\text{C NMR}$  (125 MHz,  $\text{CDCl}_3$ ):  $\delta$  147.8, 140.4, 136.1, 133.6, 129.6, 128.7, 127.8, 127.2, 119.0; HRMS (ESI)  $m/z$   $[\text{M}+\text{H}]^+$  Calcd for  $\text{C}_{19}\text{H}_{16}\text{ClN}_4$ : 335.1058, Found 335.1063. Analytical data for **3ac** was consistent with that previously reported.<sup>30</sup>

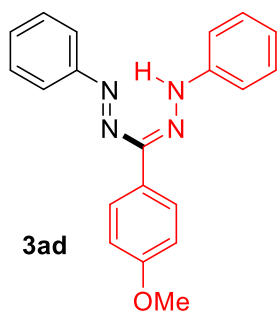

**(Z,E)-3-(4-methoxyphenyl)-1,5-diphenylformazan (3ad).**<sup>31</sup>

Compound **3ad** was prepared in 57% yield (94 mg) according to the general procedure.  $R_f = 0.2$  (petroleum ether/ethyl acetate = 200/1); Red solid; mp 158-159 °C;  $^1\text{H NMR}$  (500 MHz,  $\text{CDCl}_3$ ):  $\delta$  15.20 (s, 1H), 8.05 (d,  $J = 9.0$  Hz, 2H), 7.66-7.64 (m, 4H), 7.44-7.41 (m, 4H), 7.24 (d,  $J = 8.7$  Hz, 2H), 6.96 (d,  $J = 9.0$  Hz, 2H), 3.85 (s, 3H);  $^{13}\text{C NMR}$  (125 MHz,  $\text{CDCl}_3$ ):  $\delta$  159.6, 148.1, 141.4, 130.7, 130.3, 129.7, 129.5, 128.3, 127.4, 126.7, 118.8, 115.2, 114.0; HRMS (ESI)  $m/z$   $[\text{M}+\text{H}]^+$  Calcd for  $\text{C}_{20}\text{H}_{19}\text{N}_4\text{O}$ : 331.1553, Found 331.1546. Analytical data for **3ad** was consistent with that previously reported.<sup>31</sup>

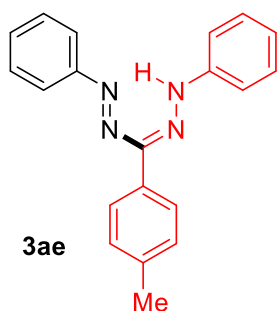

**(Z,E)-1,5-diphenyl-3-(p-tolyl)formazan (3ae).**<sup>31</sup>

Compound **3ae** was prepared in 59% yield (93 mg) according to the general procedure.  $R_f = 0.2$  (petroleum ether/ethyl acetate = 400/1); Red solid; mp 155-156 °C;  $^1\text{H NMR}$  (500 MHz,  $\text{CDCl}_3$ ):  $\delta$  15.34 (s, 1H), 8.05 (d,  $J = 8.3$  Hz, 2H), 7.71-7.69 (m, 4H), 7.48-7.45 (m, 4H), 7.30-7.27 (m, 4H), 2.43 (s, 3H);  $^{13}\text{C NMR}$  (125 MHz,  $\text{CDCl}_3$ ):  $\delta$  148.1, 141.5, 137.6, 134.8, 130.5, 129.5, 129.3, 129.3, 129.2, 127.5, 126.0, 118.9, 113.0; HRMS (ESI)  $m/z$   $[\text{M}+\text{H}]^+$  Calcd for  $\text{C}_{20}\text{H}_{19}\text{N}_4$ : 315.1604, Found 315.1599. Analytical data for **3ae** was consistent with that previously reported.<sup>31</sup>

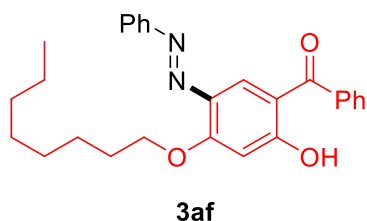

**(*E*)-2-Hydroxy-4-(octyloxy)-5-(phenyldiazenyl)phenyl(phenyl)methanone (3af).**

Compound **3af** was prepared in 74% yield (159 mg) according to the general procedure.  $R_f = 0.2$  (petroleum ether/ethyl acetate = 15/1); Yellow solid; mp 79-81 °C;  $^1\text{H NMR}$  (500 MHz,  $\text{CDCl}_3$ ):  $\delta$  12.89 (s, 1H), 8.03 (s, 1H), 7.81-7.80 (m, 2H), 7.71-7.69 (m, 2H), 7.61-7.58 (m, 1H), 7.54-7.51 (m, 2H), 7.47-7.40 (m, 3H), 6.68 (s, 1H), 4.24 (t,  $J = 6.6$  Hz, 2H), 1.98-1.92 (m, 2H), 1.54-1.51 (m, 2H), 1.42-1.39 (m, 2H), 1.35-1.28 (m, 6H), 0.88 (t,  $J = 6.7$  Hz, 3H);  $^{13}\text{C NMR}$  (125 MHz,  $\text{CDCl}_3$ ):  $\delta$  200.9, 168.2, 163.2, 153.0, 138.0, 135.8, 132.1, 130.7, 129.3, 129.1, 128.6, 123.0, 122.2, 112.2, 101.6, 69.8, 31.9, 29.4, 29.4, 29.0, 26.1, 22.8, 14.2; HRMS (ESI)  $m/z$   $[\text{M}+\text{H}]^+$  Calcd for  $\text{C}_{27}\text{H}_{31}\text{N}_2\text{O}_3$ : 431.2329, Found 431.2337.

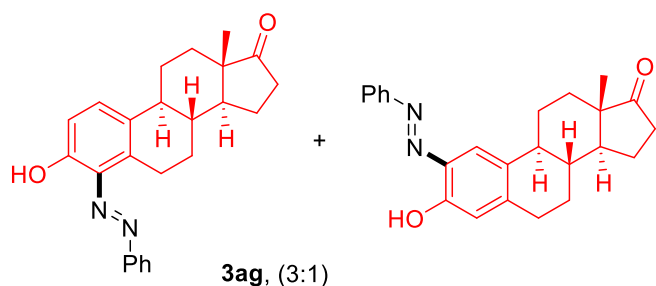

**(8*R*,9*S*,13*S*,14*S*)-3-Hydroxy-13-methyl-4-((*E*)-phenyldiazenyl)-6,7,8,9,11,12,13,14,15,16-decahydro-17*H*-cyclopenta[*a*]phenanthren-17-one and (8*R*,9*S*,13*S*,14*S*)-3-Hydroxy-13-methyl-2-((*E*)-phenyldiazenyl)-6,7,8,9,11,12,13,14,15,16-decahydro-17*H*-cyclopenta[*a*]phenanthren-17-one (3ag).**

Compound **3ag** was prepared in 70% yield (131 mg) according to the general procedure.  $R_f = 0.2$  (petroleum ether/ethyl acetate = 10/1); Yellow solid; mp 159-161 °C;  $^1\text{H NMR}$  (500 MHz,  $\text{CDCl}_3$ ): major isomer:  $\delta$  13.58 (s, 1H), 7.85-7.83 (m, 2H), 7.53-7.50 (m, 2H), 7.47-7.44 (m, 1H), 7.33 (d,  $J = 8.8$  Hz, 1H), 6.84 (d,  $J = 8.8$  Hz, 1H), 3.69-3.65 (m, 1H), 3.25-3.19 (m, 1H), 2.55-2.50 (m, 1H), 2.44-2.41 (m, 1H), 2.34-2.30 (m, 1H), 2.20-2.07 (m, 3H), 2.05-1.98 (m, 1H), 1.69-1.61 (m, 3H), 1.58-1.47 (m, 3H), 0.94 (s, 3H), minor isomer:  $\delta$  12.74 (s, 1H), 6.76 (s, 1H), 2.98-2.93 (m, 2H), other peaks are

overlapped with the signals of the major isomer;  $^{13}\text{C}$  NMR (125 MHz,  $\text{CDCl}_3$ ):  $\delta$  220.9, 220.8, 151.4, 151.0, 150.8, 150.8, 143.6, 139.4, 136.2, 134.7, 132.2, 131.8, 131.6, 130.9, 130.3, 129.5, 129.5, 122.3, 122.2, 117.7, 115.9, 50.6, 50.5, 48.1, 48.1, 44.1, 43.8, 38.2, 38.1, 36.0, 36.0, 31.8, 31.6, 26.4, 26.3, 26.0, 25.9, 21.7, 21.7, 14.0, 14.0; HRMS (ESI)  $m/z$   $[\text{M}+\text{H}]^+$  Calcd for  $\text{C}_{24}\text{H}_{27}\text{N}_2\text{O}_2$ : 375.2067, Found 375.2072.



## Detail descriptions for products 5

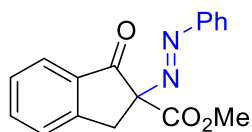

**5a**

### Methyl (*E*)-1-oxo-2-(phenyldiazenyl)-2,3-dihydro-1*H*-indene-2-carboxylate (**5a**).<sup>32</sup>

Compound **5a** was prepared in 86% yield (76 mg) according to the general procedure.  $R_f = 0.2$  (petroleum ether/ethyl acetate = 10/1); Yellow oil;  $^1\text{H NMR}$  (500 MHz,  $\text{CDCl}_3$ ):  $\delta$  7.82 (d,  $J = 7.7$  Hz, 1H), 7.75-7.72 (m, 2H), 7.67-7.64 (m, 1H), 7.53 (d,  $J = 7.7$  Hz, 1H), 7.44-7.41 (m, 4H), 3.96-3.89 (m, 2H), 3.86 (s, 3H);  $^{13}\text{C NMR}$  (125 MHz,  $\text{CDCl}_3$ ):  $\delta$  196.6, 169.0, 152.3, 151.5, 136.0, 134.6, 131.8, 129.1, 128.3, 126.6, 125.4, 123.0, 87.8, 53.4, 36.0; HRMS (ESI)  $m/z$   $[\text{M}+\text{Na}]^+$  Calcd for  $\text{C}_{17}\text{H}_{14}\text{N}_2\text{NaO}_3$ : 317.0897, Found 317.0895. Analytical data for **5a** was consistent with that previously reported.<sup>32</sup>

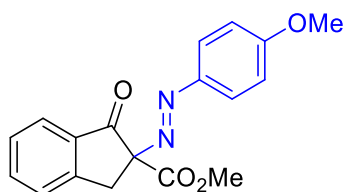

**5b**

### Methyl (*E*)-2-((4-methoxyphenyl)diazenyl)-1-oxo-2,3-dihydro-1*H*-indene-2-carboxylate (**5b**).

Compound **5b** was prepared in 87% yield (85 mg) according to the general procedure.  $R_f = 0.2$  (petroleum ether/ethyl acetate = 10/1); Yellow oil;  $^1\text{H NMR}$  (500 MHz,  $\text{CDCl}_3$ ):  $\delta$  7.81 (d,  $J = 7.7$  Hz, 1H), 7.75-7.72 (m, 2H), 7.66-7.63 (m, 1H), 7.52 (d,  $J = 7.7$  Hz, 1H), 7.43-7.40 (m, 1H), 6.93-6.90 (m, 2H), 3.94-3.83 (m, 8H);  $^{13}\text{C NMR}$  (125 MHz,  $\text{CDCl}_3$ ):  $\delta$  197.1, 169.3, 162.6, 152.4, 145.8, 135.9, 134.7, 128.2, 126.6, 125.3, 125.0, 114.1, 87.2, 55.7, 53.3, 36.1; HRMS (ESI)  $m/z$   $[\text{M}+\text{Na}]^+$  Calcd for  $\text{C}_{18}\text{H}_{16}\text{N}_2\text{NaO}_4$ : 347.1002, Found 347.1007.

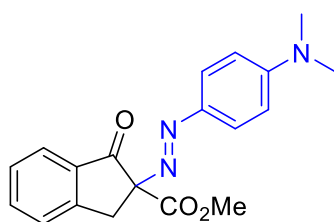

**5c**

**Methyl (*E*)-2-((4-(dimethylamino)phenyl)diazenyl)-1-oxo-2,3-dihydro-1*H*-indene-2-carboxylate (5c).**

Compound **5c** was prepared in 67% yield (68 mg) according to the general procedure.  $R_f = 0.2$  (petroleum ether/ethyl acetate = 3/1); Yellow oil;  $^1\text{H NMR}$  (500 MHz,  $\text{CDCl}_3$ ):  $\delta$  8.10 (d,  $J = 7.8$  Hz, 1H), 7.63 (d,  $J = 9.2$  Hz, 2H), 7.50-7.47 (m, 1H), 7.36-7.33 (m, 1H), 7.23 (d,  $J = 7.5$  Hz, 1H), 6.61 (d,  $J = 9.2$  Hz, 2H), 3.85-3.80 (m, 5H), 3.04 (s, 6H);  $^{13}\text{C NMR}$  (125 MHz,  $\text{CDCl}_3$ ):  $\delta$  196.1, 167.4, 153.3, 141.3, 135.1, 134.2, 129.9, 128.2, 127.9, 125.8, 125.2, 111.2, 100.5, 53.4, 40.3, 33.4; HRMS (ESI)  $m/z$   $[\text{M}+\text{Na}]^+$  Calcd for  $\text{C}_{19}\text{H}_{19}\text{N}_3\text{NaO}_3$ : 360.1319, Found 360.1327.

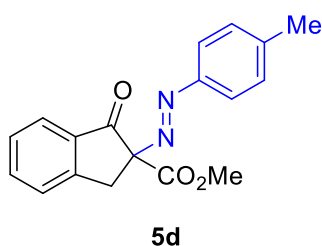

**Methyl (*E*)-1-oxo-2-(*p*-tolyldiazenyl)-2,3-dihydro-1*H*-indene-2-carboxylate (5d).**

Compound **5d** was prepared in 82% yield (76 mg) according to the general procedure.  $R_f = 0.2$  (petroleum ether/ethyl acetate = 8/1); Yellow oil;  $^1\text{H NMR}$  (500 MHz,  $\text{CDCl}_3$ ):  $\delta$  7.81 (d,  $J = 7.7$  Hz, 1H), 7.66-7.63 (m, 3H), 7.52 (d,  $J = 7.8$  Hz, 1H), 7.43-7.40 (m, 1H), 7.22 (d,  $J = 8.2$  Hz, 2H), 3.94-3.84 (m, 5H), 2.38 (s, 3H);  $^{13}\text{C NMR}$  (125 MHz,  $\text{CDCl}_3$ ):  $\delta$  196.8, 169.2, 152.3, 149.6, 142.4, 135.9, 134.6, 129.7, 128.2, 126.6, 125.3, 123.1, 87.6, 53.3, 36.0, 21.6; HRMS (ESI)  $m/z$   $[\text{M}+\text{Na}]^+$  Calcd for  $\text{C}_{18}\text{H}_{16}\text{N}_2\text{NaO}_3$ : 331.1053, Found 331.1056.

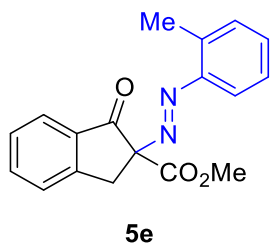

**Methyl (*E*)-1-oxo-2-(*o*-tolyldiazenyl)-2,3-dihydro-1*H*-indene-2-carboxylate (5e).**

Compound **5e** was prepared in 81% yield (75 mg) according to the general procedure.  $R_f = 0.2$  (petroleum ether/ethyl acetate = 8/1); Yellow oil;  $^1\text{H NMR}$  (500 MHz,  $\text{CDCl}_3$ ):  $\delta$  7.81 (d,  $J = 7.7$  Hz, 1H), 7.67-7.64 (m, 1H), 7.53 (d,  $J = 7.8$  Hz, 1H), 7.44-7.40 (m, 2H), 7.34-7.31 (m, 1H), 7.24 (d,  $J = 7.7$  Hz, 1H), 7.20-7.17 (m, 1H), 3.89-3.87 (m, 5H), 2.44 (s, 3H);  $^{13}\text{C NMR}$  (125 MHz,  $\text{CDCl}_3$ ):  $\delta$  196.7,

169.1, 152.0, 149.6, 137.8, 135.9, 134.6, 131.6, 131.2, 128.2, 126.5, 126.5, 125.2, 115.9, 88.3, 53.3, 36.2, 17.2; HRMS (ESI)  $m/z$   $[M+Na]^+$  Calcd for  $C_{18}H_{16}N_2NaO_3$ : 331.1053, Found 331.1054.

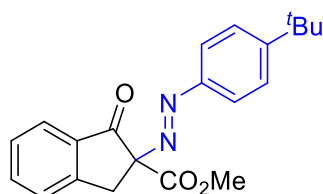

**5f**

**Methyl (*E*)-2-((4-(*tert*-butyl)phenyl)diazenyl)-1-oxo-2,3-dihydro-1*H*-indene-2-carboxylate (5f).**

Compound **5f** was prepared in 84% yield (88 mg) according to the general procedure.  $R_f = 0.2$  (petroleum ether/ethyl acetate = 8/1); Yellow oil;  $^1H$  NMR (500 MHz,  $CDCl_3$ ):  $\delta$  7.81 (d,  $J = 7.7$  Hz, 1H), 7.68-7.63 (m, 3H), 7.52 (d,  $J = 7.7$  Hz, 1H), 7.46-7.40 (m, 3H), 3.95-3.84 (m, 5H), 1.32 (s, 9H);  $^{13}C$  NMR (125 MHz,  $CDCl_3$ ):  $\delta$  196.8, 169.2, 155.4, 152.3, 149.4, 135.9, 128.2, 126.6, 126.0, 125.3, 122.8, 87.6, 53.3, 36.0, 35.1, 31.3; HRMS (ESI)  $m/z$   $[M+Na]^+$  Calcd for  $C_{21}H_{22}N_2NaO_3$ : 373.1523, Found 373.1530.

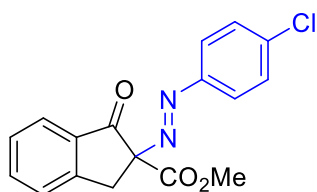

**5g**

**Methyl (*E*)-2-((4-chlorophenyl)diazenyl)-1-oxo-2,3-dihydro-1*H*-indene-2-carboxylate (5g).**

Compound **5g** was prepared in 80% yield (79 mg) according to the general procedure.  $R_f = 0.2$  (petroleum ether/ethyl acetate = 12/1); Yellow oil;  $^1H$  NMR (500 MHz,  $CDCl_3$ ):  $\delta$  7.82 (d,  $J = 7.7$  Hz, 1H), 7.70-7.65 (m, 3H), 7.53 (d,  $J = 7.7$  Hz, 1H), 7.45-7.40 (m, 3H), 3.94-3.85 (m, 5H);  $^{13}C$  NMR (125 MHz,  $CDCl_3$ ):  $\delta$  196.3, 168.9, 152.2, 149.8, 137.9, 136.1, 134.4, 129.3, 128.3, 126.6, 125.4, 124.3, 87.8, 53.4, 36.1; HRMS (ESI)  $m/z$   $[M+Na]^+$  Calcd for  $C_{17}H_{13}ClN_2NaO_3$ : 351.0507, Found 351.0512.

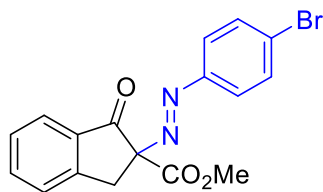

**5h**

**Methyl (*E*)-2-((4-bromophenyl)diazenyl)-1-oxo-2,3-dihydro-1*H*-indene-2-carboxylate (5h).**

Compound **5h** was prepared in 82% yield (92 mg) according to the general procedure.  $R_f = 0.2$  (petroleum ether/ethyl acetate = 12/1); Yellow oil;  $^1\text{H NMR}$  (500 MHz,  $\text{CDCl}_3$ ):  $\delta$  7.81 (d,  $J = 7.8$  Hz, 1H), 7.68-7.65 (m, 1H), 7.62-7.56 (m, 4H), 7.53 (d,  $J = 7.7$  Hz, 1H), 7.45-7.42 (m, 1H), 3.94-3.85 (m, 5H);  $^{13}\text{C NMR}$  (125 MHz,  $\text{CDCl}_3$ ):  $\delta$  196.3, 168.9, 152.2, 150.2, 136.1, 134.4, 132.4, 128.4, 126.6, 126.4, 125.4, 124.6, 87.9, 53.4, 36.1; HRMS (ESI)  $m/z$   $[\text{M}+\text{Na}]^+$  Calcd for  $\text{C}_{17}\text{H}_{13}\text{BrN}_2\text{NaO}_3$ : 395.0002, Found 395.0004.

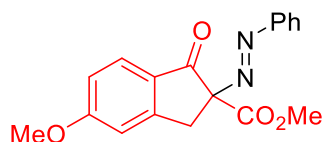

**5i**

**Methyl (*E*)-5-methoxy-1-oxo-2-(phenyldiazenyl)-2,3-dihydro-1*H*-indene-2-carboxylate (5i).**

Compound **5i** was prepared in 78% yield (76 mg) according to the general procedure.  $R_f = 0.2$  (petroleum ether/ethyl acetate = 10/1); Yellow oil;  $^1\text{H NMR}$  (500 MHz,  $\text{CDCl}_3$ ):  $\delta$  7.75-7.72 (m, 3H), 7.44-7.43 (m, 3H), 6.95-6.94 (m, 2H), 3.91 (s, 3H), 3.87-3.78 (m, 5H);  $^{13}\text{C NMR}$  (125 MHz,  $\text{CDCl}_3$ ):  $\delta$  194.5, 169.2, 166.4, 155.5, 151.6, 131.6, 129.0, 127.6, 127.2, 123.0, 116.4, 109.7, 88.2, 55.9, 53.3, 35.8; HRMS (ESI)  $m/z$   $[\text{M}+\text{Na}]^+$  Calcd for  $\text{C}_{18}\text{H}_{16}\text{N}_2\text{NaO}_4$ : 347.1002, Found 347.1008.

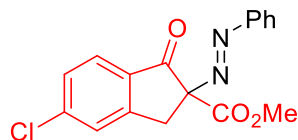

**5j**

**Methyl (*E*)-5-chloro-1-oxo-2-(phenyldiazenyl)-2,3-dihydro-1*H*-indene-2-carboxylate (5j).**

Compound **5j** was prepared in 70% yield (69 mg) according to the general procedure.  $R_f = 0.2$  (petroleum ether/ethyl acetate = 10/1); Yellow oil;  $^1\text{H NMR}$  (500 MHz,  $\text{CDCl}_3$ ):  $\delta$  7.75-7.72 (m, 3H), 7.53 (s, 1H), 7.45-7.40 (m, 4H), 3.93-3.82 (m, 5H);  $^{13}\text{C NMR}$  (125 MHz,  $\text{CDCl}_3$ ):  $\delta$  195.2, 168.7,

153.7, 151.4, 142.7, 132.9, 131.9, 129.2, 129.1, 126.9, 126.4, 123.1, 87.8, 53.5, 36.6; HRMS (ESI)  $m/z$   $[M+Na]^+$  Calcd for  $C_{17}H_{13}ClN_2NaO_3$ : 351.0507, Found 351.0512.

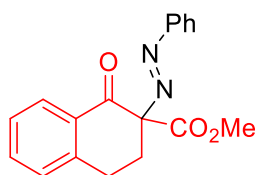

**5k**

**Methyl (*E*)-1-oxo-2-(phenyldiazenyl)-1,2,3,4-tetrahydronaphthalene-2-carboxylate (**5k**).<sup>32</sup>**

Compound **5k** was prepared in 70% yield (65 mg) according to the general procedure.  $R_f$  = 0.2 (petroleum ether/ethyl acetate = 12/1); Yellow oil;  $^1H$  NMR (500 MHz,  $CDCl_3$ ):  $\delta$  8.10 (d,  $J$  = 7.9 Hz, 1H), 7.71-7.69 (m, 2H), 7.52-7.43 (m, 4H), 7.36-7.33 (m, 1H), 7.23 (d,  $J$  = 7.7 Hz, 1H), 3.80 (s, 3H), 3.13-3.05 (m, 2H), 2.99-2.93 (m, 2H);  $^{13}C$  NMR (125 MHz,  $CDCl_3$ ):  $\delta$  191.6, 168.7, 151.6, 142.9, 134.0, 131.9, 131.6, 129.1, 128.9, 128.2, 127.2, 122.9, 85.2, 53.0, 31.1, 25.1; HRMS (ESI)  $m/z$   $[M+Na]^+$  Calcd for  $C_{18}H_{16}N_2NaO_3$ : 331.1053, Found 331.1056. Analytical data for **5k** was consistent with that previously reported.<sup>32</sup>

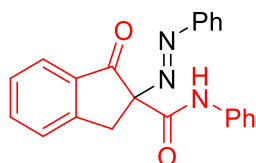

**5l**

**(*E*)-1-oxo-*N*-phenyl-2-(phenyldiazenyl)-2,3-dihydro-1*H*-indene-2-carboxamide (**5l**).**

Compound **5l** was prepared in 43% yield (46 mg) according to the general procedure.  $R_f$  = 0.2 (petroleum ether/ethyl acetate = 5/1); Yellow oil;  $^1H$  NMR (500 MHz,  $CDCl_3$ ):  $\delta$  9.43 (s, 1H), 7.77-7.72 (m, 3H), 7.69-7.65 (m, 3H), 7.60 (d,  $J$  = 7.8 Hz, 1H), 7.48-7.46 (m, 3H), 7.42-7.39 (m, 1H), 7.37-7.34 (m, 2H), 7.16-7.13 (m, 1H), 4.20 (d,  $J$  = 17.6 Hz, 1H), 3.97 (d,  $J$  = 17.6 Hz, 1H);  $^{13}C$  NMR (125 MHz,  $CDCl_3$ ):  $\delta$  198.2, 164.2, 154.1, 151.3, 137.7, 136.4, 133.4, 132.1, 129.3, 129.2, 128.1, 126.7, 125.5, 124.9, 123.0, 120.3, 90.0, 33.4; HRMS (ESI)  $m/z$   $[M+Na]^+$  Calcd for  $C_{22}H_{17}N_3NaO_2$ : 378.1213, Found 378.1206.

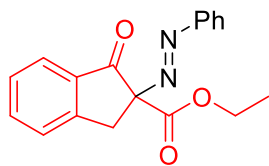

**5m**

**Ethyl (*E*)-1-oxo-2-(phenyldiazenyl)-2,3-dihydro-1*H*-indene-2-carboxylate (5m).**

Compound **5m** was prepared in 80% yield (74 mg) according to the general procedure.  $R_f = 0.2$  (petroleum ether/ethyl acetate = 10/1); Yellow oil;  $^1\text{H NMR}$  (500 MHz,  $\text{CDCl}_3$ ):  $\delta$  7.82 (d,  $J = 7.7$  Hz, 1H), 7.74-7.72 (m, 2H), 7.67-7.64 (m, 1H), 7.53 (d,  $J = 7.7$  Hz, 1H), 7.45-7.41 (m, 4H), 4.33 (q,  $J = 7.1$  Hz, 2H), 3.94 (d,  $J = 17.6$  Hz, 1H), 3.86 (d,  $J = 17.5$  Hz, 1H), 1.29 (t,  $J = 7.1$  Hz, 3H);  $^{13}\text{C NMR}$  (125 MHz,  $\text{CDCl}_3$ ):  $\delta$  196.7, 168.5, 152.3, 151.6, 135.9, 134.7, 131.7, 129.1, 128.2, 126.6, 125.3, 123.0, 87.7, 62.4, 36.0, 14.3; HRMS (ESI)  $m/z$   $[\text{M}+\text{Na}]^+$  Calcd for  $\text{C}_{18}\text{H}_{16}\text{N}_2\text{NaO}_3$ : 331.1053, Found 331.1055.

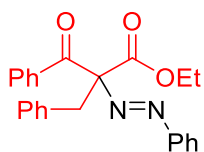

**5n**

**Ethyl (*E*)-2-benzyl-3-oxo-3-phenyl-2-(phenyldiazenyl)propanoate (5n).**

Compound **5n** was prepared in 72% yield (83 mg) according to the general procedure.  $R_f = 0.2$  (petroleum ether/ethyl acetate = 15/1); Yellow oil;  $^1\text{H NMR}$  (500 MHz,  $\text{CDCl}_3$ ):  $\delta$  7.74-7.69 (m, 4H), 7.46-7.42 (m, 4H), 7.36-7.33 (m, 2H), 7.21-7.19 (m, 3H), 7.14-7.12 (m, 2H), 4.16-4.03 (m, 2H), 3.79 (d,  $J = 14.0$  Hz, 1H), 3.65 (d,  $J = 14.0$  Hz, 1H), 0.98 (t,  $J = 7.1$  Hz, 3H);  $^{13}\text{C NMR}$  (125 MHz,  $\text{CDCl}_3$ ):  $\delta$  192.9, 169.6, 151.9, 135.3, 134.7, 132.9, 131.9, 130.7, 129.7, 129.2, 128.5, 128.2, 127.1, 122.8, 88.9, 61.7, 42.7, 13.8; HRMS (ESI)  $m/z$   $[\text{M}+\text{H}]^+$  Calcd for  $\text{C}_{24}\text{H}_{23}\text{N}_2\text{O}_3$ : 387.1703, Found 387.1706.

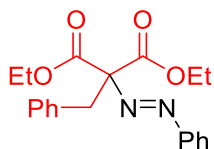

**5o**

**Diethyl (*E*)-2-benzyl-2-(phenyldiazenyl)malonate (5o).**

Compound **5o** was prepared in 59% yield (63 mg) according to the general procedure.  $R_f = 0.2$  (petroleum ether/ethyl acetate = 15/1); Yellow oil;  $^1\text{H NMR}$  (500 MHz,  $\text{CDCl}_3$ ):  $\delta$  7.75-7.73 (m, 2H), 7.49-7.47 (m, 3H), 7.25-7.20 (m, 5H), 4.28-4.20 (m, 4H), 3.58 (s, 2H), 1.22 (t,  $J = 7.2$  Hz, 6H);  $^{13}\text{C NMR}$  (125 MHz,  $\text{CDCl}_3$ ):  $\delta$  168.0, 151.6, 135.0, 131.8, 130.8, 129.2, 128.2, 127.1, 123.0, 86.1, 61.9, 41.7, 14.2; HRMS (ESI)  $m/z$   $[\text{M}+\text{Na}]^+$  Calcd for  $\text{C}_{20}\text{H}_{22}\text{N}_2\text{NaO}_4$ : 377.1472, Found 377.1477.

## Calculated energies and details of optimized structures

**Table S5** Calculated thermodynamic corrections to Gibbs free energy ( $\Delta G_{\text{cor}}$ ), solution-phase single-point energies ( $\Delta E_{\text{sol}}$ ), solution-phase Gibbs free energies ( $\Delta G_{\text{sol}}$ ) and imaginary frequencies (ImF, in  $\text{cm}^{-1}$ ). All  $\Delta G_{\text{sol}}$  refer to 1 M and 298.15 K except the  $\Delta G_{\text{sol}}$  of  $\text{CO}_2$  refers to  $9.59 \times 10^{-3}$  M and 298.15 K (in Hartree).

| species              | $\Delta G_{\text{cor}}$ | $\Delta E_{\text{sol}}$ | $\Delta G_{\text{sol}}$ | ImF     |
|----------------------|-------------------------|-------------------------|-------------------------|---------|
| Energies in DMF      |                         |                         |                         |         |
| <b>4a</b>            | 0.152166                | -650.8167188            | -650.6615409            | N.A.    |
| $\text{HCO}_3^-$     | 0.001223                | -264.542819             | -264.5385841            | N.A.    |
| $\text{CO}_2$        | -0.008939               | -188.5768283            | -188.5827554            | N.A.    |
| $\text{H}_2\text{O}$ | 0.003561                | -76.42929907            | -76.42272616            | N.A.    |
| <b>int1</b>          | 0.138851                | -650.3341203            | -650.1922574            | N.A.    |
| <b>1a</b>            | 0.111528                | -929.5043847            | -929.3898448            | N.A.    |
| <b>TS1</b>           | 0.277695                | -1579.854556            | -1579.573849            | -252.66 |
| <b>int2</b>          | 0.279864                | -1579.883882            | -1579.601006            | N.A.    |
| <b>TS2</b>           | 0.274027                | -1579.840232            | -1579.563193            | -162.20 |
| $\text{MeSO}_2^-$    | 0.018047                | -588.6125196            | -588.5914607            | N.A.    |
| <b>int3</b>          | 0.235379                | -991.2327021            | -990.9943112            | N.A.    |
| <b>TS3</b>           | 0.235035                | -991.2086747            | -990.9706278            | -246.76 |
| <b>int4</b>          | 0.236746                | -991.2236264            | -990.9838685            | N.A.    |
| <b>TS4</b>           | 0.23499                 | -991.2098408            | -990.9718389            | -377.35 |
| <b>int5</b>          | 0.236967                | -991.2470167            | -991.0070378            | N.A.    |
| <b>TS5</b>           | 0.234463                | -991.2027097            | -990.9652348            | -372.93 |
| <b>int6</b>          | 0.234264                | -991.2430347            | -991.0057588            | N.A.    |
| <b>TS6</b>           | 0.234305                | -991.2092943            | -990.9719774            | -419.64 |
| <b>5a</b>            | 0.232644                | -991.2704892            | -991.0348333            | N.A.    |
| <b>TS7</b>           | 0.279805                | -1579.848858            | -1579.566041            | -193.21 |



|                                |           |              |              |          |
|--------------------------------|-----------|--------------|--------------|----------|
| <b>int7</b>                    | 0.277783  | -1579.87434  | -1579.593546 | N.A.     |
| <b>TS8</b>                     | 0.275879  | -1579.868556 | -1579.589666 | -337.82  |
| Energies in ethanol            |           |              |              |          |
| <b>2a</b>                      | 0.077173  | -307.4378147 | -307.3576298 | N.A.     |
| CO <sub>3</sub> <sup>2-</sup>  | -0.010966 | -264.0626113 | -264.0705654 | N.A.     |
| HCO <sub>3</sub> <sup>-</sup>  | 0.001244  | -264.5574293 | -264.5531734 | N.A.     |
| <b>1a</b>                      | 0.110649  | -929.5049772 | -929.3913163 | N.A.     |
| <b>int8</b>                    | 0.06392   | -306.9572968 | -306.8903649 | N.A.     |
| <b>TS9</b>                     | 0.200451  | -1236.462463 | -1236.259    | -391.38  |
| <b>int9</b>                    | 0.19947   | -1236.47255  | -1236.270068 | N.A.     |
| <b>TS10</b>                    | 0.197077  | -1236.460716 | -1236.260627 | -303.41  |
| <b>TS10b</b>                   | 0.15297   | -647.7757022 | -647.6197203 | -1899.30 |
| <b>int10</b>                   | 0.192543  | -1236.500366 | -1236.304811 | N.A.     |
| <b>TS11</b>                    | 0.19095   | -1236.49538  | -1236.301418 | -614.12  |
| MeSO <sub>2</sub> H            | 0.029224  | -589.0880479 | -589.055812  | N.A.     |
| <b>int11</b>                   | 0.145705  | -647.4343557 | -647.2856388 | N.A.     |
| MeSO <sub>2</sub> <sup>-</sup> | 0.018272  | -588.6290134 | -588.6077295 | N.A.     |
| <b>3a</b>                      | 0.157722  | -647.905991  | -647.7452571 | N.A.     |
| <b>TS12</b>                    | 0.200862  | -1236.46604  | -1236.262166 | -377.88  |
| <b>int12</b>                   | 0.200891  | -1236.490162 | -1236.286259 | N.A.     |
| <b>TS13</b>                    | 0.195766  | -1236.4476   | -1236.248822 | -1755.65 |
| <b>int13</b>                   | 0.201423  | -1236.522237 | -1236.317802 | N.A.     |
| <b>TS14</b>                    | 0.199124  | -1236.49308  | -1236.290944 | -163.64  |
| <b>int14</b>                   | 0.160304  | -647.8657077 | -647.7023918 | N.A.     |
| <b>TS15</b>                    | 0.157724  | -647.8052703 | -647.6445344 | -642.01  |

|              |          |              |              |          |
|--------------|----------|--------------|--------------|----------|
| <b>TS16</b>  | 0.198234 | -1236.45099  | -1236.249745 | -226.21  |
| <b>int15</b> | 0.157796 | -647.8285187 | -647.6677108 | N.A.     |
| <b>TS17</b>  | 0.153689 | -647.7294266 | -647.5727257 | -415.66  |
| <b>int16</b> | 0.15967  | -647.8528325 | -647.6901505 | N.A.     |
| <b>TS18</b>  | 0.157972 | -647.8136869 | -647.652703  | -326.39  |
| <b>int17</b> | 0.159613 | -647.8803507 | -647.7177258 | N.A.     |
| <b>int18</b> | 0.213642 | -1236.99956  | -1236.782906 | N.A.     |
| <b>int19</b> | 0.172718 | -648.3221448 | -648.3191329 | N.A.     |
| <b>TS19</b>  | 0.171034 | -647.7254833 | -647.5514374 | -726.45  |
| <b>int20</b> | 0.171867 | -648.277722  | -648.1028431 | N.A.     |
| <b>TS20</b>  | 0.15297  | -647.7757022 | -647.6197203 | -1899.30 |
| <b>int21</b> | 0.157798 | -647.8285182 | -647.6677083 | N.A.     |
| <b>TS21</b>  | 0.154346 | -647.7277093 | -647.5703514 | -413.14  |
| <b>int22</b> | 0.156013 | -647.8644779 | -647.705453  | N.A.     |

### Cartesian coordinates of calculated stationary points (in angstrom)

|           |            |             |             |                                           |             |             |             |
|-----------|------------|-------------|-------------|-------------------------------------------|-------------|-------------|-------------|
| <b>4a</b> |            |             |             | H                                         | 4.19069600  | 0.73343500  | 1.24793000  |
| C         | 1.45326400 | -0.81286100 | -0.22519100 |                                           |             |             |             |
| C         | 1.31194400 | 0.56654400  | -0.09180300 | <b>HCO<sub>3</sub><sup>-</sup> in DMF</b> |             |             |             |
| C         | 2.38754400 | 1.39986500  | 0.21829500  | C                                         | 0.00000000  | 0.15636600  | 0.00000000  |
| C         | 3.63665400 | 0.81637300  | 0.38487900  | O                                         | 1.21716600  | 0.43479900  | 0.00000000  |
| C         | 3.79011000 | -0.57100800 | 0.24585400  | O                                         | -0.28637800 | -1.22892000 | 0.00000000  |
| C         | 2.70786400 | -1.39502800 | -0.05663300 | O                                         | -1.00456300 | 0.88204600  | 0.00000000  |
| C         | 0.13420000 | -1.48781700 | -0.52497100 | H                                         | 0.59020700  | -1.64159500 | 0.00000000  |
| C         | 0.86052000 | -0.33278900 | -0.72442800 |                                           |             |             |             |
| C         | 0.09723400 | 0.95106900  | -0.31077400 | <b>CO<sub>2</sub></b>                     |             |             |             |
| H         | 2.24190800 | 2.47153800  | 0.31919400  | C                                         | 0.00000000  | 0.00000000  | 0.00000000  |
| H         | 4.49946600 | 1.43061900  | 0.62181300  | O                                         | 0.00000000  | 0.00000000  | 1.16279700  |
| H         | 4.77402500 | -1.01121200 | 0.37862600  | O                                         | 0.00000000  | 0.00000000  | -1.16279700 |
| H         | 2.84225900 | -2.46820500 | -0.15669500 |                                           |             |             |             |
| H         | 0.19891200 | -2.12755600 | -1.40888900 | <b>H<sub>2</sub>O</b>                     |             |             |             |
| O         | 0.58911700 | 2.05021300  | -0.19270600 | O                                         | 0.00000000  | 0.00000000  | 0.11976300  |
| H         | 0.17279400 | -2.11413200 | 0.31865600  | H                                         | 0.00000000  | 0.76112300  | -0.47905200 |
| H         | 1.14233600 | -0.20583700 | -1.77396800 | H                                         | 0.00000000  | -0.76112300 | -0.47905200 |
| C         | 2.11467100 | -0.44071500 | 0.11164500  |                                           |             |             |             |
| O         | 2.17652700 | -0.98693700 | 1.18903900  | <b>Int1</b>                               |             |             |             |
| O         | 3.14293400 | 0.18285300  | -0.46417300 | C                                         | 1.31143700  | -0.86366600 | -0.00032300 |
| C         | 4.35044600 | 0.20594900  | 0.30493900  | C                                         | 1.43942100  | 0.52642500  | -0.00012800 |
| H         | 4.69295800 | -0.81063600 | 0.50932600  | C                                         | 2.68799500  | 1.13875900  | 0.00032400  |
| H         | 5.08141800 | 0.73546800  | -0.30415100 | C                                         | 3.82697400  | 0.33310300  | 0.00060000  |

|                  |             |             |             |            |             |             |             |
|------------------|-------------|-------------|-------------|------------|-------------|-------------|-------------|
| C                | 3.70470300  | -1.06078400 | 0.00038400  | C          | -1.26891400 | 0.84711100  | 0.76750400  |
| C                | 2.44609400  | -1.66923300 | -0.00009300 | C          | -3.11264100 | -0.71233400 | -0.64223100 |
| C                | -0.15169200 | -1.24207700 | -0.00065900 | H          | -1.81253100 | -2.38187800 | -0.18341400 |
| C                | -0.85091900 | 0.10054500  | -0.00057400 | C          | -2.41620300 | 1.42819500  | 0.23690000  |
| C                | 0.07882100  | 1.17751100  | -0.00033100 | H          | -0.55828500 | 1.43411900  | 1.34137800  |
| H                | 2.75965300  | 2.22361600  | 0.00041600  | C          | -3.33016300 | 0.65569700  | -0.47825600 |
| H                | 4.81525200  | 0.78456900  | 0.00100900  | H          | -3.82933600 | -1.31708500 | -1.18856100 |
| H                | 4.59952700  | -1.67698200 | 0.00062000  | H          | -2.59340700 | 2.48894900  | 0.38310400  |
| H                | 2.36175700  | -2.75367800 | -0.00026900 | H          | -4.21952000 | 1.11684600  | -0.89560500 |
| H                | -0.39207600 | -1.86294100 | 0.87512800  | O          | 0.85742400  | 0.45546800  | -1.33260900 |
| O                | -0.06531100 | 2.41232000  | -0.00020800 | O          | 2.96622500  | -0.81052400 | -0.80256600 |
| C                | -2.26698700 | 0.24233500  | -0.00031300 | C          | 2.49792100  | 1.42918400  | 0.53202200  |
| O                | -2.89399300 | -0.99064400 | -0.00047500 | H          | 3.10955200  | 1.05973400  | 1.35734900  |
| O                | -2.94348000 | 1.26605600  | 0.00012900  | H          | 3.11298400  | 2.00085400  | -0.16886300 |
| C                | -4.30834300 | -0.93820100 | 0.00107500  | H          | 1.66555400  | 2.03523100  | 0.89348600  |
| H                | -4.65281000 | -1.97423100 | 0.00151800  |            |             |             |             |
| H                | -4.69015000 | -0.42380200 | 0.88858300  | <b>TS1</b> |             |             |             |
| H                | -4.69215200 | -0.42397800 | -0.88566200 | C          | 1.46393600  | -1.31805200 | -1.23545500 |
| H                | -0.39174900 | -1.86272500 | -0.87667900 | C          | 1.97951500  | -1.34737900 | 0.06074600  |
|                  |             |             |             | C          | 3.34642500  | -1.33121500 | 0.31141400  |
| <b>1a in DMF</b> |             |             |             | C          | 4.21422200  | -1.27707600 | -0.77926000 |
| N                | 0.03597000  | -1.17231400 | 1.23417700  | C          | 3.70611000  | -1.24658300 | -2.08284300 |
| N                | 1.22257100  | -0.97560400 | 1.03865600  | C          | 2.32922700  | -1.26776000 | -2.32297400 |
| S                | 1.86153600  | 0.03403800  | -0.36146500 | C          | -0.05022800 | -1.29728200 | -1.19587300 |
| C                | -1.05900600 | -0.51720900 | 0.57563700  | C          | -0.35468600 | -1.09267900 | 0.26083400  |
| C                | -1.98742500 | -1.31489400 | -0.08888500 | C          | 0.85650800  | -1.31551900 | 1.04467500  |

|   |             |             |             |             |             |             |             |
|---|-------------|-------------|-------------|-------------|-------------|-------------|-------------|
| H | 3.71713100  | -1.34439500 | 1.33304700  | H           | 3.51473800  | 2.61441600  | -1.11065100 |
| H | 5.28842300  | -1.25290700 | -0.62145100 | H           | 4.39436000  | 2.62425900  | 1.21390200  |
| H | 4.39475900  | -1.20157400 | -2.92182600 | O           | -3.15146000 | -0.08435000 | -1.03735200 |
| H | 1.94826500  | -1.23548400 | -3.34055200 | O           | -3.19065800 | 2.28278700  | -1.84919300 |
| H | -0.48463000 | -2.22335200 | -1.59013500 | C           | -3.32174800 | 1.82313600  | 0.75835400  |
| O | 0.98521200  | -1.44270900 | 2.26008300  | H           | -2.97602200 | 2.83894800  | 0.95805600  |
| C | -1.63912700 | -1.49741100 | 0.85654700  | H           | -4.41318700 | 1.79275900  | 0.71978800  |
| O | -2.25158100 | -2.46330800 | 0.13927600  | H           | -2.93676100 | 1.12100500  | 1.49910900  |
| O | -2.10237300 | -1.08112200 | 1.90027600  |             |             |             |             |
| C | -3.56670500 | -2.78649000 | 0.57107700  | <b>Int2</b> |             |             |             |
| H | -3.95088600 | -3.51325600 | -0.14572500 | C           | 2.70636200  | -0.37087400 | -0.38720100 |
| H | -3.55644600 | -3.22316000 | 1.57362100  | C           | 2.40904000  | -0.74846000 | 0.92022500  |
| H | -4.19415600 | -1.89207400 | 0.57135200  | C           | 3.38565300  | -0.82366700 | 1.91319200  |
| H | -0.46137700 | -0.47066700 | -1.80177200 | C           | 4.69418200  | -0.50610200 | 1.57059900  |
| N | -0.59756900 | 1.04110300  | 0.34001600  | C           | 5.00364500  | -0.12420600 | 0.25730300  |
| N | -1.07041800 | 1.45919800  | -0.80570700 | C           | 4.02055800  | -0.05517800 | -0.72830900 |
| S | -2.73822000 | 1.31329300  | -0.84730200 | C           | 1.48563400  | -0.37128000 | -1.27299300 |
| C | 0.75980900  | 1.46387100  | 0.51212900  | C           | 0.30864100  | -0.77486800 | -0.34570300 |
| C | 1.25005200  | 1.48051100  | 1.82088200  | C           | 0.96360500  | -1.02847200 | 1.04343400  |
| C | 1.57680600  | 1.88588400  | -0.54373900 | H           | 3.11892300  | -1.12091100 | 2.92351900  |
| C | 2.55524700  | 1.89610900  | 2.06960000  | H           | 5.48141600  | -0.55095300 | 2.31668600  |
| H | 0.59956400  | 1.15110400  | 2.62334400  | H           | 6.03071800  | 0.12292100  | 0.00444600  |
| C | 2.88114200  | 2.29627400  | -0.28766900 | H           | 4.27656300  | 0.24188400  | -1.74152900 |
| H | 1.18342100  | 1.88422600  | -1.55434700 | H           | 1.61162800  | -1.08109700 | -2.09700700 |
| C | 3.37631700  | 2.30141100  | 1.01779000  | O           | 0.37053900  | -1.35994700 | 2.04463800  |
| H | 2.93018300  | 1.90648000  | 3.08877700  | C           | -0.31637200 | -2.06781800 | -0.86388200 |

|   |             |             |             |            |             |             |             |
|---|-------------|-------------|-------------|------------|-------------|-------------|-------------|
| O | -0.76493200 | -1.92247700 | -2.11705300 | H          | -2.46836200 | 2.25666900  | -1.15695600 |
| O | -0.35815100 | -3.11261500 | -0.26073200 |            |             |             |             |
| C | -1.38337400 | -3.08263600 | -2.68141000 | <b>TS2</b> |             |             |             |
| H | -1.71461500 | -2.78805100 | -3.67619400 | C          | -2.19057700 | 0.61340500  | -0.97272000 |
| H | -0.66660400 | -3.90401000 | -2.74834500 | C          | -2.23870700 | 0.42485100  | 0.40655000  |
| H | -2.23735100 | -3.39396700 | -2.07406000 | C          | -3.29939700 | -0.23308700 | 1.02386400  |
| H | 1.28693200  | 0.61392200  | -1.70411000 | C          | -4.32813600 | -0.71343500 | 0.22073000  |
| N | -0.68192800 | 0.32169800  | -0.23813600 | C          | -4.28447600 | -0.53105300 | -1.16845400 |
| N | -0.00781800 | 1.45814200  | 0.33694900  | C          | -3.21944400 | 0.13204900  | -1.77745400 |
| S | -0.18971900 | 2.73185300  | -0.62412700 | C          | -0.94383200 | 1.36504100  | -1.38352700 |
| C | -1.88813200 | -0.01082100 | 0.46905000  | C          | -0.06033300 | 1.35454400  | -0.11676400 |
| C | -2.88415400 | -0.74612400 | -0.18819600 | C          | -1.03427400 | 1.01627500  | 1.03491000  |
| C | -2.14246000 | 0.45054200  | 1.76689400  | H          | -3.30287100 | -0.37500000 | 2.10027100  |
| C | -4.08287100 | -1.05218000 | 0.45351000  | H          | -5.16719100 | -1.23915900 | 0.66581700  |
| H | -2.72984600 | -1.04704700 | -1.21868400 | H          | -5.09387600 | -0.91708800 | -1.78125500 |
| C | -3.34625000 | 0.15248400  | 2.39775500  | H          | -3.19376000 | 0.26494800  | -2.85536200 |
| H | -1.38535300 | 1.04515800  | 2.26216100  | H          | -1.19994700 | 2.39889700  | -1.64484200 |
| C | -4.32175000 | -0.60766500 | 1.75153000  | O          | -0.83196400 | 1.22317200  | 2.20648400  |
| H | -4.84087800 | -1.62084900 | -0.07779300 | C          | 0.61116000  | 2.70669900  | 0.06301600  |
| H | -3.52240300 | 0.51502100  | 3.40687600  | O          | 1.71068100  | 2.81683800  | -0.68738600 |
| H | -5.26032200 | -0.83502700 | 2.24768700  | O          | 0.15491100  | 3.60991900  | 0.72092800  |
| O | 0.20973100  | 2.53137200  | -2.03693700 | C          | 2.36564700  | 4.08632400  | -0.62016600 |
| O | 0.45086900  | 3.87048200  | 0.05983600  | H          | 3.23993700  | 4.00372200  | -1.26438000 |
| C | -1.94263400 | 3.10641700  | -0.71513500 | H          | 1.70426900  | 4.87856600  | -0.97863700 |
| H | -2.32123600 | 3.29945500  | 0.29062600  | H          | 2.67074200  | 4.30430200  | 0.40573200  |
| H | -2.07586600 | 3.98927400  | -1.34499900 | H          | -0.44167500 | 0.92918500  | -2.25021500 |

|                                            |             |             |             |             |             |             |             |
|--------------------------------------------|-------------|-------------|-------------|-------------|-------------|-------------|-------------|
| N                                          | 1.01959700  | 0.30208800  | -0.08990200 | H           | 2.04740100  | 0.89403700  | -0.25149000 |
| N                                          | 1.85450900  | 0.31757300  | 0.84961500  | H           | 1.55356700  | -0.00297700 | 1.21779100  |
| S                                          | 1.01567100  | -1.35436100 | 2.26424900  | H           | 2.04740300  | -0.89635100 | -0.25378200 |
| C                                          | 1.10273500  | -0.67946200 | -1.15652600 |             |             |             |             |
| C                                          | 0.11658900  | -1.64698200 | -1.34721800 | <b>Int3</b> |             |             |             |
| C                                          | 2.24444200  | -0.65972000 | -1.95663500 | C           | -1.69963800 | -0.78577700 | -0.85470000 |
| C                                          | 0.27859500  | -2.59070000 | -2.36112000 | C           | -1.92915800 | -0.78797200 | 0.52160200  |
| H                                          | -0.73091100 | -1.67890000 | -0.67293300 | C           | -2.95088000 | -1.53913600 | 1.10428800  |
| C                                          | 2.40019900  | -1.60971200 | -2.96251600 | C           | -3.76440400 | -2.29043100 | 0.26666100  |
| H                                          | 2.99958000  | 0.09996400  | -1.77726100 | C           | -3.54457100 | -2.28846200 | -1.11845600 |
| C                                          | 1.41423900  | -2.57468100 | -3.16964500 | C           | -2.51512400 | -1.54348500 | -1.69060700 |
| H                                          | -0.48338200 | -3.35017100 | -2.51052600 | C           | -0.51803100 | 0.07795400  | -1.23916900 |
| H                                          | 3.28839300  | -1.59320900 | -3.58702600 | C           | -0.14022000 | 0.79309000  | 0.07428900  |
| H                                          | 1.53382500  | -3.31505000 | -3.95483700 | C           | -0.93504000 | 0.06779400  | 1.19506000  |
| O                                          | -0.29273200 | -1.75617200 | 1.62133200  | H           | -3.10127000 | -1.52535900 | 2.17962700  |
| O                                          | 1.05310500  | -1.51364900 | 3.76504000  | H           | -4.57444000 | -2.88217500 | 0.68049900  |
| C                                          | 2.13332900  | -2.67713400 | 1.70373000  | H           | -4.19048500 | -2.88234100 | -1.75822100 |
| H                                          | 3.14084100  | -2.49344700 | 2.08726100  | H           | -2.35366100 | -1.55566100 | -2.76433900 |
| H                                          | 1.75750700  | -3.63023800 | 2.09006800  | H           | -0.77204500 | 0.79053100  | -2.02746400 |
| H                                          | 2.15048800  | -2.69536800 | 0.61062100  | O           | -0.71860100 | 0.19852700  | 2.37480300  |
|                                            |             |             |             | C           | -0.58028300 | 2.26083900  | 0.04808300  |
| <b>MeSO<sub>2</sub><sup>-</sup> in DMF</b> |             |             |             | O           | 0.01394500  | 2.90907000  | -0.94884100 |
| S                                          | -0.22132000 | 0.00012000  | -0.38554500 | O           | -1.39147400 | 2.74258200  | 0.79758400  |
| O                                          | -0.71146200 | -1.26696800 | 0.29525300  | C           | -0.27514800 | 4.31066700  | -1.02300300 |
| O                                          | -0.70809700 | 1.26860900  | 0.29515800  | H           | 0.29126100  | 4.68476800  | -1.87409400 |
| C                                          | 1.54153600  | -0.00162500 | 0.12215100  | H           | -1.34393100 | 4.47195700  | -1.17686800 |

|            |            |             |             |   |             |             |             |
|------------|------------|-------------|-------------|---|-------------|-------------|-------------|
| H          | 0.04539100 | 4.80641100  | -0.10395700 | H | 3.48367800  | -0.25847500 | -2.10109000 |
| H          | 0.30821000 | -0.53348900 | -1.61449200 | H | 5.06676600  | -1.85499400 | -1.02673000 |
| N          | 1.32948500 | 0.83613600  | 0.46311600  | H | 4.64091300  | -2.64714900 | 1.28557900  |
| N          | 1.78518600 | 1.80072800  | 1.04181100  | H | 2.65892500  | -1.83929600 | 2.53892100  |
| C          | 2.14868000 | -0.35206700 | 0.16291400  | H | 1.04329800  | 0.71061500  | 2.39801500  |
| C          | 1.66697400 | -1.64257900 | 0.35316300  | O | 1.55652500  | 1.78752900  | -1.67120900 |
| C          | 3.45268000 | -0.11968800 | -0.26121200 | C | -0.41443300 | 2.13657000  | 0.66015100  |
| C          | 2.51779000 | -2.72074200 | 0.11247400  | O | -1.30126200 | 2.47899700  | -0.29274600 |
| H          | 0.65315100 | -1.82930600 | 0.69395100  | O | 0.02329200  | 2.91475600  | 1.48580600  |
| C          | 4.28889400 | -1.20251300 | -0.50944800 | C | -1.62240300 | 3.86966000  | -0.34833300 |
| H          | 3.79354000 | 0.90281900  | -0.38692800 | H | -2.33243600 | 3.97692400  | -1.16755600 |
| C          | 3.82326700 | -2.50405100 | -0.32127000 | H | -2.07750100 | 4.19923200  | 0.58826400  |
| H          | 2.15327800 | -3.73088300 | 0.26817900  | H | -0.72584600 | 4.46162500  | -0.54567100 |
| H          | 5.30466100 | -1.02914800 | -0.85011300 | H | 0.13653300  | -0.77631200 | 2.09218300  |
| H          | 4.47796000 | -3.34825300 | -0.51264700 | N | -0.62811100 | -0.06165100 | -0.44603100 |
|            |            |             |             | N | -0.00680500 | 0.01960100  | -1.52635000 |
| <b>TS3</b> |            |             |             | C | -1.76927900 | -0.89786900 | -0.25951400 |
| C          | 1.95672300 | -0.59936700 | 0.92678000  | C | -2.63392100 | -0.60386100 | 0.79273000  |
| C          | 2.18690200 | -0.17929400 | -0.38746400 | C | -1.98706200 | -1.96443400 | -1.13148000 |
| C          | 3.31109600 | -0.61445400 | -1.08938600 | C | -3.75569400 | -1.40563900 | 0.97120600  |
| C          | 4.19295700 | -1.50588500 | -0.48531600 | H | -2.43729400 | 0.24029200  | 1.44624100  |
| C          | 3.95061900 | -1.95320900 | 0.81538200  | C | -3.11777800 | -2.74848200 | -0.94314400 |
| C          | 2.83553300 | -1.50423100 | 1.52011200  | H | -1.27520700 | -2.17483100 | -1.92260400 |
| C          | 0.74328500 | 0.00488400  | 1.61624900  | C | -3.99809000 | -2.47094100 | 0.10476300  |
| C          | 0.01292200 | 0.75576600  | 0.55141400  | H | -4.44293600 | -1.19296800 | 1.78284200  |
| C          | 1.21852800 | 0.79370400  | -1.04382500 | H | -3.30651900 | -3.58530700 | -1.60699600 |



|             |             |             |             |            |             |             |             |
|-------------|-------------|-------------|-------------|------------|-------------|-------------|-------------|
| H           | -4.87583800 | -3.09277800 | 0.24850800  | N          | 0.72890000  | 0.63488700  | 0.29350300  |
|             |             |             |             | N          | 0.14491200  | 0.70629100  | 1.47956700  |
| <b>Int4</b> |             |             |             | C          | 2.07143800  | 0.15924100  | 0.20895500  |
| C           | -1.05299900 | -1.23285900 | -0.91633600 | C          | 2.90506000  | 0.65663100  | -0.79240700 |
| C           | -1.46067900 | -0.99612800 | 0.42232300  | C          | 2.50991600  | -0.78465800 | 1.13579700  |
| C           | -2.26819900 | -1.96541200 | 1.03964400  | C          | 4.20763800  | 0.17860900  | -0.87363200 |
| C           | -2.63814200 | -3.13820500 | 0.39541600  | H          | 2.53809000  | 1.41926800  | -1.47282100 |
| C           | -2.21398100 | -3.37069200 | -0.91053200 | C          | 3.82048300  | -1.24077500 | 1.05077500  |
| C           | -1.43010300 | -2.41956700 | -1.55088300 | H          | 1.82342800  | -1.15760200 | 1.88809100  |
| C           | -0.21834000 | -0.23796300 | -1.73132400 | C          | 4.66519300  | -0.76447200 | 0.04754800  |
| C           | -0.02337000 | 0.88933400  | -0.78180800 | H          | 4.87142200  | 0.55627300  | -1.64416900 |
| C           | -1.14878100 | 0.17327800  | 1.39559700  | H          | 4.17914100  | -1.97833100 | 1.76100800  |
| H           | -2.60108800 | -1.78045500 | 2.05475100  | H          | 5.68631000  | -1.12706400 | -0.01473800 |
| H           | -3.25538200 | -3.86604100 | 0.91255200  |            |             |             |             |
| H           | -2.49980900 | -4.27939300 | -1.43146000 | <b>TS4</b> |             |             |             |
| H           | -1.11107200 | -2.58021100 | -2.57755200 | C          | 0.73022000  | -1.34093800 | -1.00365200 |
| H           | -0.74829000 | 0.07916600  | -2.63051500 | C          | 0.75984600  | -1.60940800 | 0.37644500  |
| O           | -1.97634900 | 0.46830900  | 2.23885300  | C          | 1.88200700  | -2.24618800 | 0.92126000  |
| C           | -1.08916200 | 1.92885400  | -0.72313800 | C          | 2.96915400  | -2.58464100 | 0.12575600  |
| O           | -0.78522600 | 2.96485700  | 0.05790500  | C          | 2.94181700  | -2.30092300 | -1.23915900 |
| O           | -2.07888300 | 1.86665800  | -1.42054200 | C          | 1.82741300  | -1.68329600 | -1.79577500 |
| C           | -1.78903500 | 3.98342600  | 0.13088600  | C          | -0.49028600 | -0.72359900 | -1.64930000 |
| H           | -1.40959500 | 4.72026000  | 0.83702400  | C          | -1.25448100 | 0.01349300  | -0.60623000 |
| H           | -1.94231000 | 4.44088400  | -0.84888500 | C          | -0.33754500 | -1.28739200 | 1.37925600  |
| H           | -2.72961600 | 3.56143800  | 0.49192200  | H          | 1.88785000  | -2.46548600 | 1.98403500  |
| H           | 0.72412400  | -0.70687600 | -2.02771400 | H          | 3.83507500  | -3.06682600 | 0.56807700  |

|   |             |             |             |             |             |             |             |
|---|-------------|-------------|-------------|-------------|-------------|-------------|-------------|
| H | 3.78669400  | -2.56056900 | -1.86952700 | <b>Int5</b> |             |             |             |
| H | 1.79660600  | -1.46593700 | -2.85988100 | C           | -1.77921700 | -0.38031600 | -0.74014000 |
| H | -1.14305000 | -1.48292900 | -2.08982700 | C           | -1.83364100 | -1.06803000 | 0.48113100  |
| O | -0.55998000 | -2.06435500 | 2.29310000  | C           | -2.91052500 | -1.90000000 | 0.79426800  |
| C | -2.74594400 | -0.18346800 | -0.50525800 | C           | -3.96153600 | -2.03019100 | -0.10445400 |
| O | -3.36693900 | 0.86560200  | 0.01404700  | C           | -3.92107100 | -1.34041200 | -1.31810200 |
| O | -3.28491100 | -1.17725800 | -0.93378400 | C           | -2.83710000 | -0.52552900 | -1.63641400 |
| C | -4.79011300 | 0.72944000  | 0.12980600  | C           | -0.55621500 | 0.44560200  | -1.08463500 |
| H | -5.13742400 | 1.65765900  | 0.57976400  | C           | 0.03572600  | 1.05585000  | 0.17129100  |
| H | -5.23816200 | 0.59293300  | -0.85673400 | C           | -0.68457400 | -0.95492200 | 1.41696800  |
| H | -5.03811400 | -0.12022900 | 0.76924700  | H           | -2.91313000 | -2.42829500 | 1.74284400  |
| H | -0.19491100 | -0.04062300 | -2.45655900 | H           | -4.80915700 | -2.66393500 | 0.13495100  |
| N | -0.64781300 | 0.76495600  | 0.30883500  | H           | -4.74084000 | -1.43946400 | -2.02303600 |
| N | -1.00810600 | -0.05379000 | 1.39902700  | H           | -2.80917200 | 0.00017300  | -2.58673800 |
| C | 0.47381800  | 1.60162200  | 0.23317500  | H           | -0.82246700 | 1.23687600  | -1.78591600 |
| C | 0.62413000  | 2.42850100  | -0.88438500 | O           | -0.35033200 | -1.80338700 | 2.21410800  |
| C | 1.39494100  | 1.62805500  | 1.28196300  | C           | -0.11806400 | 2.55626600  | 0.38481400  |
| C | 1.72634200  | 3.27148800  | -0.95614100 | O           | -0.08769400 | 3.21184700  | -0.77309600 |
| H | -0.12544000 | 2.41866800  | -1.67077000 | O           | -0.20613500 | 3.07613800  | 1.46699200  |
| C | 2.47634500  | 2.50080100  | 1.20504800  | C           | -0.16632400 | 4.64085300  | -0.67144600 |
| H | 1.26667500  | 0.96750200  | 2.13342300  | H           | -0.14385300 | 5.01081700  | -1.69477300 |
| C | 2.65204200  | 3.31523800  | 0.08763200  | H           | -1.09537800 | 4.93374400  | -0.17864500 |
| H | 1.85232900  | 3.91075300  | -1.82418200 | H           | 0.68605800  | 5.02454500  | -0.10738300 |
| H | 3.19444800  | 2.52909100  | 2.01852500  | H           | 0.18728600  | -0.18580100 | -1.58595700 |
| H | 3.50526400  | 3.98321300  | 0.02982000  | N           | 1.27445600  | 0.58200600  | 0.82616700  |
|   |             |             |             | N           | -0.03993100 | 0.30105900  | 1.37786100  |

|            |             |             |             |             |             |             |             |
|------------|-------------|-------------|-------------|-------------|-------------|-------------|-------------|
| C          | 2.08312400  | -0.43346700 | 0.20742100  | H           | -0.80659800 | 1.73976800  | -1.72521100 |
| C          | 3.41804400  | -0.03955100 | 0.06268700  | O           | -1.11797700 | -1.47075800 | 2.25970300  |
| C          | 1.68532400  | -1.69818100 | -0.23829500 | C           | 0.88843800  | 2.28567000  | 0.34304100  |
| C          | 4.34413000  | -0.88633600 | -0.53374400 | O           | 1.52936500  | 2.61678600  | -0.77490200 |
| H          | 3.71081300  | 0.93981000  | 0.42775100  | O           | 0.90985500  | 2.90564900  | 1.37692300  |
| C          | 2.62544900  | -2.54678800 | -0.82359800 | C           | 2.31732800  | 3.81428700  | -0.69943600 |
| H          | 0.66719200  | -2.05452000 | -0.14671500 | H           | 2.74515000  | 3.94813200  | -1.69117000 |
| C          | 3.94978700  | -2.14845400 | -0.97625300 | H           | 1.68667300  | 4.66602300  | -0.43747100 |
| H          | 5.37493500  | -0.56402100 | -0.64216300 | H           | 3.10809700  | 3.69712600  | 0.04432200  |
| H          | 2.30827100  | -3.52793700 | -1.16250500 | H           | -0.16614500 | 0.08906400  | -1.73577200 |
| H          | 4.67117000  | -2.81860100 | -1.43295000 | N           | 1.30630500  | -0.06479300 | 1.32435400  |
|            |             |             |             | N           | -0.06407500 | 0.19031800  | 1.11108900  |
| <b>TS5</b> |             |             |             | C           | 1.83915100  | -0.99422200 | 0.42687500  |
| C          | -2.08878900 | 0.27351600  | -0.75667800 | C           | 3.24819600  | -1.05654000 | 0.40627300  |
| C          | -2.30333100 | -0.37303800 | 0.47318400  | C           | 1.11620200  | -1.90996900 | -0.36530500 |
| C          | -3.55998400 | -0.88327400 | 0.80272900  | C           | 3.90699200  | -1.98871800 | -0.37918700 |
| C          | -4.61884200 | -0.74077100 | -0.08432300 | H           | 3.80080400  | -0.35449800 | 1.02372700  |
| C          | -4.41244300 | -0.10174900 | -1.30784500 | C           | 1.79388600  | -2.83350300 | -1.15933200 |
| C          | -3.15677300 | 0.39856600  | -1.64322600 | H           | 0.03084100  | -1.93219400 | -0.35254000 |
| C          | -0.72417100 | 0.83015000  | -1.12636100 | C           | 3.18490500  | -2.88297000 | -1.17545400 |
| C          | 0.05772400  | 1.05754800  | 0.10551300  | H           | 4.99272800  | -2.01703400 | -0.37697100 |
| C          | -1.16336700 | -0.62410300 | 1.39548800  | H           | 1.21854000  | -3.53205700 | -1.75984400 |
| H          | -3.68909700 | -1.38957000 | 1.75420300  | H           | 3.70158300  | -3.61228000 | -1.79080600 |
| H          | -5.59972600 | -1.12745200 | 0.17153500  |             |             |             |             |
| H          | -5.23623800 | 0.01048500  | -2.00585900 | <b>Int6</b> |             |             |             |
| H          | -3.00289200 | 0.89712100  | -2.59577600 | C           | 2.67964800  | 0.68969500  | 0.23782400  |

|   |             |             |             |            |             |             |             |
|---|-------------|-------------|-------------|------------|-------------|-------------|-------------|
| C | 2.72959100  | -0.67328600 | -0.05322800 | C          | -2.26425900 | -0.38301800 | 1.20415500  |
| C | 3.95029400  | -1.36731000 | -0.04185300 | C          | -4.46022200 | -1.49272300 | -0.10597700 |
| C | 5.11941700  | -0.69354400 | 0.26233300  | H          | -3.01599700 | -2.29348100 | -1.49763200 |
| C | 5.07391200  | 0.67385600  | 0.56134600  | C          | -3.54805400 | -0.19423900 | 1.69973700  |
| C | 3.86647300  | 1.35804500  | 0.55075200  | H          | -1.42080600 | 0.05082200  | 1.73487700  |
| C | 1.37827600  | 1.42312200  | 0.20948500  | C          | -4.65802000 | -0.73663600 | 1.04703500  |
| C | 0.20927300  | 0.62187500  | -0.26554400 | H          | -5.30952500 | -1.92725300 | -0.62547900 |
| C | 1.51569700  | -1.44957600 | -0.33728200 | H          | -3.68298500 | 0.38403900  | 2.60951600  |
| H | 3.95776800  | -2.42773800 | -0.26982100 | H          | -5.65798800 | -0.57309300 | 1.43582300  |
| H | 6.06637700  | -1.22272000 | 0.27123800  |            |             |             |             |
| H | 5.98997400  | 1.20505200  | 0.80078500  | <b>TS6</b> |             |             |             |
| H | 3.83331300  | 2.41969700  | 0.77884700  | C          | 2.24931100  | -1.13256400 | -0.56624800 |
| H | 1.47697300  | 2.31165000  | -0.42443800 | C          | 1.30716300  | -1.44407900 | 0.40646600  |
| O | 1.48424700  | -2.62390300 | -0.56165900 | C          | 1.23555500  | -2.70533200 | 0.99127400  |
| C | -0.98506900 | 1.36810600  | -0.72893500 | C          | 2.12598900  | -3.68438700 | 0.55787500  |
| O | -1.11568300 | 2.51710200  | -0.05802800 | C          | 3.06251800  | -3.38965900 | -0.43630600 |
| O | -1.71081100 | 1.02685800  | -1.63498900 | C          | 3.12922300  | -2.11666400 | -1.00402100 |
| C | -2.20626300 | 3.34513200  | -0.47763200 | C          | 2.22655500  | 0.30968000  | -1.00951100 |
| H | -2.17324100 | 4.22504800  | 0.16278900  | C          | 1.03931100  | 0.99511600  | -0.37016300 |
| H | -2.08765900 | 3.63285000  | -1.52434100 | C          | 0.39074600  | -0.34025200 | 0.77849000  |
| H | -3.15205600 | 2.81378500  | -0.34830200 | H          | 0.49381900  | -2.91154100 | 1.75712800  |
| H | 1.15544300  | 1.80990300  | 1.21593400  | H          | 2.08950600  | -4.67927700 | 0.98985400  |
| N | -0.81003700 | -1.52380000 | -0.46187900 | H          | 3.75374200  | -4.15905900 | -0.76644800 |
| N | 0.20430000  | -0.70815300 | -0.31832900 | H          | 3.87001700  | -1.89051000 | -1.76563900 |
| C | -2.05750400 | -1.14730900 | 0.03702000  | H          | 2.16909700  | 0.38473000  | -2.10196700 |
| C | -3.17676600 | -1.69974600 | -0.60272400 | O          | -0.27110300 | -0.19201600 | 1.77498900  |

|           |             |             |             |   |             |             |             |
|-----------|-------------|-------------|-------------|---|-------------|-------------|-------------|
| C         | 1.08648200  | 2.40544600  | 0.09143200  | C | -4.83214800 | -1.51258000 | 0.72337300  |
| O         | 2.31334000  | 2.92537900  | -0.05769600 | C | -4.67366500 | -1.88064300 | -0.62060500 |
| O         | 0.17131700  | 2.99230700  | 0.62232800  | C | -3.50500000 | -1.58931500 | -1.32207900 |
| C         | 2.48216600  | 4.24128900  | 0.47914600  | C | -1.12077500 | -0.53210900 | -1.19002600 |
| H         | 3.51686700  | 4.51275300  | 0.27553900  | C | -0.52492800 | 0.37056500  | -0.08953200 |
| H         | 1.80193500  | 4.94227100  | -0.00943000 | C | -1.46053200 | 0.17598800  | 1.14763200  |
| H         | 2.29352200  | 4.24055600  | 1.55502900  | H | -3.91600300 | -0.53475400 | 2.42424900  |
| H         | 3.14070700  | 0.81848400  | -0.69599600 | H | -5.75534600 | -1.75281900 | 1.24078000  |
| N         | -1.27533300 | 1.00627500  | -0.71842000 | H | -5.48046000 | -2.40411400 | -1.12500600 |
| N         | -0.19318900 | 0.37690300  | -0.56533500 | H | -3.39654100 | -1.88393600 | -2.36173300 |
| C         | -2.44083100 | 0.26787000  | -0.45677900 | H | -1.17810100 | -0.03407800 | -2.16044500 |
| C         | -3.63305900 | 0.99856400  | -0.56042600 | O | -1.21712300 | 0.58617500  | 2.25679100  |
| C         | -2.48120800 | -1.09412500 | -0.11241800 | C | -0.70225800 | 1.84377100  | -0.47388400 |
| C         | -4.85358400 | 0.38291900  | -0.31775100 | O | 0.37884300  | 2.57743400  | -0.24621800 |
| H         | -3.57294600 | 2.04895600  | -0.82820200 | O | -1.74161100 | 2.26837100  | -0.91889100 |
| C         | -3.70871600 | -1.70139000 | 0.12235100  | C | 0.24896600  | 3.97033500  | -0.57090700 |
| H         | -1.57128800 | -1.68214300 | -0.06232200 | H | 1.20659900  | 4.42080700  | -0.31646900 |
| C         | -4.89307100 | -0.96873700 | 0.02683200  | H | 0.03977600  | 4.09076000  | -1.63568600 |
| H         | -5.77318400 | 0.95367300  | -0.39717600 | H | -0.55366700 | 4.42117900  | 0.01573000  |
| H         | -3.74220000 | -2.75494000 | 0.38138300  | H | -0.49053100 | -1.41829000 | -1.30865700 |
| H         | -5.84567000 | -1.45373000 | 0.21611500  | N | 0.85784700  | 0.12649700  | 0.33618100  |
| <b>5a</b> |             |             |             | N | 1.54896200  | -0.40344000 | -0.54300800 |
| C         | -2.48199800 | -0.91544200 | -0.66004500 | C | 2.91120200  | -0.63413200 | -0.17553400 |
| C         | -2.65174000 | -0.54684500 | 0.67339300  | C | 3.65209700  | -1.39006600 | -1.08272800 |
| C         | -3.81525100 | -0.83810100 | 1.38631500  | C | 3.50222300  | -0.14045600 | 0.99219900  |
|           |             |             |             | C | 4.98980500  | -1.67330300 | -0.81857000 |

|            |             |             |             |   |             |             |             |
|------------|-------------|-------------|-------------|---|-------------|-------------|-------------|
| H          | 3.16424600  | -1.75040000 | -1.98343500 | O | 2.67926000  | -1.36662600 | 1.87158700  |
| C          | 4.83826600  | -0.42156700 | 1.24639200  | C | 4.53641400  | -1.67523600 | 0.06169000  |
| H          | 2.91331700  | 0.45685600  | 1.67957900  | H | 5.09870700  | -1.76522800 | -0.86838200 |
| C          | 5.58218100  | -1.18914100 | 0.34545400  | H | 4.86852400  | -0.79886100 | 0.62274400  |
| H          | 5.56711500  | -2.26624300 | -1.52067700 | H | 4.67982900  | -2.57244500 | 0.67038200  |
| H          | 5.30640000  | -0.03986700 | 2.14837400  | H | 1.08731800  | -2.28832900 | -1.49254300 |
| H          | 6.62599300  | -1.40409100 | 0.55263300  | N | -0.24908100 | 1.31015500  | -0.67089300 |
|            |             |             |             | N | 0.70692400  | 0.99483400  | 0.18593200  |
| <b>TS7</b> |             |             |             | S | 2.19180700  | 1.56853900  | -0.47912400 |
| C          | -0.92262400 | -1.63379700 | -1.05270900 | C | -1.49320400 | 1.43463900  | -0.05138400 |
| C          | -1.31839000 | -1.64056100 | 0.28305100  | C | -2.61457200 | 1.54442800  | -0.89722000 |
| C          | -2.64664400 | -1.84886000 | 0.65741200  | C | -1.70798600 | 1.45913300  | 1.34163300  |
| C          | -3.59099500 | -2.03371800 | -0.34442200 | C | -3.89801800 | 1.64156200  | -0.37518400 |
| C          | -3.20182100 | -2.01410800 | -1.69372900 | H | -2.44879300 | 1.52793300  | -1.97140000 |
| C          | -1.87065100 | -1.82158500 | -2.05788400 | C | -2.99608100 | 1.55978300  | 1.85454800  |
| C          | 0.55880600  | -1.38268200 | -1.17336500 | H | -0.85732500 | 1.36792000  | 2.00735300  |
| C          | 0.96666200  | -0.98084400 | 0.23108400  | C | -4.10288100 | 1.64163100  | 1.00687700  |
| C          | -0.15881300 | -1.31023600 | 1.15525900  | H | -4.74686200 | 1.70888800  | -1.05056800 |
| H          | -2.92644400 | -1.83683800 | 1.70758500  | H | -3.13994100 | 1.56742000  | 2.93212000  |
| H          | -4.63647200 | -2.18171400 | -0.09039800 | H | -5.10651700 | 1.70943300  | 1.41513100  |
| H          | -3.95396500 | -2.15130600 | -2.46559300 | O | 2.39782600  | 1.20134500  | -1.88081700 |
| H          | -1.58270800 | -1.80768000 | -3.10593800 | O | 3.24868700  | 1.26099600  | 0.48386000  |
| H          | 0.76982800  | -0.59563800 | -1.90457500 | C | 1.87903800  | 3.32162800  | -0.40334000 |
| O          | -0.16869100 | -1.30680400 | 2.37673700  | H | 1.60469100  | 3.58797600  | 0.61865800  |
| C          | 2.32781200  | -1.29174500 | 0.71410400  |   |             |             |             |
| O          | 3.17394300  | -1.52687900 | -0.31564000 |   |             |             |             |

**Int7**

|   |             |             |             |            |             |             |             |
|---|-------------|-------------|-------------|------------|-------------|-------------|-------------|
| C | -2.41797600 | 0.89219100  | -0.86916900 | C          | 2.16989500  | 1.10391500  | -0.19986900 |
| C | -1.95151300 | 1.52350700  | 0.28133100  | C          | 2.71372100  | 2.31722700  | -0.71993200 |
| C | -2.46826100 | 2.74057800  | 0.72558200  | C          | 2.82099400  | 0.58067600  | 0.95464300  |
| C | -3.48114100 | 3.33109400  | -0.01980500 | C          | 3.80957400  | 2.93809600  | -0.14487800 |
| C | -3.96096100 | 2.70187500  | -1.17726200 | H          | 2.23676300  | 2.74595400  | -1.59859800 |
| C | -3.43941100 | 1.48364100  | -1.60957200 | C          | 3.92307200  | 1.21734100  | 1.51579800  |
| C | -1.67613900 | -0.39105900 | -1.15238400 | H          | 2.42344700  | -0.31886700 | 1.41072500  |
| C | -0.73166400 | -0.59805800 | 0.06005800  | C          | 4.44230100  | 2.39856600  | 0.98295700  |
| C | -0.91307900 | 0.69810700  | 0.92699500  | H          | 4.18410700  | 3.86018500  | -0.58510400 |
| H | -2.08461200 | 3.20420400  | 1.62974100  | H          | 4.38403400  | 0.77936400  | 2.39955300  |
| H | -3.90766700 | 4.27896200  | 0.29276800  | H          | 5.30521300  | 2.88402800  | 1.42754200  |
| H | -4.75539900 | 3.17439400  | -1.74756200 | O          | 1.81276200  | -1.62720400 | -2.41042000 |
| H | -3.82125700 | 1.00866400  | -2.50891400 | O          | -0.05383100 | -2.89962000 | -1.30771000 |
| H | -1.06755000 | -0.27674600 | -2.05515800 | C          | 2.30814000  | -2.83402000 | -0.13918500 |
| O | -0.34806400 | 0.90336100  | 1.97473300  | H          | 1.82198700  | -3.05010800 | 0.81224100  |
| C | -1.13760200 | -1.73606700 | 0.99033700  | H          | 2.61973500  | -3.75302900 | -0.64217800 |
| O | -2.46880700 | -1.80015200 | 1.09772700  | H          | 3.15932500  | -2.16408500 | -0.00449000 |
| O | -0.38086700 | -2.42806300 | 1.62599400  |            |             |             |             |
| C | -2.96357800 | -2.77188100 | 2.02533100  | <b>TS8</b> |             |             |             |
| H | -4.04818200 | -2.67664900 | 2.00580100  | C          | -2.36563800 | -1.03593200 | 0.86766400  |
| H | -2.66530400 | -3.77627300 | 1.71702100  | C          | -2.29311100 | -1.44488200 | -0.46162300 |
| H | -2.58207800 | -2.56932900 | 3.02843800  | C          | -3.02292700 | -2.52855800 | -0.95182300 |
| H | -2.35112800 | -1.23522400 | -1.30444800 | C          | -3.84470400 | -3.21455600 | -0.06723600 |
| N | 1.09045400  | 0.58883200  | -0.84228200 | C          | -3.92609800 | -2.81117700 | 1.27371700  |
| N | 0.68654800  | -0.65328200 | -0.26031900 | C          | -3.19439600 | -1.72559600 | 1.75109500  |
| S | 1.12136100  | -2.02657700 | -1.18672700 | C          | -1.47970700 | 0.15275400  | 1.14738800  |

|   |             |             |             |           |             |             |             |
|---|-------------|-------------|-------------|-----------|-------------|-------------|-------------|
| C | -0.81133900 | 0.49563200  | -0.20562400 | C         | 4.87692400  | -2.17328200 | -0.67955200 |
| C | -1.38075600 | -0.56227900 | -1.21103100 | H         | 4.34452300  | -3.85544000 | 0.56214000  |
| H | -2.94467800 | -2.81768400 | -1.99590400 | H         | 5.07368100  | -0.38179900 | -1.85678100 |
| H | -4.42842500 | -4.06319700 | -0.40938400 | H         | 5.87612400  | -2.53543700 | -0.90048100 |
| H | -4.57441100 | -3.35728600 | 1.95282000  | O         | 2.05526300  | 1.13364200  | 2.12627500  |
| H | -3.26924700 | -1.42567500 | 2.79250900  | O         | 0.12824800  | 2.69420500  | 1.61067800  |
| H | -0.70072300 | -0.11475000 | 1.86830200  | C         | 2.32400900  | 2.90379800  | 0.18220300  |
| O | -1.11976800 | -0.59510300 | -2.39059200 | H         | 1.78222800  | 3.24903700  | -0.69911100 |
| C | -1.19699600 | 1.85037500  | -0.78160600 | H         | 2.58938700  | 3.74453900  | 0.82954800  |
| O | -2.50058000 | 2.08620600  | -0.59792800 | H         | 3.21516100  | 2.34169000  | -0.10121600 |
| O | -0.46538900 | 2.57903200  | -1.40515000 |           |             |             |             |
| C | -2.98693200 | 3.30772700  | -1.16243700 | <b>2a</b> |             |             |             |
| H | -4.05057400 | 3.33953700  | -0.93071500 | C         | 1.12446600  | 1.21938300  | -0.00000700 |
| H | -2.47488900 | 4.16196000  | -0.71433200 | C         | -0.26848900 | 1.19793500  | -0.00000600 |
| H | -2.83443900 | 3.31618400  | -2.24387500 | C         | -0.93840500 | -0.02660600 | -0.00000500 |
| H | -2.04207200 | 0.99718000  | 1.54913600  | C         | -0.21727000 | -1.22261500 | 0.00001000  |
| N | 0.97814800  | -0.84472800 | 0.24444400  | C         | 1.17321500  | -1.18664200 | -0.00001500 |
| N | 0.64896000  | 0.34297500  | -0.25757500 | C         | 1.85331600  | 0.03174600  | 0.00000400  |
| S | 1.22858000  | 1.82219200  | 1.10728800  | H         | 1.63995200  | 2.17538300  | -0.00001800 |
| C | 2.26646300  | -1.21788800 | -0.09454200 | H         | -0.84070700 | 2.12225400  | 0.00001900  |
| C | 2.74113900  | -2.44181100 | 0.42931900  | H         | -0.75884600 | -2.16365300 | 0.00003300  |
| C | 3.14495000  | -0.48943700 | -0.92986700 | H         | 1.72871500  | -2.11999100 | 0.00003400  |
| C | 4.01532100  | -2.90871000 | 0.14093100  | H         | 2.93837000  | 0.05419400  | 0.00005400  |
| H | 2.07407200  | -3.01125100 | 1.07167300  | O         | -2.29817700 | -0.11552400 | -0.00002800 |
| C | 4.42295100  | -0.96505500 | -1.20920700 | H         | -2.68305900 | 0.77680000  | 0.00021500  |
| H | 2.80014000  | 0.43899600  | -1.37189900 |           |             |             |             |



|                                          |             |             |             |             |             |             |             |
|------------------------------------------|-------------|-------------|-------------|-------------|-------------|-------------|-------------|
| CO <sub>3</sub> <sup>2-</sup>            |             |             |             | H           | -2.59269300 | 2.48021300  | 0.40797100  |
| C                                        | 0.00000000  | 0.00131700  | 0.00000000  | H           | -4.18080800 | 1.11898800  | -0.92914200 |
| O                                        | -0.72423900 | -1.07191600 | 0.00000000  | O           | 0.83407400  | 0.41716600  | -1.34517200 |
| O                                        | -0.56667200 | 1.16410200  | 0.00000000  | O           | 2.96262000  | -0.79899400 | -0.79160300 |
| O                                        | 1.29091100  | -0.09317300 | 0.00000000  | C           | 2.46450300  | 1.46263900  | 0.49025400  |
|                                          |             |             |             | H           | 3.08499400  | 1.12439000  | 1.32258800  |
| HCO <sub>3</sub> <sup>-</sup> in ethanol |             |             |             | H           | 3.06914900  | 2.01916600  | -0.23192400 |
| C                                        | 0.00000000  | 0.14312800  | 0.00000000  | H           | 1.62551100  | 2.06829100  | 0.83698600  |
| O                                        | 1.20528800  | 0.47295000  | 0.00000000  |             |             |             |             |
| O                                        | -1.02081400 | 0.85587500  | 0.00000000  | <b>Int8</b> |             |             |             |
| O                                        | -0.26022800 | -1.22791000 | 0.00000000  | C           | -1.09929200 | 1.19845700  | 0.00005200  |
| H                                        | 0.60603600  | -1.66608700 | 0.00000000  | C           | 0.28902400  | 1.20605600  | 0.00002700  |
|                                          |             |             |             | C           | 1.06455400  | 0.00001600  | -0.00024400 |
| <b>1a</b> in ethanol                     |             |             |             | C           | 0.28902000  | -1.20605100 | 0.00002600  |
| N                                        | 0.04262000  | -1.17378700 | 1.25916200  | C           | -1.09927800 | -1.19847200 | 0.00005600  |
| N                                        | 1.22580200  | -0.97482900 | 1.05537500  | C           | -1.82088500 | 0.00000000  | -0.00006000 |
| S                                        | 1.84308600  | 0.03570500  | -0.35819400 | H           | -1.63395200 | 2.14717500  | 0.00009100  |
| C                                        | -1.05329300 | -0.52264100 | 0.59792700  | H           | 0.83155900  | 2.14997400  | 0.00011100  |
| C                                        | -1.95935500 | -1.31567000 | -0.10095200 | H           | 0.83160700  | -2.14993900 | 0.00010700  |
| C                                        | -1.27259400 | 0.83777000  | 0.80500100  | H           | -1.63395100 | -2.14718200 | 0.00008500  |
| C                                        | -3.07364100 | -0.70931500 | -0.67178400 | H           | -2.90655400 | -0.00001500 | -0.00010100 |
| H                                        | -1.77574500 | -2.37975600 | -0.20987800 | O           | 2.34655400  | -0.00000600 | 0.00007100  |
| C                                        | -2.40826300 | 1.42201400  | 0.25244900  |             |             |             |             |
| H                                        | -0.57925200 | 1.41933200  | 1.40511400  | <b>Int9</b> |             |             |             |
| C                                        | -3.30061300 | 0.65555800  | -0.49512700 | C           | 2.37687100  | 0.34035900  | -0.62455700 |
| H                                        | -3.77350700 | -1.30909700 | -1.24478500 | C           | 3.18161900  | -0.69475500 | -0.88699300 |

|   |             |             |             |             |             |             |             |
|---|-------------|-------------|-------------|-------------|-------------|-------------|-------------|
| C | 3.18801200  | -1.89748300 | -0.03506600 | H           | -2.19811500 | 2.32270800  | 1.02781500  |
| C | 2.22964700  | -1.93102700 | 1.08598200  | H           | -2.03926200 | 3.68342700  | -0.13367300 |
| C | 1.43751600  | -0.88876700 | 1.35644900  | H           | -2.28412800 | 2.01537900  | -0.74468800 |
| C | 1.48442600  | 0.39601100  | 0.58511900  | H           | 1.88880300  | 1.16327700  | 1.26541300  |
| H | 2.36872700  | 1.21325000  | -1.27345000 |             |             |             |             |
| H | 3.84933500  | -0.70449200 | -1.74389300 | <b>TS10</b> |             |             |             |
| H | 2.20012400  | -2.84393500 | 1.67384700  | C           | -2.24512400 | 0.35418200  | 0.77719400  |
| H | 0.72961400  | -0.92201100 | 2.18099000  | C           | -3.28099400 | -0.44698900 | 1.05000500  |
| O | 3.94668100  | -2.83786800 | -0.25650100 | C           | -3.76048400 | -1.44061800 | 0.07299000  |
| N | -0.44923400 | 0.02666100  | -0.81178300 | C           | -3.00716600 | -1.55633800 | -1.19019700 |
| N | 0.09836800  | 0.79029300  | 0.26593500  | C           | -1.98369600 | -0.74152900 | -1.46606200 |
| S | -0.07804700 | 2.43355200  | -0.01368500 | C           | -1.56418000 | 0.37907100  | -0.56183500 |
| C | -1.52819300 | -0.69578500 | -0.40109800 | H           | -1.87948100 | 1.06025900  | 1.51951900  |
| C | -2.15961000 | -1.51717800 | -1.38193200 | H           | -3.79625400 | -0.41981900 | 2.00608400  |
| C | -2.11003200 | -0.72878200 | 0.89802600  | H           | -3.31887400 | -2.34162300 | -1.87285400 |
| C | -3.26121300 | -2.30137800 | -1.08666400 | H           | -1.42307900 | -0.83804700 | -2.39318600 |
| H | -1.74143500 | -1.51188600 | -2.38598200 | O           | -4.72900100 | -2.15949300 | 0.30778100  |
| C | -3.21806900 | -1.52428700 | 1.17613400  | N           | 0.32197300  | -0.49553200 | 0.42920800  |
| H | -1.67819900 | -0.11834100 | 1.68426600  | N           | -0.08640600 | 0.36519300  | -0.50246000 |
| C | -3.81459700 | -2.32260200 | 0.20051100  | S           | 0.28797400  | 2.28296500  | 0.09979700  |
| H | -3.70121200 | -2.90953900 | -1.87450200 | C           | 1.60735500  | -0.97191900 | 0.19970300  |
| H | -3.62459200 | -1.51548100 | 2.18592900  | C           | 2.18264000  | -1.75794800 | 1.22166500  |
| H | -4.67900400 | -2.93780800 | 0.42910300  | C           | 2.37085800  | -0.77961100 | -0.97443400 |
| O | 0.37493500  | 2.85723100  | -1.34823800 | C           | 3.44420300  | -2.32053300 | 1.08163800  |
| O | 0.52979700  | 3.13844100  | 1.12642200  | H           | 1.60366200  | -1.91284200 | 2.12851500  |
| C | -1.83923600 | 2.62359200  | 0.04329700  | C           | 3.63574900  | -1.34403400 | -1.10363400 |

|   |             |             |             |   |             |             |             |
|---|-------------|-------------|-------------|---|-------------|-------------|-------------|
| H | 1.95165600  | -0.19191500 | -1.78430700 | N | -0.64963900 | 2.52400000  | 0.00014600  |
| C | 4.18940900  | -2.11797800 | -0.08274600 | C | -1.61204100 | 0.34021200  | -0.00004500 |
| H | 3.85334000  | -2.92059100 | 1.89064400  | C | -1.31571300 | -1.02074900 | -0.00046600 |
| H | 4.19620100  | -1.17990400 | -2.02109300 | C | -2.92314900 | 0.81319800  | 0.00028900  |
| H | 5.17733000  | -2.55457500 | -0.19184300 | C | -2.36951300 | -1.93130300 | -0.00055200 |
| O | 0.18452300  | 2.45688200  | 1.57825300  | H | -0.28749500 | -1.36832900 | -0.00074600 |
| O | -0.40771300 | 3.30309900  | -0.73910300 | C | -3.96121600 | -0.10881800 | 0.00019600  |
| C | 2.03456100  | 2.43436700  | -0.26918800 | H | -3.11113600 | 1.88127700  | 0.00063600  |
| H | 2.18730000  | 2.27513100  | -1.33758400 | C | -3.68623600 | -1.47822100 | -0.00021700 |
| H | 2.33341200  | 3.44790500  | 0.01458300  | H | -2.15566300 | -2.99487800 | -0.00087200 |
| H | 2.58631900  | 1.69766300  | 0.31630400  | H | -4.98820900 | 0.24115700  | 0.00045800  |
| H | -1.84935400 | 1.31865200  | -1.06480300 | H | -4.50331900 | -2.19276200 | -0.00026800 |
|   |             |             |             | H | 0.78172300  | 2.33900200  | 0.00043000  |

### TS10b

|   |             |             |             |
|---|-------------|-------------|-------------|
| C | 1.44598300  | 0.42602900  | -1.24154400 |
| C | 2.63522300  | -0.22008900 | -1.24422900 |
| C | 3.32320900  | -0.56685800 | 0.00002500  |
| C | 2.63476600  | -0.22115900 | 1.24432600  |
| C | 1.44553000  | 0.42496300  | 1.24176800  |
| C | 0.89640300  | 0.92467700  | 0.00023000  |
| H | 0.92091300  | 0.65060100  | -2.16745100 |
| H | 3.11336500  | -0.51823800 | -2.17252300 |
| H | 3.11255600  | -0.52013200 | 2.17253600  |
| H | 0.92011900  | 0.64870200  | 2.16768300  |
| O | 4.42058200  | -1.14587900 | -0.00001800 |
| N | -0.52850200 | 1.29161800  | 0.00008000  |

### Int10

|   |            |             |             |
|---|------------|-------------|-------------|
| C | 2.06519700 | 0.27878600  | -0.55602300 |
| C | 3.21202600 | -0.18156300 | -1.06782500 |
| C | 4.06350900 | -1.13228800 | -0.32902100 |
| C | 3.59063200 | -1.56842500 | 0.99961100  |
| C | 2.45452100 | -1.09831400 | 1.52272600  |
| C | 1.60358500 | -0.08069500 | 0.82197200  |
| H | 1.44735000 | 0.98938500  | -1.10187600 |
| H | 3.56590600 | 0.12092800  | -2.04944300 |
| H | 4.20870200 | -2.29197500 | 1.52324000  |
| H | 2.10313100 | -1.43123000 | 2.49624300  |
| O | 5.11727100 | -1.55121700 | -0.79966900 |

|             |             |             |             |   |             |             |             |
|-------------|-------------|-------------|-------------|---|-------------|-------------|-------------|
| N           | -0.31102800 | -0.82252700 | -0.16021600 | C | -3.35057900 | -1.42639500 | -1.22121400 |
| N           | 0.20397000  | -0.54455900 | 0.93022300  | C | -2.07323800 | -1.04135800 | -1.40871600 |
| S           | -0.44946600 | 2.69158500  | 0.15062400  | C | -1.24435500 | -0.52816000 | -0.31321800 |
| C           | -1.66672400 | -1.27793000 | -0.07680600 | H | -1.14811200 | -0.44384900 | 1.87320800  |
| C           | -2.18303500 | -1.83637500 | -1.24475400 | H | -3.49119100 | -1.16553400 | 2.23231000  |
| C           | -2.46330800 | -1.15189200 | 1.06547300  | H | -3.97824600 | -1.74586800 | -2.04802800 |
| C           | -3.49725400 | -2.29735700 | -1.26977400 | H | -1.62754400 | -1.04132700 | -2.40117300 |
| H           | -1.54324200 | -1.90431400 | -2.11968900 | O | -5.11996500 | -1.79961700 | 0.30287000  |
| C           | -3.77653400 | -1.60411900 | 1.03035100  | N | 0.87647000  | -0.80438600 | 0.44725900  |
| H           | -2.05158500 | -0.69379500 | 1.95839300  | N | 0.16207300  | -0.70650100 | -0.56534000 |
| C           | -4.29368800 | -2.18069700 | -0.13294300 | S | -0.56212400 | 2.97020600  | 0.19576600  |
| H           | -3.89922400 | -2.73880000 | -2.17625400 | C | 2.27843100  | -0.89296100 | 0.17665300  |
| H           | -4.40374100 | -1.50337500 | 1.91082100  | C | 3.08977500  | -1.09282300 | 1.29330600  |
| H           | -5.32144100 | -2.53016000 | -0.15205600 | C | 2.84922700  | -0.78368500 | -1.09672700 |
| O           | 0.36750000  | 3.09231200  | -1.08207500 | C | 4.47120000  | -1.19143900 | 1.14528800  |
| O           | -0.95124300 | 3.91796700  | 0.90828900  | H | 2.62033000  | -1.16803800 | 2.26968300  |
| C           | -1.97869100 | 2.11755600  | -0.64645600 | C | 4.22800000  | -0.88084500 | -1.23815600 |
| H           | -2.70836800 | 1.80752700  | 0.10759800  | H | 2.21068000  | -0.62570700 | -1.95922100 |
| H           | -2.37057100 | 2.96483200  | -1.21971700 | C | 5.04201100  | -1.08525900 | -0.12075400 |
| H           | -1.75938200 | 1.28403900  | -1.31966400 | H | 5.09876100  | -1.34893900 | 2.01700700  |
| H           | 1.62369300  | 0.83857500  | 1.43081600  | H | 4.67420300  | -0.79483300 | -2.22441100 |
|             |             |             |             | H | 6.11866600  | -1.15800500 | -0.24077000 |
| <b>TS11</b> |             |             |             | O | -1.61330500 | 2.14264400  | -0.60640900 |
| C           | -1.78912000 | -0.71034600 | 1.03868400  | O | -0.17401800 | 2.22625300  | 1.46169200  |
| C           | -3.06408100 | -1.09732400 | 1.23548800  | C | 0.89522500  | 2.73453900  | -0.85213100 |
| C           | -3.94378800 | -1.46219400 | 0.11813600  | H | 1.75284400  | 3.23449600  | -0.39396800 |

|   |             |            |             |   |            |             |             |
|---|-------------|------------|-------------|---|------------|-------------|-------------|
| H | 1.08465200  | 1.65835900 | -0.92149000 | N | 0.08564900 | 0.51232300  | -0.00028900 |
| H | 0.70647000  | 3.15116200 | -1.84494000 | C | 2.22299400 | -0.19407800 | -0.00010900 |
| H | -1.37129000 | 0.69626100 | -0.46895400 | C | 3.06849500 | -1.30477200 | -0.00001100 |

**MeSO<sub>2</sub><sup>-</sup> in Ethanol**

|   |             |             |             |   |             |             |             |
|---|-------------|-------------|-------------|---|-------------|-------------|-------------|
| S | -0.21068800 | 0.00000600  | -0.39677900 | C | 2.75999700  | 1.09957300  | -0.00001000 |
| O | -0.71396900 | -1.26334800 | 0.30102200  | C | 4.44995600  | -1.13103000 | 0.00019200  |
| O | -0.71364400 | 1.26352400  | 0.30100000  | H | 2.62500400  | -2.29600300 | -0.00007300 |
| C | 1.53108500  | -0.00014400 | 0.13099700  | C | 4.13846800  | 1.26613200  | 0.00019400  |
| H | 2.03831800  | 0.89493600  | -0.24022300 | H | 2.09427300  | 1.95555200  | -0.00008200 |
| H | 1.52920000  | -0.00000300 | 1.22652500  | C | 4.98624500  | 0.15458100  | 0.00030000  |
| H | 2.03787900  | -0.89558100 | -0.23999400 | H | 5.10481800  | -1.99676700 | 0.00028200  |
|   |             |             |             | H | 4.55862600  | 2.26733900  | 0.00028300  |
|   |             |             |             | H | 6.06282800  | 0.29506900  | 0.00046800  |
|   |             |             |             | H | -5.68831500 | -1.11964400 | 0.00085500  |

**3a**

|   |             |             |             |
|---|-------------|-------------|-------------|
| C | -1.85969100 | -1.05247600 | -0.00033700 |
| C | -3.23505400 | -1.21207700 | -0.00011900 |
| C | -4.07044500 | -0.08585600 | 0.00017700  |
| C | -3.52132200 | 1.19930600  | 0.00000500  |
| C | -2.14318200 | 1.35040400  | -0.00024100 |
| C | -1.30226100 | 0.23343100  | -0.00033900 |
| H | -1.20782900 | -1.91928800 | -0.00048100 |
| H | -3.67616500 | -2.20534100 | -0.00009300 |
| H | -4.18421800 | 2.05835300  | 0.00013700  |
| H | -1.69470000 | 2.33934800  | -0.00030600 |
| O | -5.42130800 | -0.18482000 | 0.00055700  |
| N | 0.83020100  | -0.48930600 | -0.00023300 |

**TS12**

|   |             |             |             |
|---|-------------|-------------|-------------|
| C | 0.40234800  | -2.22516800 | 0.12307600  |
| C | -0.53701600 | -2.39614000 | -0.83566000 |
| C | -1.91669200 | -1.95749600 | -0.62025100 |
| C | -2.24521500 | -1.50096500 | 0.73642300  |
| C | -1.28521800 | -1.33734600 | 1.67365200  |
| C | 0.10315700  | -1.44938200 | 1.30515100  |
| H | 1.42632400  | -2.54948000 | -0.04418100 |
| H | -0.31527100 | -2.87952700 | -1.78369100 |
| H | -3.29501300 | -1.31389900 | 0.94693900  |
| H | -1.53747700 | -0.98102100 | 2.66845500  |
| O | -2.78098100 | -2.03839300 | -1.50829400 |

|              |             |             |             |   |             |             |             |
|--------------|-------------|-------------|-------------|---|-------------|-------------|-------------|
| N            | 0.42040900  | 0.32471000  | 0.60113300  | C | -3.19493800 | -0.56781400 | 0.91246200  |
| N            | -0.41257800 | 0.53629300  | -0.41489700 | C | -1.91995700 | -0.40012700 | 1.28164900  |
| S            | -1.65345300 | 1.54239200  | 0.00449200  | C | -0.77420000 | -1.05774600 | 0.57677400  |
| C            | 1.78537900  | 0.23359300  | 0.17747200  | H | -0.35925900 | -2.16883000 | -1.28772700 |
| C            | 2.76409900  | 0.14681000  | 1.17604000  | H | -2.71927400 | -2.46490500 | -1.97086400 |
| C            | 2.17796400  | 0.29033100  | -1.16375300 | H | -4.01756600 | -0.11435500 | 1.45811500  |
| C            | 4.11100400  | 0.09503500  | 0.83687600  | H | -1.65940400 | 0.20379000  | 2.14570700  |
| H            | 2.45700200  | 0.13451800  | 2.21807300  | O | -4.72797700 | -1.54374200 | -0.59487400 |
| C            | 3.53052700  | 0.24042600  | -1.49505200 | N | 0.31716400  | -0.09915200 | 0.34145400  |
| H            | 1.41895100  | 0.37940200  | -1.93224600 | N | -0.08271800 | 0.82909200  | -0.67390100 |
| C            | 4.50302100  | 0.13756800  | -0.50237800 | S | -0.08722000 | 2.31108300  | -0.07931900 |
| H            | 4.85889400  | 0.03182300  | 1.62211200  | C | 1.59443100  | -0.68297100 | 0.13785100  |
| H            | 3.82436500  | 0.28370500  | -2.54016500 | C | 2.10754200  | -1.59333200 | 1.07963000  |
| H            | 5.55548900  | 0.10140400  | -0.76642800 | C | 2.40009700  | -0.33199800 | -0.95438600 |
| O            | -1.91365400 | 1.66099800  | 1.45138500  | C | 3.37277100  | -2.14472000 | 0.91673300  |
| O            | -2.80443700 | 1.21494600  | -0.85485500 | H | 1.52685900  | -1.85050100 | 1.96057800  |
| C            | -1.05945400 | 3.13923200  | -0.52739500 | C | 3.67000900  | -0.88693100 | -1.10369500 |
| H            | -0.82941800 | 3.09198200  | -1.59320700 | H | 2.01513900  | 0.37487600  | -1.67874300 |
| H            | -1.84278200 | 3.87743200  | -0.33783100 | C | 4.16708800  | -1.79942900 | -0.17740700 |
| H            | -0.16175300 | 3.38267900  | 0.04524500  | H | 3.74496900  | -2.84232000 | 1.66189100  |
| H            | 0.83027500  | -1.46371600 | 2.11029900  | H | 4.27228000  | -0.60140500 | -1.96206000 |
|              |             |             |             | H | 5.15689500  | -2.22844000 | -0.29798000 |
| <b>Int12</b> |             |             |             | O | -0.81406000 | 2.49198300  | 1.20301800  |
| C            | -1.17417700 | -1.76621800 | -0.68793500 | O | -0.53660900 | 3.19797300  | -1.17634300 |
| C            | -2.44638700 | -1.92982200 | -1.06540100 | C | 1.59383500  | 2.79351200  | 0.30518900  |
| C            | -3.55487300 | -1.36686500 | -0.27246700 | H | 2.19276300  | 2.75624800  | -0.60661000 |

H 1.58190400 3.80903300 0.70871000

H 1.99900000 2.10472000 1.05074200

H -0.39818500 -1.82776000 1.26609000

### TS13

C -1.85715800 -0.85725800 -0.95386800

C -3.21579900 -0.86157400 -0.93250200

C -3.96848200 -0.15652500 0.09679300

C -3.17907800 0.57564000 1.07873300

C -1.82119100 0.57772100 1.04562400

C -1.09332300 -0.24140000 0.10244900

H -1.30688600 -1.36287700 -1.74308100

H -3.78901600 -1.37964300 -1.69656600

H -3.72419300 1.13200700 1.83624700

H -1.24971400 1.14933800 1.77483600

O -5.21631200 -0.16734500 0.12890700

N 0.33249000 -0.01402600 -0.10693800

N 0.90081200 -0.94525800 0.86101300

S 1.66365200 -2.16667200 0.06205500

C 0.83497800 1.30217400 -0.07019100

C 0.12358500 2.31620300 -0.73218800

C 2.04936700 1.61409500 0.55069000

C 0.62367600 3.61201000 -0.76733200

H -0.81839100 2.07829100 -1.21926300

C 2.54000300 2.91820500 0.50445300

H 2.59372500 0.83810500 1.07620500

C 1.83657400 3.92500100 -0.15114300

H 0.05882400 4.38396000 -1.28217000

H 3.48297700 3.14432400 0.99442200

H 2.22430700 4.93825700 -0.18218400

O 0.83598300 -2.76689900 -1.00163500

O 2.14308900 -3.08615000 1.10625900

C 3.06966000 -1.43768600 -0.74869600

H 3.74598000 -1.03058400 0.00407100

H 3.56453900 -2.22692500 -1.32050100

H 2.71876500 -0.65336700 -1.42308300

H -0.51141300 -1.18563200 0.90449600

### Int13

C -1.84474500 -0.19398500 -1.07853100

C -3.22337700 -0.05679300 -1.08509700

C -3.95522200 0.43106200 0.05010400

C -3.14452900 0.76929100 1.18790500

C -1.76736400 0.63637300 1.18071800

C -1.09738700 0.14293400 0.05301100

H -1.32458600 -0.56565800 -1.95847500

H -3.79289900 -0.32145500 -1.97327800

H -3.65225200 1.15063300 2.07121900

H -1.18752600 0.92013000 2.05911300

O -5.22518400 0.56076600 0.04930100

N 0.33671800 0.01995900 0.05375600

N 0.86572600 -1.01083100 0.84289900

|             |             |             |             |   |             |             |             |
|-------------|-------------|-------------|-------------|---|-------------|-------------|-------------|
| S           | 1.12057000  | -2.44874200 | 0.01047500  | C | 1.18834200  | -0.35342000 | 0.45844200  |
| C           | 1.12847300  | 1.19503200  | 0.03142000  | H | 0.77279100  | -0.82311300 | -1.60752100 |
| C           | 0.60360300  | 2.36370200  | -0.54110300 | H | 3.15068700  | -0.86670000 | -2.26628000 |
| C           | 2.44539700  | 1.20826400  | 0.51100200  | H | 4.28725600  | 0.07600500  | 1.78848700  |
| C           | 1.38185400  | 3.51316300  | -0.62598000 | H | 1.91131600  | 0.10017200  | 2.44380200  |
| H           | -0.41227700 | 2.36710800  | -0.92060500 | O | 5.16304100  | -0.41004800 | -0.64186700 |
| C           | 3.21040300  | 2.36881400  | 0.42064400  | N | -0.18191500 | -0.27335000 | 0.84329500  |
| H           | 2.86448600  | 0.31663600  | 0.96144500  | N | -0.63566700 | 0.67118500  | 1.57348900  |
| C           | 2.69070400  | 3.52957200  | -0.14643400 | S | -1.03431400 | 2.38051500  | -0.13906600 |
| H           | 0.95346000  | 4.40590600  | -1.07273100 | C | -1.13419900 | -1.25193200 | 0.39551800  |
| H           | 4.22697400  | 2.35785400  | 0.80369200  | C | -0.70485300 | -2.54143200 | 0.08138700  |
| H           | 3.29247300  | 4.43026300  | -0.21362500 | C | -2.48577700 | -0.91014900 | 0.33225900  |
| O           | 0.02686700  | -2.78191700 | -0.90102300 | C | -1.64333900 | -3.49126000 | -0.31210500 |
| O           | 1.46587300  | -3.41444500 | 1.05418600  | H | 0.34391800  | -2.80520700 | 0.15564700  |
| C           | 2.53746900  | -2.03654800 | -0.96438500 | C | -3.41029000 | -1.87061000 | -0.06014600 |
| H           | 3.37495300  | -1.82102400 | -0.29983100 | H | -2.80428500 | 0.09277200  | 0.58810600  |
| H           | 2.75519100  | -2.90143100 | -1.59561100 | C | -2.99426800 | -3.16104200 | -0.38725000 |
| H           | 2.29061900  | -1.17208200 | -1.58526700 | H | -1.31099900 | -4.49576200 | -0.55369400 |
| H           | 0.33302000  | -1.19142000 | 1.70039800  | H | -4.46117000 | -1.60497200 | -0.11571700 |
|             |             |             |             | H | -3.72091900 | -3.90542500 | -0.69701200 |
| <b>TS14</b> |             |             |             | O | -1.03842800 | 1.41937100  | -1.29822900 |
| C           | 1.54923700  | -0.64269400 | -0.86895900 | O | -0.14126500 | 3.58107600  | -0.32507100 |
| C           | 2.87532600  | -0.65966700 | -1.23542800 | C | -2.69861700 | 3.08646900  | -0.16073700 |
| C           | 3.94304200  | -0.39186900 | -0.30243500 | H | -2.80102100 | 3.79233100  | 0.66635000  |
| C           | 3.51697100  | -0.10918900 | 1.04472500  | H | -2.81579400 | 3.60522200  | -1.11731300 |
| C           | 2.18852300  | -0.08882600 | 1.40803600  | H | -3.43721800 | 2.28663800  | -0.07136100 |



H 0.15018300 1.26549200 1.85557000

H -4.83829200 -1.69856800 0.09266300

H 0.28059800 2.90622600 -0.02727600

### Int14

C 1.00002100 -0.76405700 -0.50670200

### TS15

C 2.23510500 -1.32982200 -0.60182600

C -1.68003400 0.20193800 1.35714900

C 3.43593200 -0.64758400 -0.14915600

C -2.95897400 -0.20213700 1.18053300

C 3.23138700 0.67736300 0.41949600

C -3.52421400 -0.43354000 -0.15989200

C 1.99862600 1.24791300 0.49513100

C -2.62880200 -0.22885100 -1.29182000

C 0.84860100 0.54626900 0.03310800

C -1.35910400 0.21026900 -1.11271000

H 0.13290800 -1.29310500 -0.88810000

C -0.84909000 0.45391100 0.21374300

H 2.35681300 -2.31644700 -1.03838000

H -1.25993600 0.36326500 2.34562600

H 4.10365000 1.19074200 0.81269700

H -3.61337200 -0.39339700 2.02594000

H 1.88740100 2.21800200 0.97253400

H -3.01419500 -0.45661000 -2.28052900

O 4.56810400 -1.16530900 -0.22877900

H -0.67835900 0.34170900 -1.94902600

N -0.38793000 1.16466000 0.05237600

O -4.69492300 -0.81361200 -0.29656500

N -0.61133900 2.41411800 0.09380000

N 0.45386400 0.94092900 0.37700500

C -1.59155300 0.35036800 0.05179200

N 0.18043700 2.06618600 -0.29690000

C -1.70627800 -0.70429600 0.95192400

C 1.66816400 0.25789300 0.17414900

C -2.61199100 0.69427500 -0.82777700

C 1.71209500 -1.13704800 0.22999800

C -2.88853700 -1.43768900 0.96302700

C 2.82138000 1.01347600 -0.03837400

H -0.89751100 -0.93178000 1.63851200

C 2.93710900 -1.77564600 0.07793900

C -3.78231300 -0.05722500 -0.81208500

H 0.79677100 -1.70464500 0.37072900

H -2.47641700 1.52339500 -1.51407500

C 4.03478100 0.35586400 -0.21430700

C -3.92100600 -1.11852600 0.08184100

H 2.75825400 2.09727300 -0.04880800

H -3.00209400 -2.25641100 1.66568500

C 4.09855600 -1.03547100 -0.15030300

H -4.58497400 0.18703700 -1.49990400

H 2.98154400 -2.85937300 0.11976700

|   |             |             |             |
|---|-------------|-------------|-------------|
| H | 4.93631700  | 0.93547600  | -0.38612900 |
| H | 5.04947400  | -1.54274000 | -0.27779700 |
| H | -0.46841900 | 2.59419000  | 0.29536600  |

### TS16

|   |             |             |             |
|---|-------------|-------------|-------------|
| C | -1.90977300 | -1.77941300 | -0.13514000 |
| C | -3.22287900 | -1.75909300 | -0.38583700 |
| C | -4.03363100 | -0.55306700 | -0.13135600 |
| C | -3.31675200 | 0.64635300  | 0.33643900  |
| C | -1.99565100 | 0.63862800  | 0.54116600  |
| C | -1.16405800 | -0.60042900 | 0.41987100  |
| H | -1.32988000 | -2.67632100 | -0.34139700 |
| H | -3.74503000 | -2.62173100 | -0.78948100 |
| H | -3.91404600 | 1.54088300  | 0.48774100  |
| H | -1.48109300 | 1.53361900  | 0.87662900  |
| O | -5.24746600 | -0.54733400 | -0.31606500 |
| N | 0.04248500  | -0.33394600 | -0.43697600 |
| N | 0.04788400  | 0.61517600  | -1.27297600 |
| S | 0.88783300  | 2.31065600  | 0.01653700  |
| C | 1.20901900  | -1.15173700 | -0.20617100 |
| C | 1.22148000  | -2.22872200 | 0.68707800  |
| C | 2.37307900  | -0.83515500 | -0.91555300 |
| C | 2.38948300  | -2.96993100 | 0.86390400  |
| H | 0.34136000  | -2.51008300 | 1.25315400  |
| C | 3.53100700  | -1.58037700 | -0.72911300 |

|   |             |             |             |
|---|-------------|-------------|-------------|
| H | 2.34158500  | -0.00291600 | -1.60887900 |
| C | 3.54872400  | -2.65332400 | 0.16231500  |
| H | 2.38347500  | -3.80233000 | 1.56140500  |
| H | 4.42670100  | -1.31954800 | -1.28557600 |
| H | 4.45417600  | -3.23430200 | 0.30680800  |
| O | 1.00505000  | 1.61529700  | 1.35678900  |
| O | 0.06697700  | 3.58210800  | 0.09021200  |
| C | 2.57154800  | 2.93126800  | -0.23998200 |
| H | 2.63250000  | 3.45427300  | -1.19750000 |
| H | 2.79702600  | 3.62102800  | 0.57949300  |
| H | 3.26507500  | 2.08671100  | -0.22629100 |
| H | -0.81582900 | -0.83897500 | 1.43574100  |

### Int15

|   |             |             |             |
|---|-------------|-------------|-------------|
| C | 1.70570200  | 1.10422400  | -0.95201100 |
| C | 2.64282500  | 0.15364500  | -1.04236700 |
| C | 2.90885900  | -0.77050700 | 0.07857200  |
| C | 2.05953300  | -0.63670100 | 1.27966300  |
| C | 1.11377100  | 0.30524500  | 1.36560900  |
| C | 0.91836600  | 1.33198200  | 0.29832000  |
| H | 1.50547000  | 1.78729300  | -1.77473300 |
| H | 3.23944600  | 0.01654000  | -1.93933700 |
| H | 2.23461800  | -1.34890100 | 2.08060600  |
| H | 0.48782800  | 0.39214800  | 2.25083900  |
| O | 3.78692000  | -1.62390600 | 0.00875600  |
| N | -0.56163900 | 1.58450300  | -0.04521000 |

|   |             |             |             |   |             |             |             |
|---|-------------|-------------|-------------|---|-------------|-------------|-------------|
| N | -0.96495000 | 2.70188100  | -0.27802400 | N | -0.34245000 | 1.27937200  | -0.59150200 |
| C | -1.44049200 | 0.40139600  | -0.07668100 | N | -0.20263700 | 2.39245200  | 0.12219300  |
| C | -0.99212300 | -0.81843200 | -0.57235000 | C | -1.50316900 | 0.42670900  | -0.31901700 |
| C | -2.74720500 | 0.57098500  | 0.36766800  | C | -1.58989600 | -0.75954900 | -1.04264400 |
| C | -1.88361200 | -1.88915200 | -0.62540400 | C | -2.50972800 | 0.81282500  | 0.55809100  |
| H | 0.02308600  | -0.93624700 | -0.93496700 | C | -2.69811200 | -1.58388100 | -0.87076500 |
| C | -3.62263500 | -0.50839200 | 0.32389000  | H | -0.79016300 | -1.02609600 | -1.72847300 |
| H | -3.05846700 | 1.54247600  | 0.73773000  | C | -3.62088900 | -0.01298800 | 0.71681200  |
| C | -3.19268700 | -1.73875600 | -0.17432600 | H | -2.41437400 | 1.74711000  | 1.10122100  |
| H | -1.54834400 | -2.84161700 | -1.02329000 | C | -3.71542400 | -1.21037200 | 0.00809500  |
| H | -4.64135600 | -0.38901400 | 0.67908200  | H | -2.77072900 | -2.51385800 | -1.42615300 |
| H | -3.87931200 | -2.57866700 | -0.21184500 | H | -4.41535500 | 0.27984300  | 1.39661700  |
| H | 1.20598000  | 2.30933000  | 0.70500700  | H | -4.58359900 | -1.84948200 | 0.13635800  |
|   |             |             |             | H | 0.87159000  | 1.74244600  | 1.18362300  |

## TS17

|   |             |             |             |
|---|-------------|-------------|-------------|
| C | 2.13383600  | 1.29152800  | -0.56300500 |
| C | 3.13392200  | 0.40674100  | -0.61237900 |
| C | 3.07662400  | -0.86421200 | 0.13733400  |
| C | 1.85849400  | -1.12775900 | 0.93085300  |
| C | 0.83893600  | -0.26592200 | 0.97668800  |
| C | 0.92663300  | 1.05421300  | 0.26385600  |
| H | 2.15148900  | 2.22236000  | -1.12074000 |
| H | 4.01985000  | 0.57841400  | -1.21589300 |
| H | 1.82761000  | -2.06304100 | 1.48141700  |
| H | -0.04486000 | -0.45117700 | 1.57775700  |
| O | 3.99710000  | -1.67166000 | 0.09948900  |

## Int16

|   |            |             |             |
|---|------------|-------------|-------------|
| C | 2.04442500 | 1.17928600  | -0.80433700 |
| C | 3.14691600 | 0.42569800  | -0.74904200 |
| C | 3.23018100 | -0.74252100 | 0.15239500  |
| C | 2.04845600 | -1.03774500 | 0.98879200  |
| C | 0.94272300 | -0.28623900 | 0.92725800  |
| C | 0.85789100 | 0.88194300  | 0.02814800  |
| H | 1.96565500 | 2.04143100  | -1.46084900 |
| H | 4.02143300 | 0.63653200  | -1.35688800 |
| H | 2.12295000 | -1.89347000 | 1.65258500  |
| H | 0.07504800 | -0.50850200 | 1.54372700  |

|   |             |             |             |   |             |             |             |
|---|-------------|-------------|-------------|---|-------------|-------------|-------------|
| O | 4.23785300  | -1.43860100 | 0.20505400  | H | -0.20243100 | -1.01096300 | -0.90133600 |
| N | -0.42310900 | 1.23042100  | -0.57656000 | O | -4.49989700 | -1.49459000 | 0.29474900  |
| N | 0.09792000  | 2.05005600  | 0.49297800  | N | 0.59416100  | 1.12199100  | 0.48839600  |
| C | -1.56554400 | 0.41764700  | -0.31501100 | N | -0.06788100 | 1.68478400  | -0.54760000 |
| C | -1.65963300 | -0.82325600 | -0.95267800 | C | 1.76511200  | 0.41994800  | 0.22119600  |
| C | -2.61379200 | 0.88759600  | 0.47433300  | C | 2.48611700  | 0.03898600  | 1.37031800  |
| C | -2.80081000 | -1.59678700 | -0.78139400 | C | 2.27515300  | 0.12137900  | -1.05823200 |
| H | -0.83536600 | -1.17158100 | -1.56898900 | C | 3.71352000  | -0.59008200 | 1.24443400  |
| C | -3.75694400 | 0.10366900  | 0.63392400  | H | 2.06294300  | 0.26878600  | 2.34324700  |
| H | -2.54836500 | 1.86286200  | 0.94848400  | C | 3.50705200  | -0.50717200 | -1.16998000 |
| C | -3.85441400 | -1.13738300 | 0.01253400  | H | 1.71348600  | 0.34544400  | -1.95981200 |
| H | -2.86835900 | -2.56413700 | -1.26980600 | C | 4.22764500  | -0.86013600 | -0.02643600 |
| H | -4.57290200 | 0.47254100  | 1.24798400  | H | 4.27170000  | -0.87374900 | 2.13056600  |
| H | -4.74475800 | -1.74440900 | 0.14205100  | H | 3.90328200  | -0.73829200 | -2.15337800 |
| H | -0.35856900 | 1.78274900  | 1.37679400  | H | 5.18674900  | -1.35848500 | -0.12722200 |
|   |             |             |             | H | 0.37524600  | 1.65931900  | -1.47128500 |

## TS18

|   |             |             |             |              |            |             |             |
|---|-------------|-------------|-------------|--------------|------------|-------------|-------------|
| C | -2.41028600 | 1.42187700  | 0.14767700  | <b>int17</b> |            |             |             |
| C | -3.50455100 | 0.64789500  | 0.36067900  | C            | 2.18190500 | 1.29567800  | -0.31243800 |
| C | -3.48834100 | -0.79608500 | 0.10885800  | C            | 3.53704600 | 1.19418000  | -0.28263300 |
| C | -2.23360600 | -1.35158900 | -0.37473000 | C            | 4.20015900 | -0.06820100 | 0.01508700  |
| C | -1.13186500 | -0.57319200 | -0.54740700 | C            | 3.32576700 | -1.20837100 | 0.28193000  |
| C | -1.19189700 | 0.83846800  | -0.31614100 | C            | 1.97210300 | -1.10198600 | 0.25249900  |
| H | -2.43151200 | 2.49488600  | 0.31443500  | C            | 1.37111400 | 0.15448000  | -0.04967200 |
| H | -4.44163700 | 1.07711100  | 0.70319500  | H            | 1.69761100 | 2.24405800  | -0.53743900 |
| H | -2.20693400 | -2.41653900 | -0.58338400 | H            | 4.16785300 | 2.05521900  | -0.48033600 |

|              |             |             |             |   |             |             |             |
|--------------|-------------|-------------|-------------|---|-------------|-------------|-------------|
| H            | 3.80621800  | -2.15435400 | 0.51274300  | H | -3.71879400 | -0.18333600 | -2.01932400 |
| H            | 1.33412300  | -1.95558700 | 0.45785800  | H | -3.62337900 | 1.06891800  | 2.08328900  |
| O            | 5.44045800  | -0.17406400 | 0.04689100  | H | -1.14695700 | 0.82619200  | 2.10105900  |
| N            | -0.82995000 | -0.63049600 | 0.03876100  | O | -5.16128300 | 0.58276600  | -0.04472200 |
| N            | 0.02402100  | 0.30276300  | -0.10327800 | N | 0.38805800  | 0.01849300  | 0.06380500  |
| C            | -2.17784000 | -0.25302100 | 0.04051300  | N | 0.89529800  | -1.02348800 | 0.84196800  |
| C            | -3.08577200 | -1.27650700 | -0.27003000 | S | 1.08994500  | -2.47073000 | 0.00601500  |
| C            | -2.65757700 | 1.02813600  | 0.36176600  | C | 1.18890300  | 1.19045200  | 0.04102200  |
| C            | -4.44829800 | -1.01397900 | -0.30616600 | C | 0.66615100  | 2.37169400  | -0.50352300 |
| H            | -2.69704600 | -2.26493100 | -0.49433500 | C | 2.51345400  | 1.17486900  | 0.49502300  |
| C            | -4.02496700 | 1.27666400  | 0.32477800  | C | 1.45950700  | 3.51157500  | -0.58730500 |
| H            | -1.98865900 | 1.82127700  | 0.68516800  | H | -0.35593900 | 2.39906300  | -0.86530000 |
| C            | -4.92342900 | 0.26530000  | -0.01467500 | C | 3.29276700  | 2.32539500  | 0.40508300  |
| H            | -5.14169000 | -1.80982200 | -0.55907700 | H | 2.92735800  | 0.26948900  | 0.92236100  |
| H            | -4.39127000 | 2.26558500  | 0.58215700  | C | 2.77727200  | 3.50116100  | -0.13475300 |
| H            | -5.98909200 | 0.46988600  | -0.03575600 | H | 1.03556300  | 4.41653600  | -1.01275200 |
| H            | -0.30147400 | 1.26107500  | -0.30024400 | H | 4.31683200  | 2.29487800  | 0.76587900  |
| <b>Int18</b> |             |             |             | H | 3.39072200  | 4.39382200  | -0.20207200 |
| C            | -1.76263100 | -0.12049300 | -1.10422700 | O | -0.03368800 | -2.75531300 | -0.88443700 |
| C            | -3.14380000 | 0.02767900  | -1.12338400 | O | 1.41658600  | -3.44482900 | 1.04610300  |
| C            | -3.81103500 | 0.45420400  | 0.02762500  | C | 2.50440900  | -2.10645400 | -0.98979500 |
| C            | -3.09517400 | 0.73421800  | 1.19472800  | H | 3.35733000  | -1.92004100 | -0.33611200 |
| C            | -1.71252500 | 0.59308000  | 1.20186700  | H | 2.68341100  | -2.97779200 | -1.62420900 |
| C            | -1.04447200 | 0.15786100  | 0.05692100  | H | 2.27831500  | -1.23320800 | -1.60631500 |
| H            | -1.23137300 | -0.45268300 | -1.99037800 | H | 0.40181900  | -1.18093700 | 1.72710900  |
|              |             |             |             | H | -5.50738900 | 0.89332100  | 0.80885900  |

**Int19**

|   |             |             |             |
|---|-------------|-------------|-------------|
| C | -1.84685300 | 1.20018100  | 0.67839600  |
| C | -3.11039900 | 0.64580500  | 0.64525500  |
| C | -3.34278200 | -0.52044100 | -0.09946000 |
| C | -2.29794400 | -1.13366200 | -0.80562100 |
| C | -1.02599700 | -0.59341200 | -0.76169800 |
| C | -0.81252400 | 0.57731300  | -0.02838200 |
| H | -1.65574600 | 2.07975900  | 1.28646700  |
| H | -3.92829700 | 1.08740900  | 1.20354600  |
| H | -2.49221600 | -2.03120900 | -1.38482600 |
| H | -0.21843100 | -1.05629300 | -1.31844900 |
| O | -4.59243500 | -1.00859100 | -0.08881200 |
| N | 0.48950800  | 1.17940900  | -0.02079700 |
| N | 0.68531700  | 2.40715300  | -0.04416000 |
| C | 1.65976700  | 0.33239000  | 0.03074100  |
| C | 1.62806800  | -0.82809800 | 0.80218400  |
| C | 2.79262500  | 0.73965900  | -0.67124900 |
| C | 2.78400000  | -1.59682600 | 0.87517500  |
| H | 0.73744900  | -1.10719200 | 1.35470800  |
| C | 3.93231700  | -0.04974200 | -0.59415700 |
| H | 2.76559800  | 1.63979900  | -1.27562300 |
| C | 3.92883800  | -1.21169900 | 0.17861900  |
| H | 2.78823500  | -2.49625800 | 1.48111000  |
| H | 4.82161200  | 0.23921900  | -1.14379000 |
| H | 4.82402100  | -1.82257100 | 0.23513900  |

|   |             |             |             |
|---|-------------|-------------|-------------|
| H | -0.21420300 | 2.89446900  | -0.16803600 |
| H | -4.64700800 | -1.83314400 | -0.60387600 |

**TS19**

|   |             |             |             |
|---|-------------|-------------|-------------|
| C | 1.14061500  | -0.09983500 | -1.01215500 |
| C | 2.40526900  | -0.60577200 | -1.20192800 |
| C | 3.36110400  | -0.45851100 | -0.18377500 |
| C | 3.03645000  | 0.17282400  | 1.05091900  |
| C | 1.77612800  | 0.65619900  | 1.25818000  |
| C | 0.81698900  | 0.53191300  | 0.21943000  |
| H | 0.36973000  | -0.21853700 | -1.76714700 |
| H | 2.68283700  | -1.11235600 | -2.11891800 |
| H | 3.79731800  | 0.24051000  | 1.82260800  |
| H | 1.49358100  | 1.13355400  | 2.19042000  |
| O | 4.57011200  | -0.94663200 | -0.41248100 |
| N | -0.51685700 | 1.05474600  | 0.39709200  |
| N | -0.18786000 | 1.95746400  | -0.51257600 |
| C | -1.71231300 | 0.31164800  | 0.20766300  |
| C | -1.77871400 | -1.01376000 | 0.63994200  |
| C | -2.81429300 | 0.96521000  | -0.34018000 |
| C | -2.97919500 | -1.69747600 | 0.50178100  |
| H | -0.90031500 | -1.49924600 | 1.05463800  |
| C | -4.00443400 | 0.25887100  | -0.48442400 |
| H | -2.74043400 | 2.00939400  | -0.62824100 |
| C | -4.08985100 | -1.06713800 | -0.06396100 |
| H | -3.04528800 | -2.73057400 | 0.82688000  |

|   |             |             |             |
|---|-------------|-------------|-------------|
| H | -4.86966500 | 0.75230000  | -0.91475600 |
| H | -5.02288100 | -1.61059500 | -0.17210400 |
| H | 0.49455200  | 2.59457700  | -0.07930200 |
| H | 5.16613900  | -0.79649800 | 0.34519600  |

**Int20**

|   |             |             |             |
|---|-------------|-------------|-------------|
| C | 0.89382300  | -0.26950300 | -0.94702500 |
| C | 2.01022800  | -1.02254500 | -1.00222200 |
| C | 3.12050700  | -0.68864200 | -0.15686600 |
| C | 3.08855600  | 0.42858500  | 0.73977800  |
| C | 1.97044100  | 1.18042500  | 0.79762100  |
| C | 0.81083900  | 0.88136700  | -0.04415400 |
| H | 0.03456600  | -0.48938000 | -1.57309100 |
| H | 2.11005800  | -1.87621900 | -1.66262800 |
| H | 3.95817300  | 0.63140700  | 1.35697400  |
| H | 1.89125700  | 2.02812300  | 1.47284500  |
| O | 4.15496100  | -1.45964900 | -0.24896600 |
| N | -0.47698300 | 1.25930100  | 0.57723200  |
| N | -0.00994200 | 1.99314400  | -0.54956100 |
| C | -1.61544600 | 0.42520900  | 0.30914700  |
| C | -1.77917200 | -0.71594200 | 1.09544400  |
| C | -2.57047800 | 0.79134200  | -0.63440700 |
| C | -2.90986300 | -1.50492900 | 0.92076000  |
| H | -1.02127000 | -0.97622900 | 1.82898700  |
| C | -3.70621900 | -0.00275600 | -0.79159700 |
| H | -2.42686700 | 1.68727600  | -1.22855500 |

|   |             |             |             |
|---|-------------|-------------|-------------|
| C | -3.87741100 | -1.14993100 | -0.02161900 |
| H | -3.03851700 | -2.39801300 | 1.52434500  |
| H | -4.45737400 | 0.28070000  | -1.52237200 |
| H | -4.76179400 | -1.76566900 | -0.15123400 |
| H | 0.37935300  | 2.86920300  | -0.18611900 |
| H | 4.88636400  | -1.19720500 | 0.34971800  |

**TS20**

|   |             |             |             |
|---|-------------|-------------|-------------|
| C | 1.44598300  | 0.42602900  | -1.24154400 |
| C | 2.63522300  | -0.22008900 | -1.24422900 |
| C | 3.32320900  | -0.56685800 | 0.00002500  |
| C | 2.63476600  | -0.22115900 | 1.24432600  |
| C | 1.44553000  | 0.42496300  | 1.24176800  |
| C | 0.89640300  | 0.92467700  | 0.00023000  |
| H | 0.92091300  | 0.65060100  | -2.16745100 |
| H | 3.11336500  | -0.51823800 | -2.17252300 |
| H | 3.11255600  | -0.52013200 | 2.17253600  |
| H | 0.92011900  | 0.64870200  | 2.16768300  |
| O | 4.42058200  | -1.14587900 | -0.00001800 |
| N | -0.52850200 | 1.29161800  | 0.00008000  |
| N | -0.64963900 | 2.52400000  | 0.00014600  |
| C | -1.61204100 | 0.34021200  | -0.00004500 |
| C | -1.31571300 | -1.02074900 | -0.00046600 |
| C | -2.92314900 | 0.81319800  | 0.00028900  |
| C | -2.36951300 | -1.93130300 | -0.00055200 |
| H | -0.28749500 | -1.36832900 | -0.00074600 |

|   |             |             |             |   |             |             |             |
|---|-------------|-------------|-------------|---|-------------|-------------|-------------|
| C | -3.96121600 | -0.10881800 | 0.00019600  | H | -0.02308000 | -0.93641700 | -0.93473100 |
| H | -3.11113600 | 1.88127700  | 0.00063600  | C | 3.62270800  | -0.50840600 | 0.32388200  |
| C | -3.68623600 | -1.47822100 | -0.00021700 | H | 3.05856200  | 1.54247600  | 0.73759800  |
| H | -2.15566300 | -2.99487800 | -0.00087200 | C | 3.19274400  | -1.73881500 | -0.17423600 |
| H | -4.98820900 | 0.24115700  | 0.00045800  | H | 1.54833000  | -2.84170700 | -1.02303500 |
| H | -4.50331900 | -2.19276200 | -0.00026800 | H | 4.64144600  | -0.38899000 | 0.67901700  |
| H | 0.78172300  | 2.33900200  | 0.00043000  | H | 3.87937600  | -2.57871800 | -0.21175500 |
|   |             |             |             | H | -1.20606200 | 2.30952200  | 0.70436500  |

## Int21

|   |             |             |             |
|---|-------------|-------------|-------------|
| C | -1.11398800 | 0.30552800  | 1.36556200  |
| C | -2.05968800 | -0.63647800 | 1.27969400  |
| C | -2.90901100 | -0.77038600 | 0.07861600  |
| C | -2.64263600 | 0.15332900  | -1.04260200 |
| C | -1.70549400 | 1.10389600  | -0.95235700 |
| C | -0.91845200 | 1.33200700  | 0.29807300  |
| H | -0.48809700 | 0.39260700  | 2.25081400  |
| H | -2.23478600 | -1.34859300 | 2.08070900  |
| H | -3.23909600 | 0.01593500  | -1.93963500 |
| H | -1.50507000 | 1.78669100  | -1.77525800 |
| O | -3.78729500 | -1.62357200 | 0.00900200  |
| N | 0.56174800  | 1.58449300  | -0.04520000 |
| N | 0.96514400  | 2.70183900  | -0.27787600 |
| C | 1.44051400  | 0.40134700  | -0.07662600 |
| C | 0.99214400  | -0.81850800 | -0.57217600 |
| C | 2.74727800  | 0.57095800  | 0.36762700  |
| C | 1.88364700  | -1.88923100 | -0.62521900 |

## TS21

|   |             |             |             |
|---|-------------|-------------|-------------|
| C | -0.88075100 | -0.16920100 | 1.04681200  |
| C | -1.83154000 | -1.10339800 | 0.95874800  |
| C | -3.03798300 | -0.91254200 | 0.12917800  |
| C | -3.15735700 | 0.36343500  | -0.60547400 |
| C | -2.22386200 | 1.31557900  | -0.51445400 |
| C | -1.03880300 | 1.16547500  | 0.36448100  |
| H | -0.00632100 | -0.30178700 | 1.67679200  |
| H | -1.75546800 | -2.04016800 | 1.50266000  |
| H | -4.03529000 | 0.48335300  | -1.23301500 |
| H | -2.29696300 | 2.24907500  | -1.06279900 |
| O | -3.90124900 | -1.77847700 | 0.04946900  |
| N | 0.30956400  | 1.18110900  | -0.65242700 |
| N | 0.16868500  | 2.33306400  | -0.05812700 |
| C | 1.50987900  | 0.39868000  | -0.34866600 |
| C | 1.64515300  | -0.80148300 | -1.03960300 |
| C | 2.48413000  | 0.83906700  | 0.54268300  |



|   |             |             |             |   |             |             |             |
|---|-------------|-------------|-------------|---|-------------|-------------|-------------|
| C | 2.78242400  | -1.57954200 | -0.83791200 | C | -2.66671100 | 1.08723400  | 0.01518500  |
| H | 0.86076000  | -1.10950200 | -1.72560100 | C | -4.00837900 | -1.33461200 | -0.39911500 |
| C | 3.62119200  | 0.06101500  | 0.73397000  | H | -2.08466200 | -2.26124900 | -0.03547400 |
| H | 2.33599600  | 1.77757800  | 1.06705800  | C | -4.02369500 | 1.08093400  | -0.28040800 |
| C | 3.76935300  | -1.14618000 | 0.04676700  | H | -2.13369000 | 2.01793000  | 0.17553900  |
| H | 2.90003700  | -2.51820200 | -1.37019200 | C | -4.69648200 | -0.12696100 | -0.48605100 |
| H | 4.39352700  | 0.39149700  | 1.42183900  | H | -4.52846900 | -2.27373600 | -0.55937100 |
| H | 4.65839500  | -1.74966200 | 0.20301700  | H | -4.56286900 | 2.02053200  | -0.35280900 |
| H | -1.04343500 | 1.86099700  | 1.23919700  | H | -5.75759800 | -0.12207700 | -0.71612900 |
|   |             |             |             | H | 1.56939600  | 1.17046700  | 1.90591600  |

## Int22

|   |             |             |             |
|---|-------------|-------------|-------------|
| C | 2.16892200  | 1.48070300  | -0.08495200 |
| C | 3.25027200  | 1.02592200  | -0.72442900 |
| C | 3.76789800  | -0.33608300 | -0.48760900 |
| C | 3.01195500  | -1.18980800 | 0.45004400  |
| C | 1.91895000  | -0.74314600 | 1.07652400  |
| C | 1.42961100  | 0.66459300  | 0.93495400  |
| H | 1.78398800  | 2.48059100  | -0.26916400 |
| H | 3.78829200  | 1.63309700  | -1.44649000 |
| H | 3.38630900  | -2.19932200 | 0.59374600  |
| H | 1.36377300  | -1.38610400 | 1.75353500  |
| O | 4.77584100  | -0.74489600 | -1.05515100 |
| N | -0.58377700 | -0.24781800 | 0.39554200  |
| N | -0.01359100 | 0.82009400  | 0.65217000  |
| C | -1.98077500 | -0.12845700 | 0.10250500  |
| C | -2.64650400 | -1.33480000 | -0.10699200 |

20220420-zy1-72-61

7.8919  
7.8865  
7.8834  
7.8786  
7.8742  
7.8683  
7.5042  
7.4896  
7.4824  
7.4801  
6.9573  
6.9473  
6.9377  
6.9336  
6.9276

5.3637

0.0050

20220420-zy1-72-61

7.8919  
7.8865  
7.8834  
7.8786  
7.8742  
7.8683

7.5186  
7.5153  
7.5042  
7.4886

7.4570  
7.4465  
7.4414  
7.4279

7.2601

6.9573  
6.9513  
6.9473  
6.9377  
6.9336  
6.9276

$^1\text{H NMR}$  (500 MHz,  $\text{CDCl}_3$ )

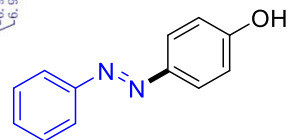

**3a**

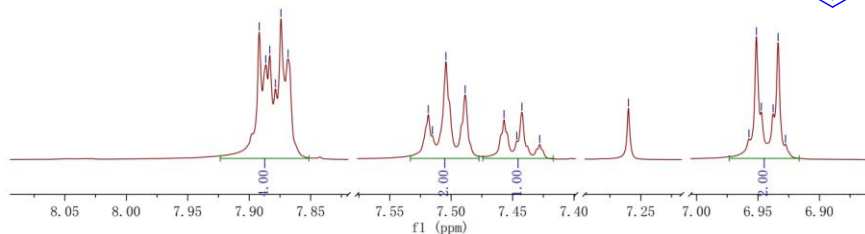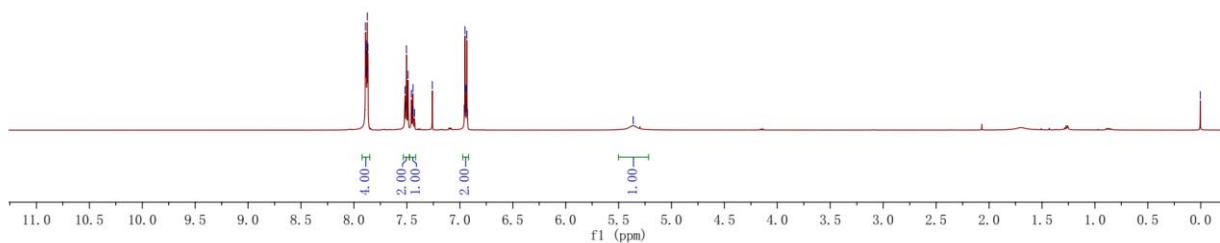

20230227-zy1-80-39

158.3604  
152.8476  
147.3516

130.5966  
129.1976  
125.1348  
122.7177

115.9514

77.4142  
77.1602  
76.9082

$^{13}\text{C NMR}$  (125 MHz,  $\text{CDCl}_3$ )

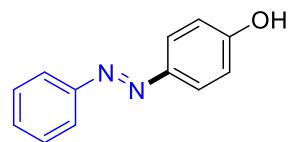

**3a**

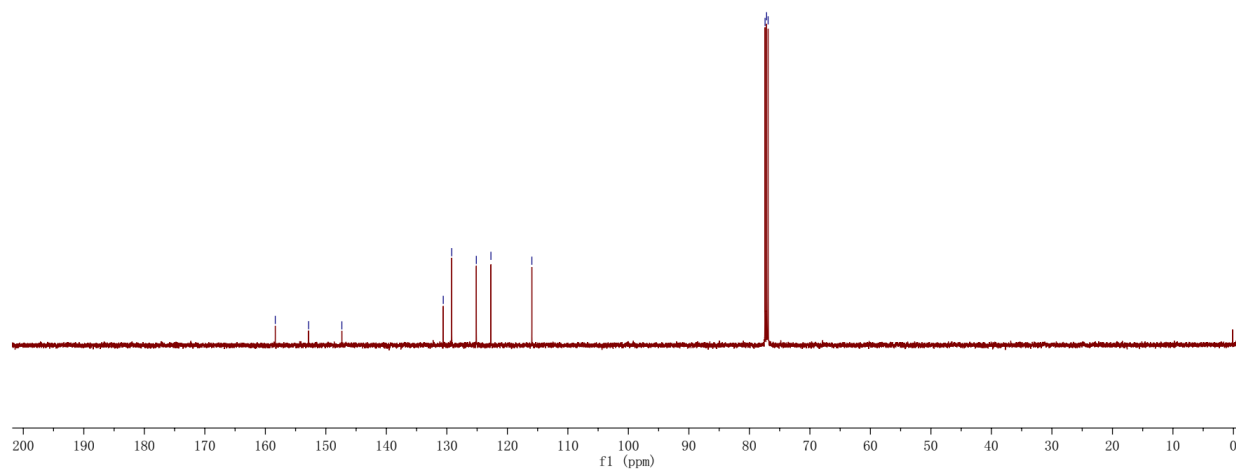

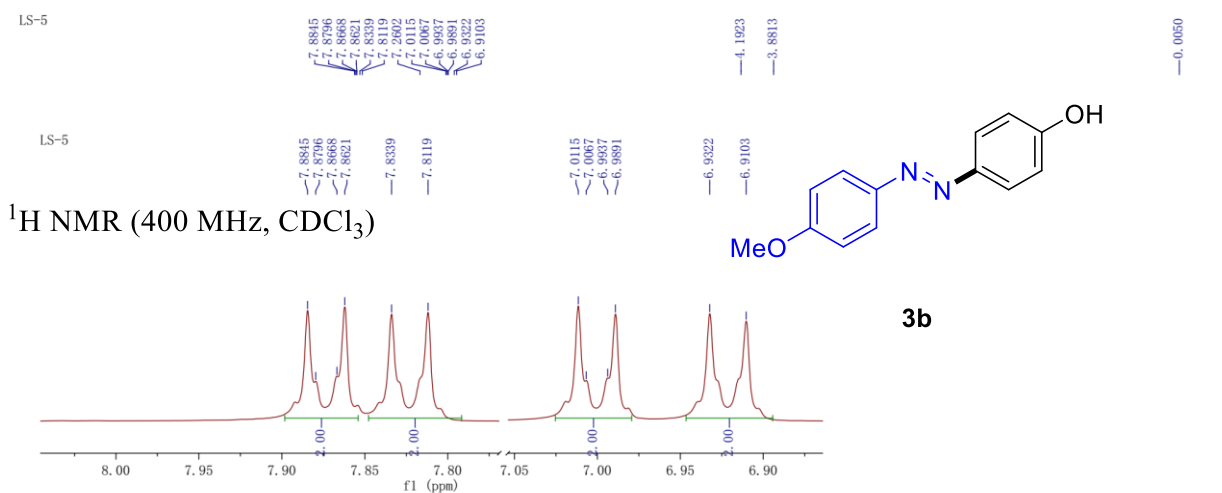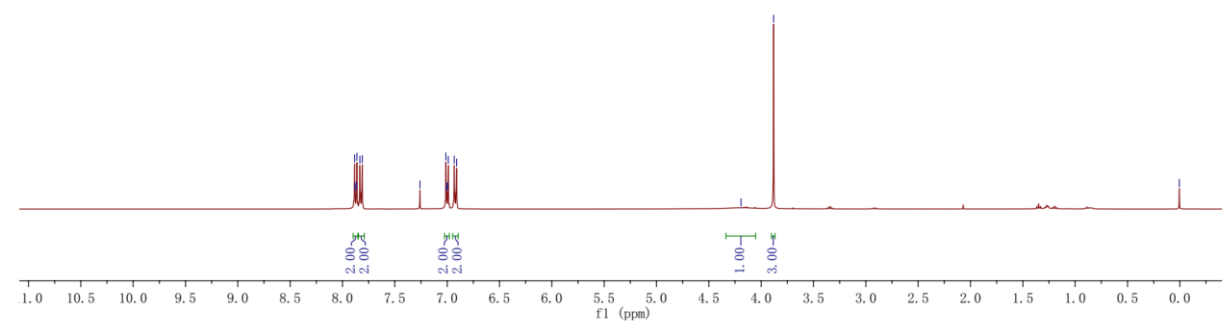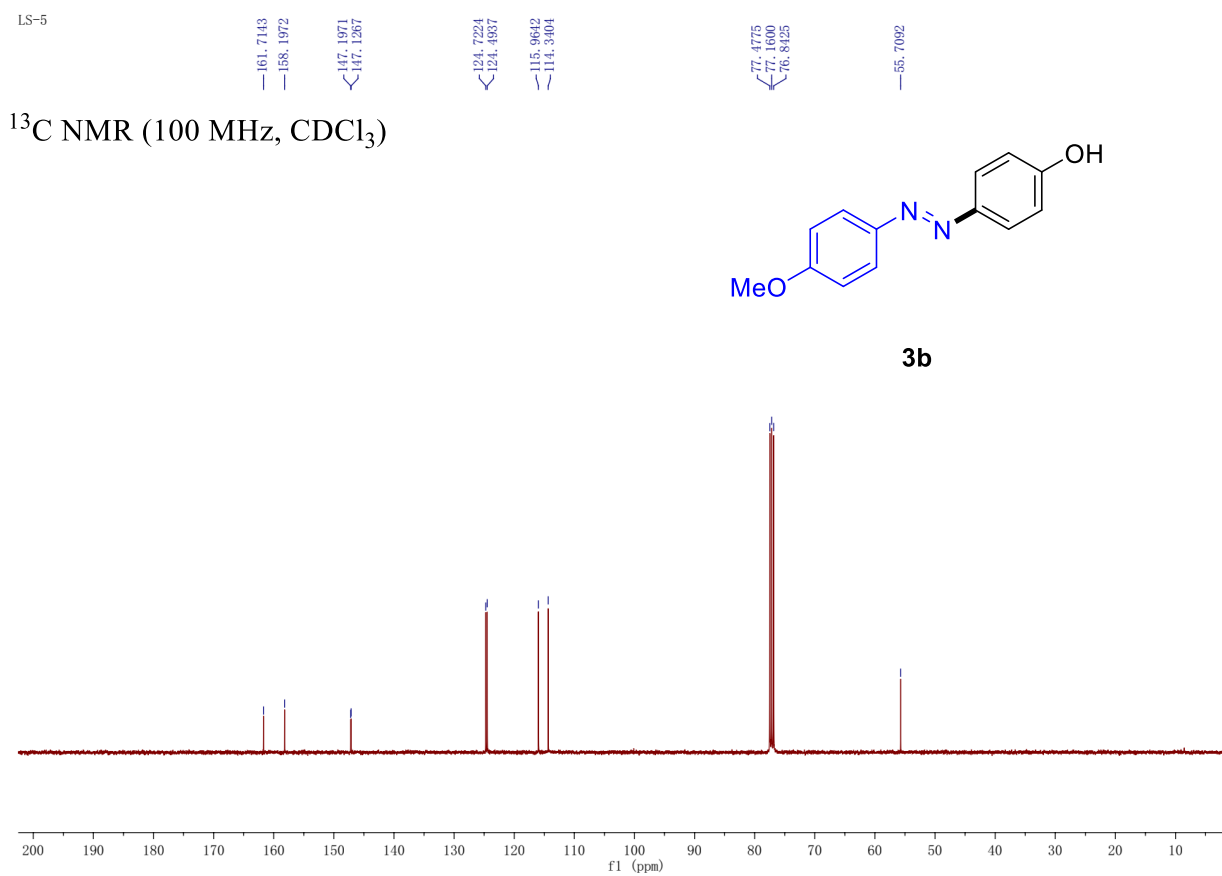

20230509-zy1-85-72

7.8679  
7.8505  
7.8210  
7.8041  
7.5284  
7.5094  
7.2600  
6.9398  
6.9224

5.2983

1.3711

0.0060

20230509-zy1-85-72

7.8679  
7.8505  
7.8210  
7.8041

7.5284  
7.5094

7.2600

6.9398  
6.9224

$^1\text{H NMR}$  (500 MHz,  $\text{CDCl}_3$ )

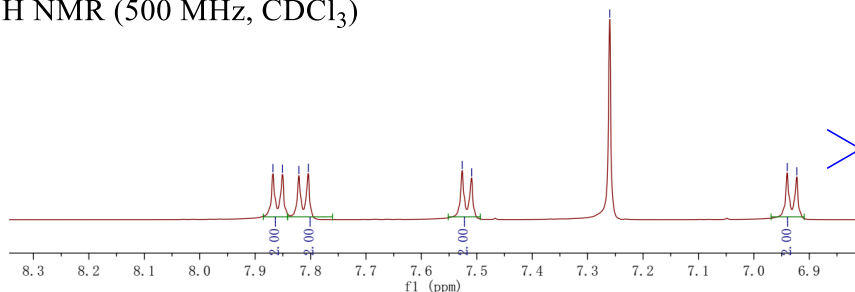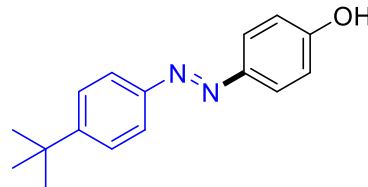

**3c**

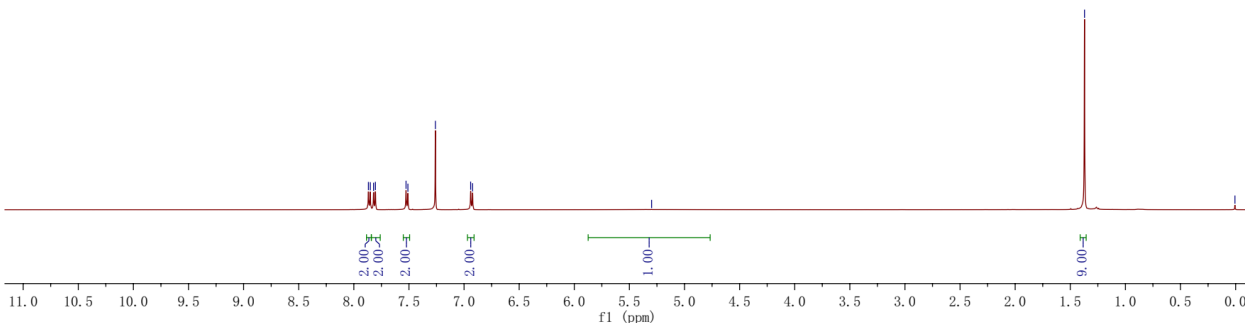

20230511-zy1-85-72

158.1851  
154.1820  
150.7687  
147.4390

126.1251  
124.9543  
122.4192  
115.9196

77.4144  
77.1604  
76.9063

35.1022  
31.4297

$^{13}\text{C NMR}$  (125 MHz,  $\text{CDCl}_3$ )

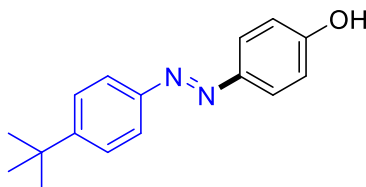

**3c**

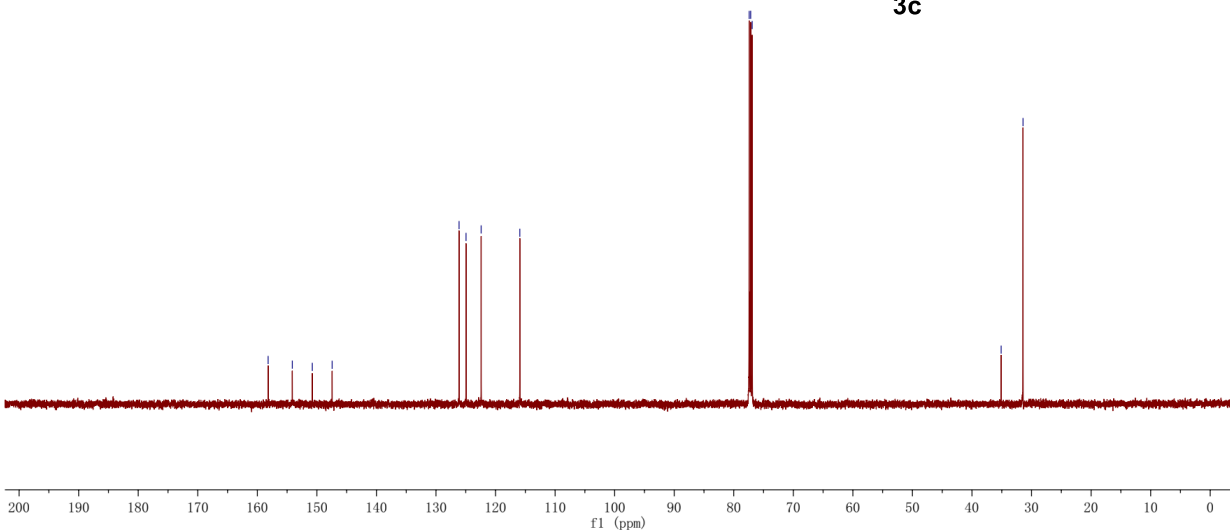

20230515-zy1-85-82

7.8761  
7.8685  
7.3228  
7.3202  
7.3178  
7.2432  
6.9216

4.1297

2.6880

20230515-zy1-85-82

7.8761  
7.8685

7.5878  
7.5720

7.3228  
7.3202  
7.3178  
7.2604  
7.2533  
7.2432  
7.2270

6.9222  
6.9216

<sup>1</sup>H NMR (500 MHz, CDCl<sub>3</sub>)

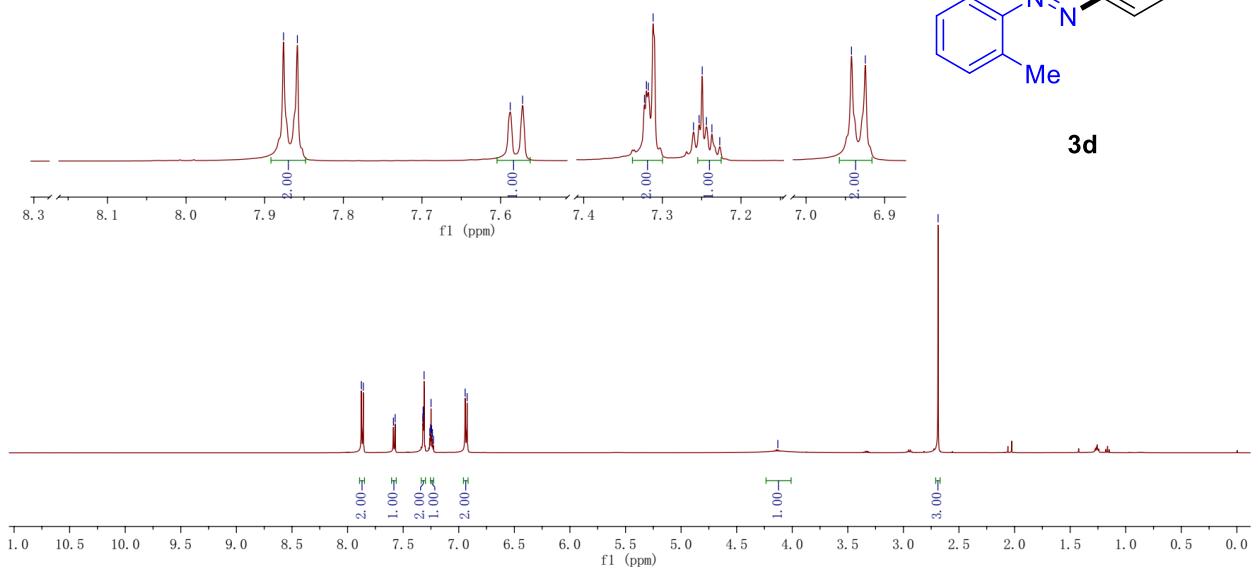

20230517-zy1-85-82

158.4744

150.9539

147.6676

137.6369

131.2960

130.4550

128.5528

125.1665

115.9553

115.5750

77.4142

77.1603

76.9061

17.6650

<sup>13</sup>C NMR (125 MHz, CDCl<sub>3</sub>)

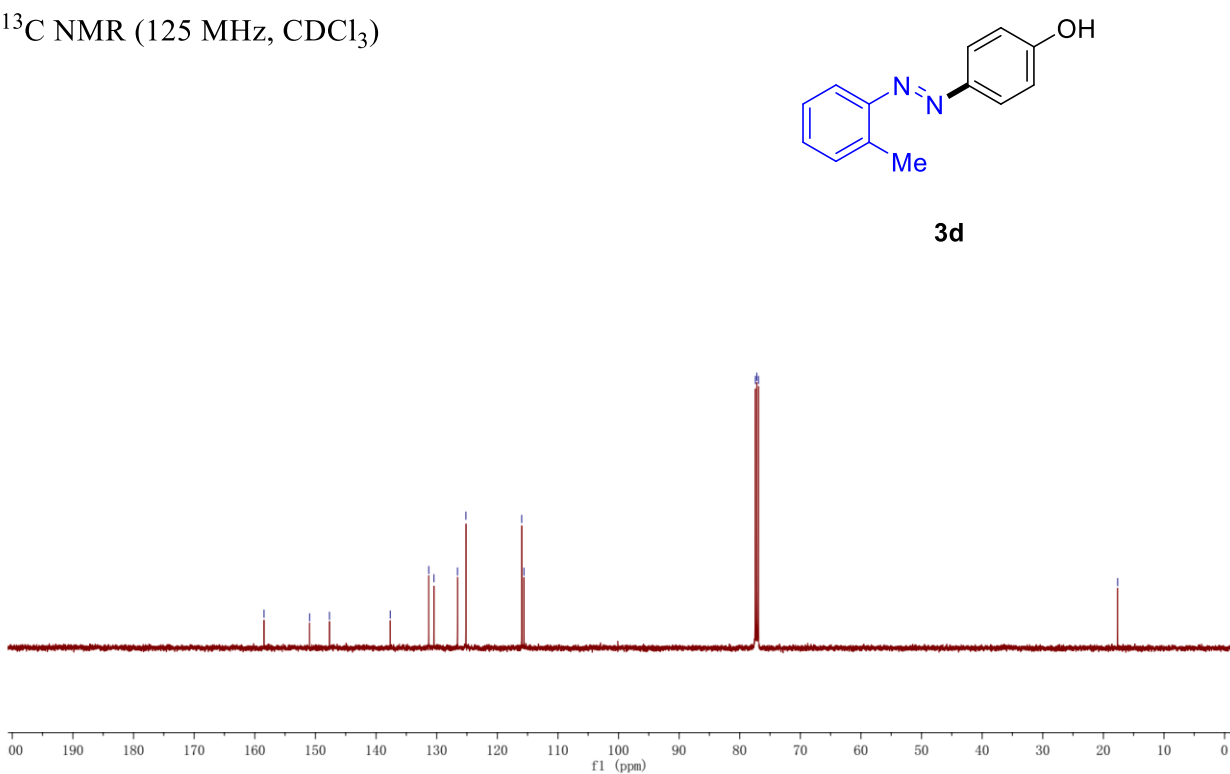

20230407-85-31  
10.4071

7.8258  
7.8108  
7.7953  
7.6117  
7.5956  
6.9576  
6.9411

3.3569  
2.4997

20230407-85-31  
7.8258  
7.8108  
7.7953  
7.6117  
7.5956  
6.9576  
6.9411

$^1\text{H NMR}$  (500 MHz,  $\text{DMSO-}d_6$ )

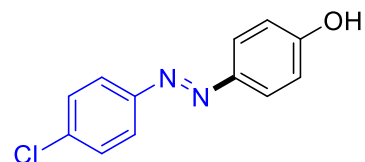

**3e**

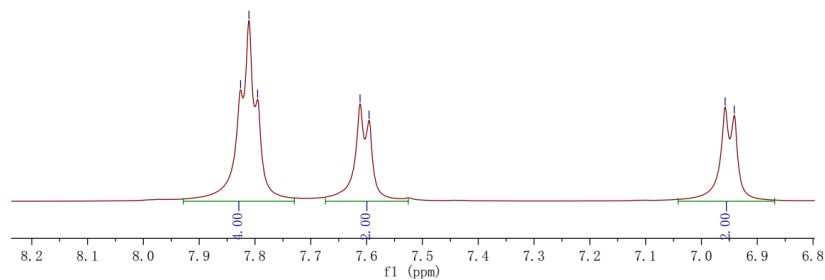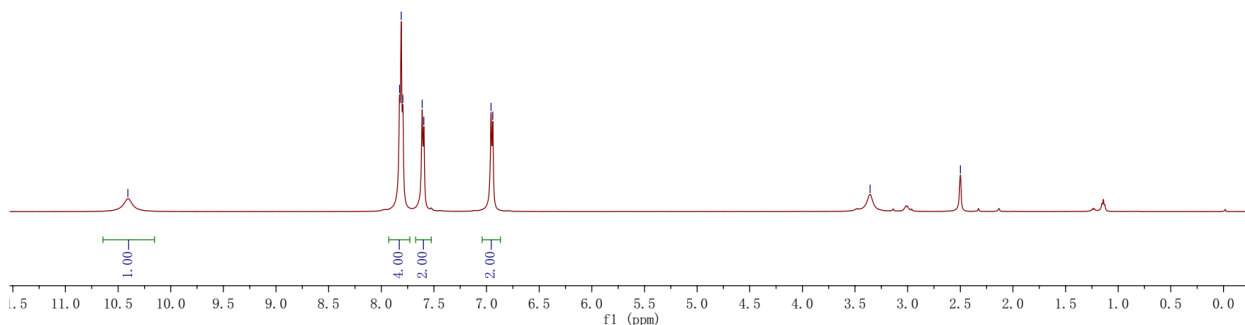

20230411-zyl-85-31  
161.2851  
150.6856  
145.0882  
134.8013  
129.4021  
125.0231  
123.7219  
115.9910

40.0201  
39.8536  
39.6866  
39.5198  
39.3529  
39.1856  
39.0188

$^{13}\text{C NMR}$  (125 MHz,  $\text{DMSO-}d_6$ )

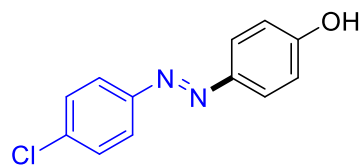

**3e**

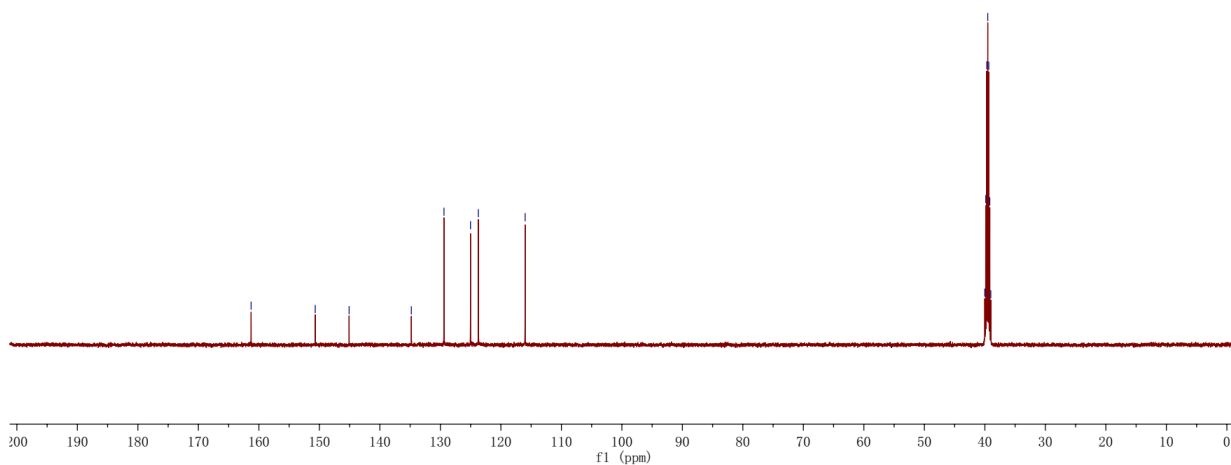

20230515-zy1-85-73

7.8787  
7.8615  
7.7606  
7.7436  
7.6329  
7.6159  
7.2602  
6.9317

5.4068

1.6940

20230515-zy1-85-73

7.8787  
7.8615  
7.7606  
7.7436

7.6329  
7.6159

7.2602

6.9317  
6.9317

$^1\text{H NMR}$  (500 MHz,  $\text{CDCl}_3$ )

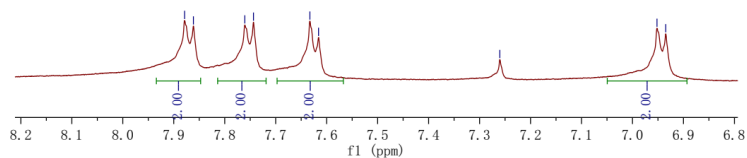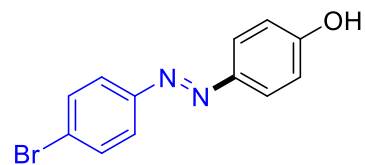

**3f**

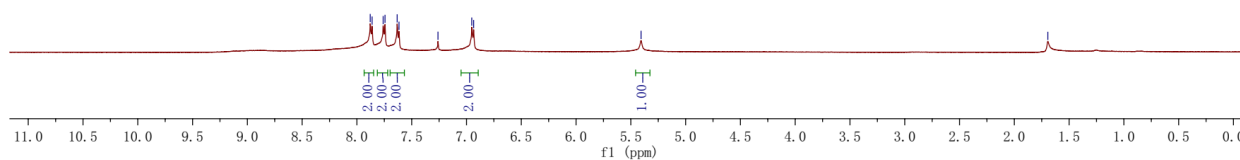

20230518-zy1-85-73

161.3060

150.9933

145.1040

132.3598

125.9522

123.9810

123.6315

116.0089

40.0208  
39.8535  
39.6862  
39.5107  
39.3359  
39.1860  
39.0188

$^{13}\text{C NMR}$  (125 MHz,  $\text{DMSO-}d_6$ )

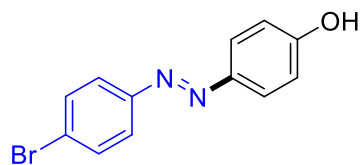

**3f**

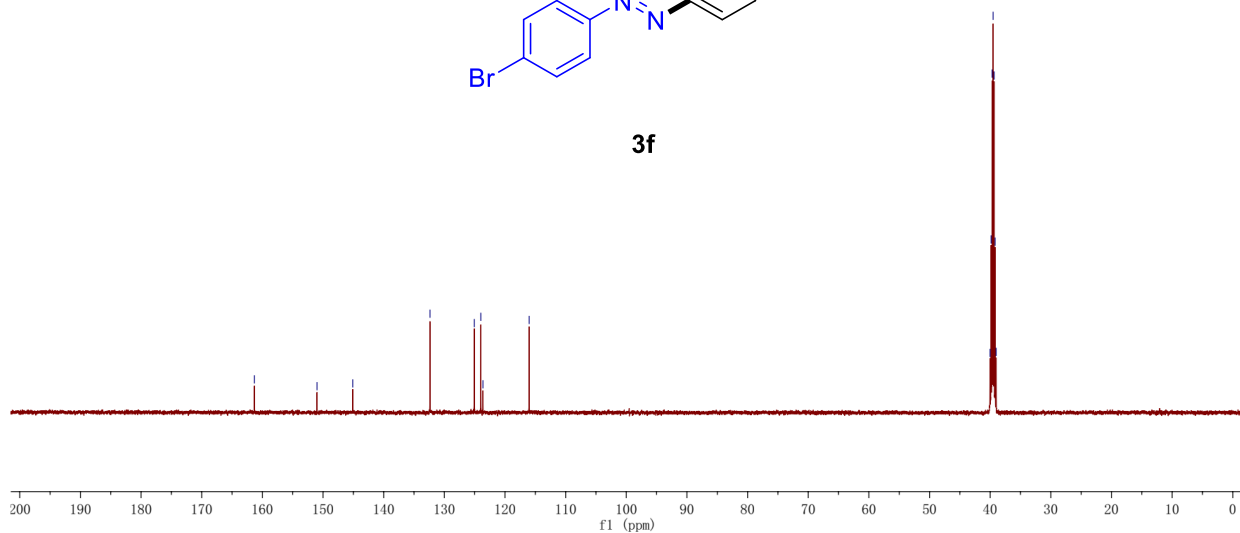

LS-2-7

8.1881  
8.1672  
7.9161  
7.9089  
7.8943  
7.8876  
7.2604  
6.9884  
6.9667  
6.2277  
4.4510  
4.4332  
4.4154  
4.3976  
1.4485  
1.4307  
1.4129  
0.0000

LS-2-7

8.1881  
8.1672  
7.9161  
7.9089  
7.8943  
7.8876  
7.2604  
6.9884  
6.9667

<sup>1</sup>H NMR (400 MHz, CDCl<sub>3</sub>)

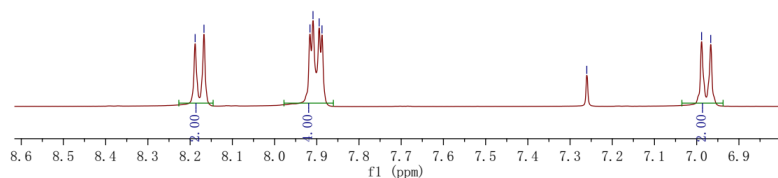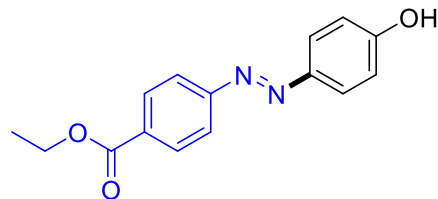

**3g**

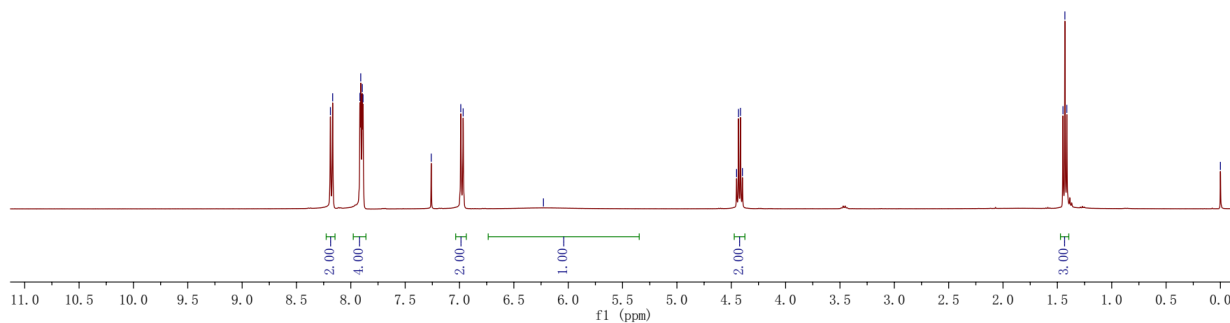

LS-2-7

166.6469  
159.4298  
155.4696  
147.1860  
131.5465  
130.7257  
125.5840  
122.4970  
116.1088  
77.4777  
77.1601  
76.8428  
61.5291  
14.4569

<sup>13</sup>C NMR (100 MHz, CDCl<sub>3</sub>)

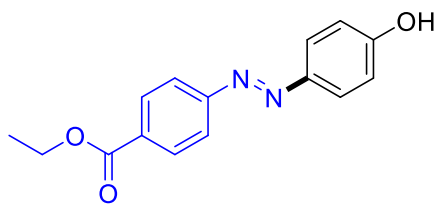

**3g**

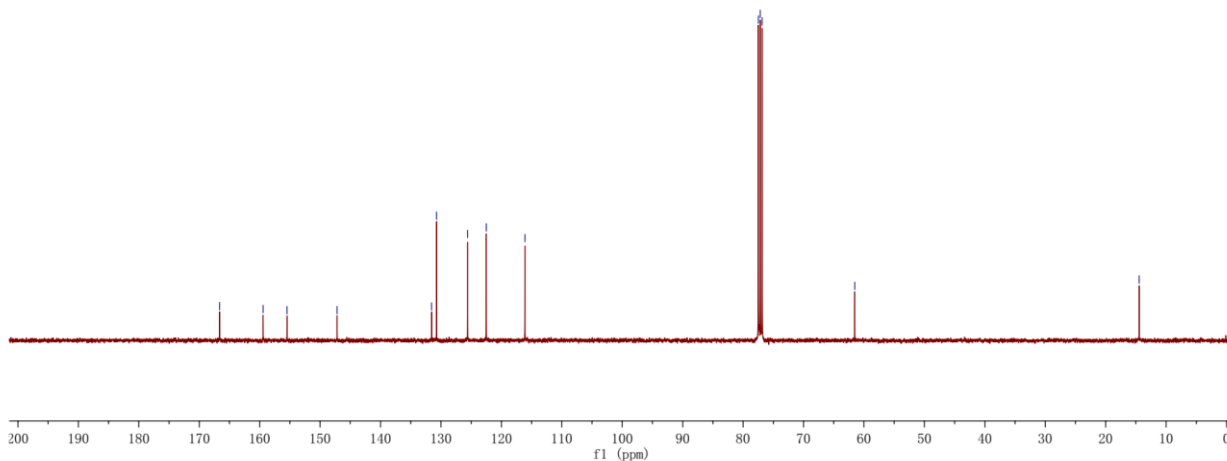



20230515-zy1-85-1

10.5113

8.0247  
8.0211  
8.0111  
8.0075  
7.9269  
7.9167  
7.9133  
7.8926  
7.8587  
7.8525  
7.8489  
7.8449  
7.8404  
6.9752  
6.9649  
6.9614

3.3340

2.5034  
2.4939  
2.4963

### $^1\text{H}$ NMR (500 MHz, $\text{DMSO-}d_6$ )

20230515-zy1-85-1

8.0247  
8.0211  
8.0111  
8.0075

7.9305  
7.9269  
7.9167  
7.9133

7.8626  
7.8587  
7.8525  
7.8489  
7.8449  
7.8344

6.9792  
6.9752  
6.9649  
6.9614

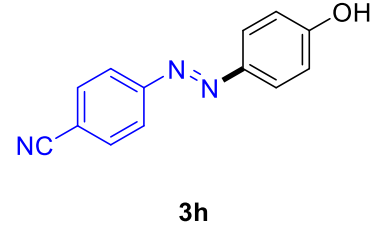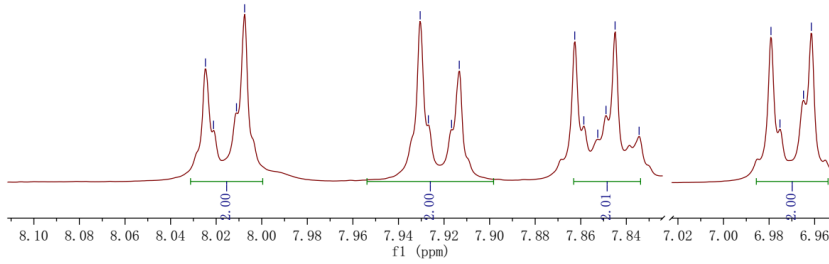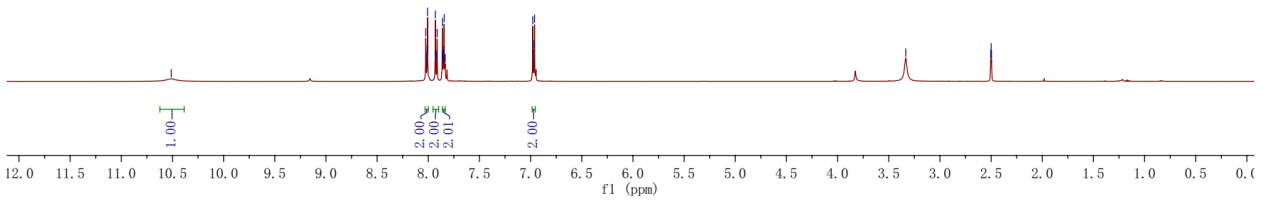

20230517-zy1-85-1

162.0904

154.3051

145.2588

133.6942

125.6134  
122.7498  
118.5480  
116.1533  
112.1876

40.0209  
39.8538  
39.6871  
39.5201  
39.3532  
39.1863  
39.0192

20230517-zy1-85-1

162.0904

154.3051

145.2588

133.6942

125.6134

122.7498

118.5480

116.1533

112.1876

### $^{13}\text{C}$ NMR (125 MHz, $\text{DMSO-}d_6$ )

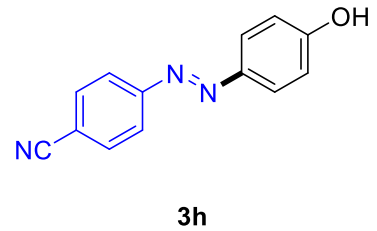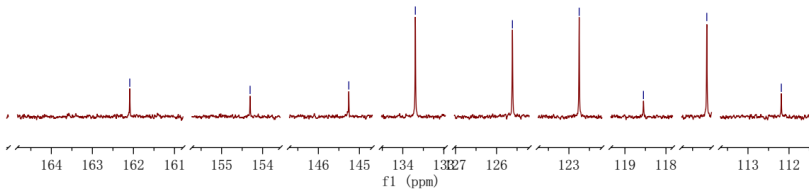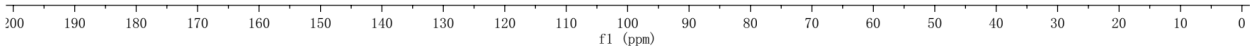

20230515-zy1-85-2

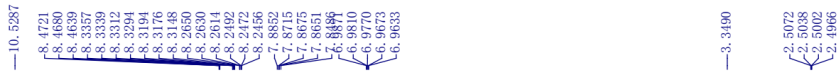

20230515-zy1-85-2

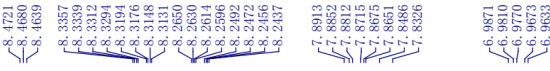

<sup>1</sup>H NMR (500 MHz, DMSO-*d*<sub>6</sub>)

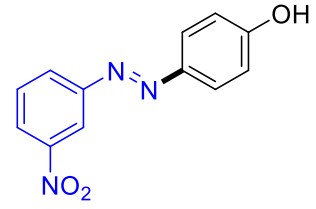

**3i**

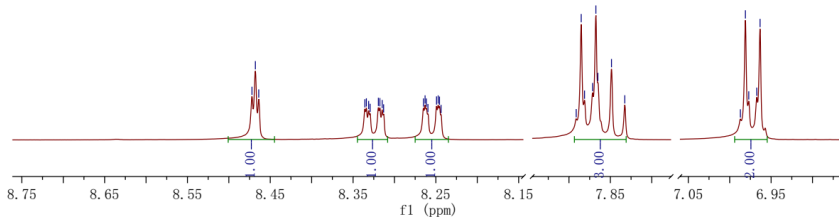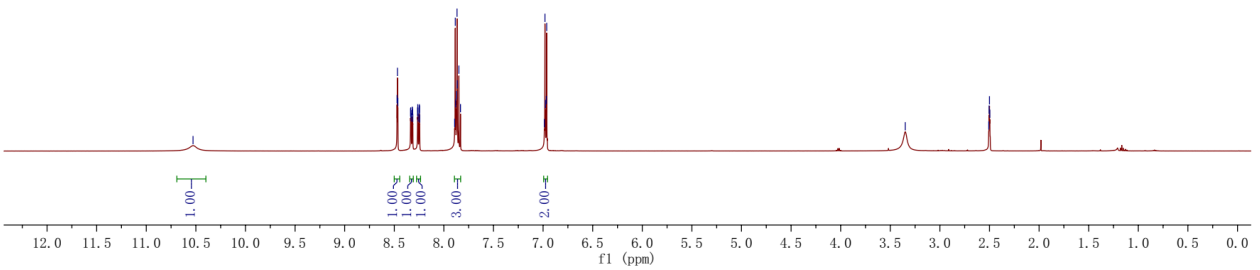

20230517-zy1-85-2

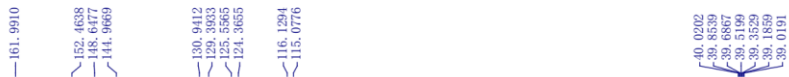

<sup>13</sup>C NMR (125 MHz, DMSO-*d*<sub>6</sub>)

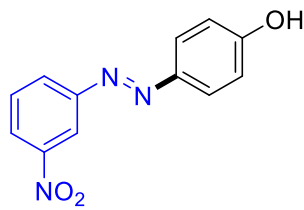

**3i**

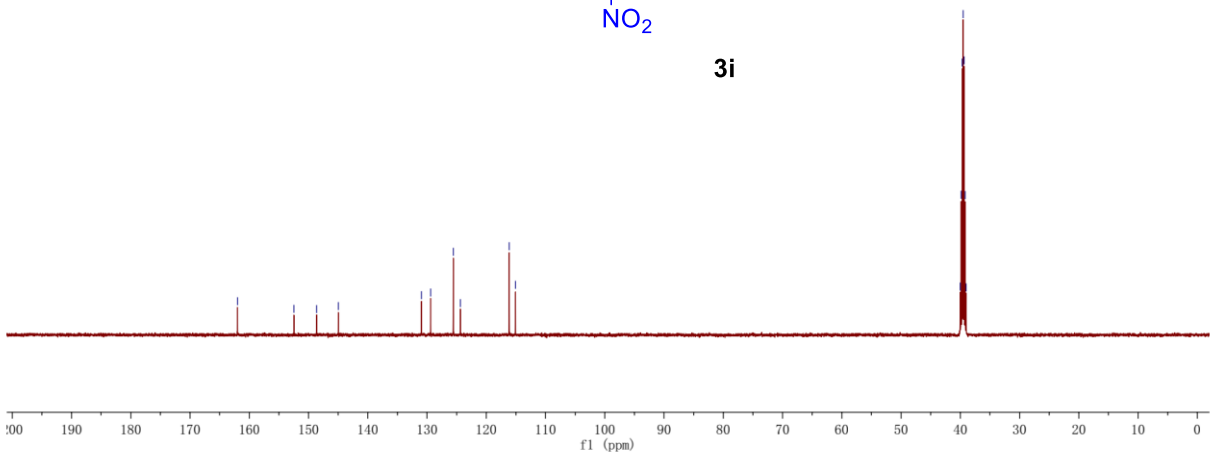

20230515-zy1-85-74

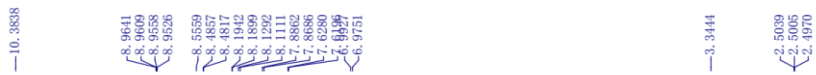

20230515-zy1-85-74

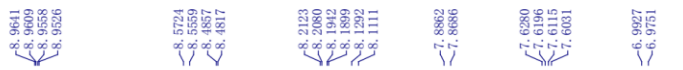

<sup>1</sup>H NMR (500 MHz, DMSO-*d*<sub>6</sub>)

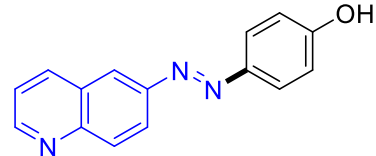

**3j**

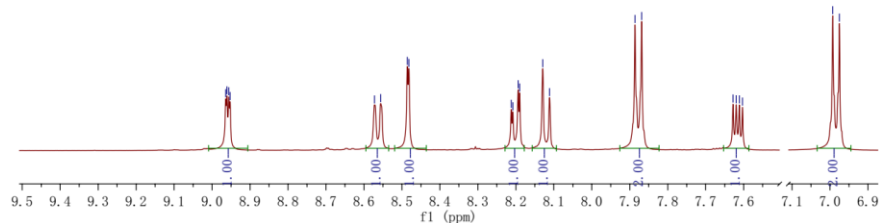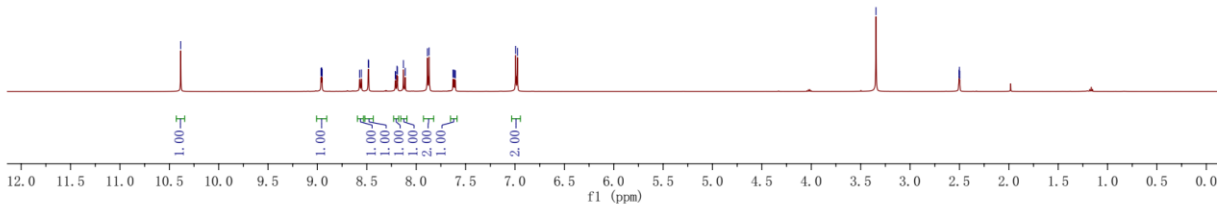

20230517-zy1-85-74

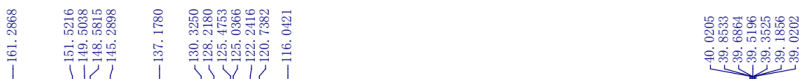

<sup>13</sup>C NMR (125 MHz, DMSO-*d*<sub>6</sub>)

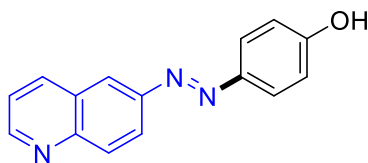

**3j**

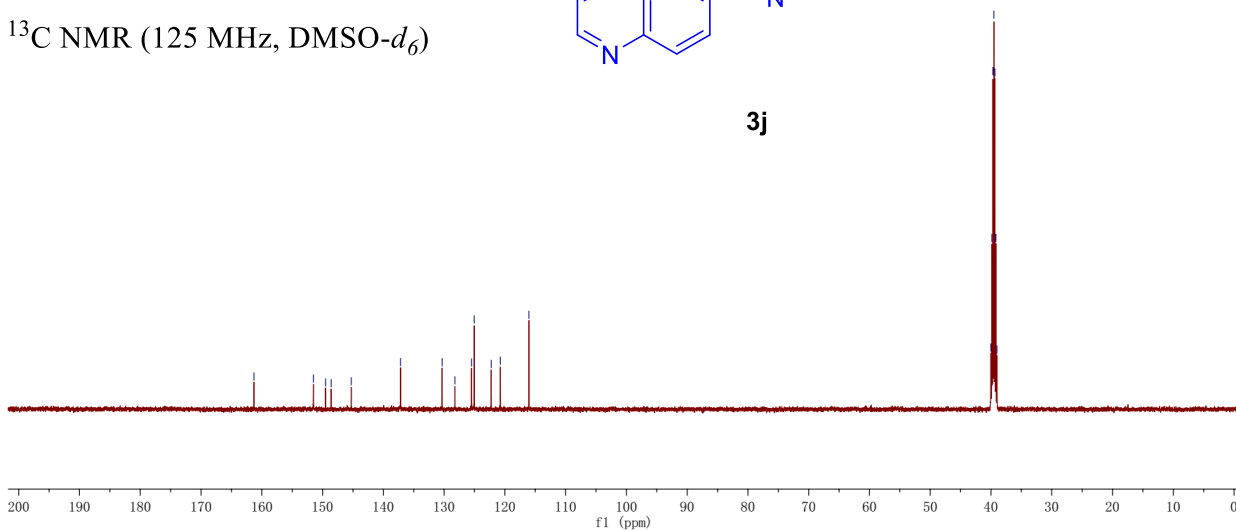

20230518-zy1-85-83

10.4310

7.9014  
7.8936  
7.8285  
7.8224  
7.8184  
7.8087  
7.8047  
7.7987  
7.3956  
7.3848  
6.9751  
6.9691  
6.9651  
6.9553  
6.9514  
6.9452

3.8750

3.3304

2.5036  
2.5001  
2.4965  
2.4931

20230518-zy1-85-83

7.9014  
7.8936  
7.8285  
7.8224  
7.8184  
7.8087  
7.7987

7.3956  
7.3848

6.9751  
6.9691  
6.9651  
6.9553  
6.9514  
6.9452

<sup>1</sup>H NMR (500 MHz, DMSO-*d*<sub>6</sub>)

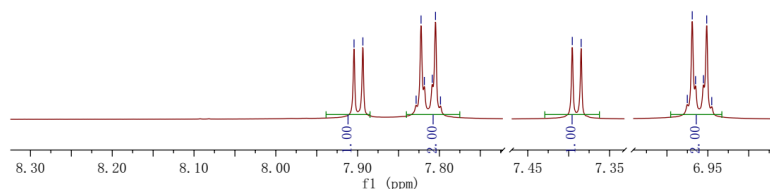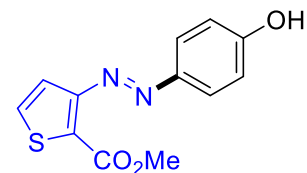

**3k**

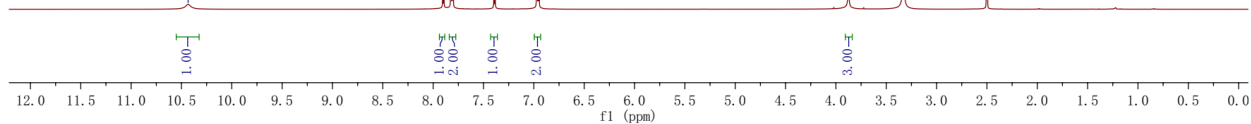

20230519-zy1-85-83

161.6925  
161.1487

156.3313

145.5817

131.9187

127.8937

125.3850

118.6330

116.1158

52.4028

40.0205

39.8534

39.6865

39.5196

39.3528

39.1857

39.0187

<sup>13</sup>C NMR (125 MHz, DMSO-*d*<sub>6</sub>)

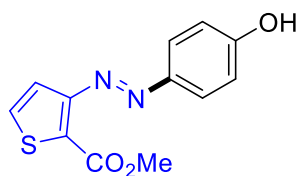

**3k**

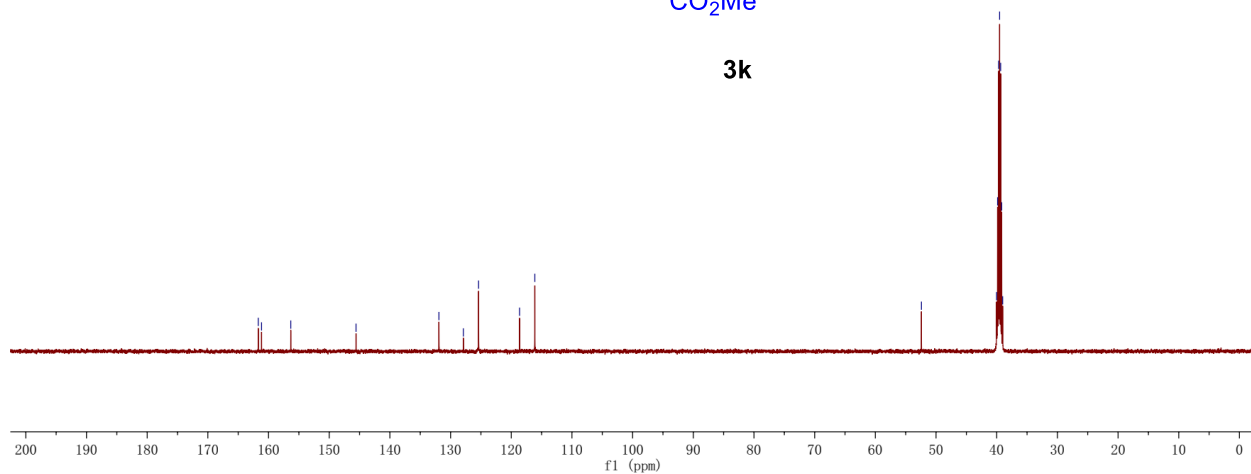

20230321-zy1-80-70

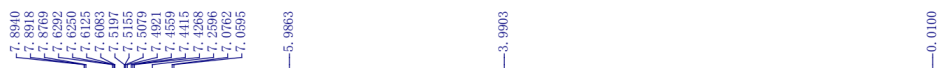

20230321-zy1-80-70

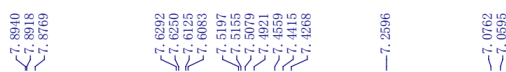

$^1\text{H}$  NMR (500 MHz,  $\text{CDCl}_3$ )

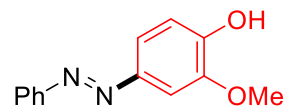

**31**

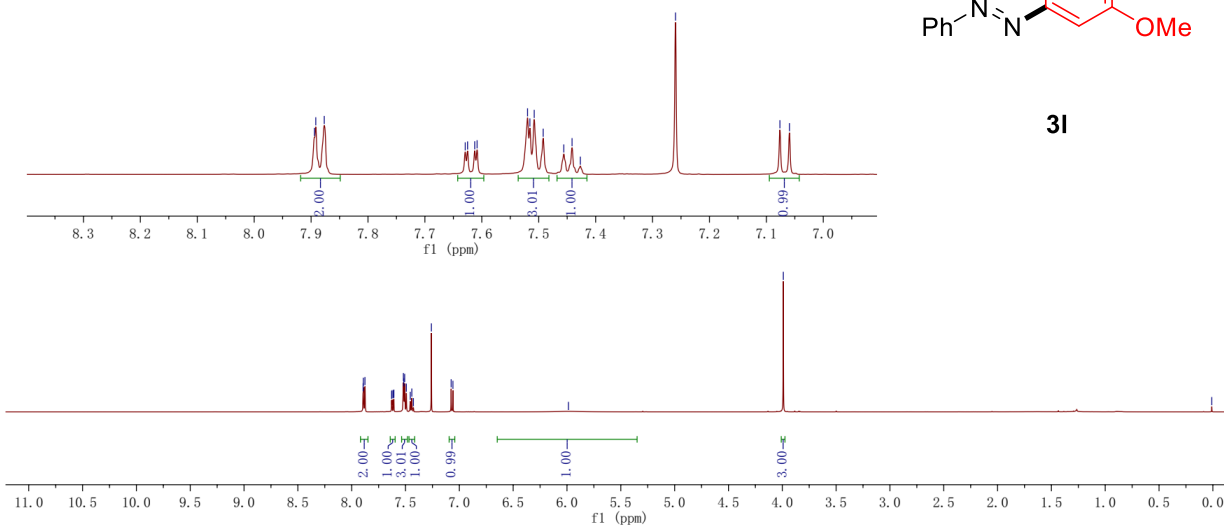

20230322-zy1-80-70

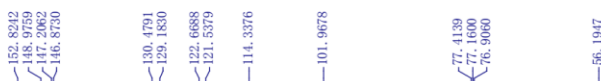

$^{13}\text{C}$  NMR (125 MHz,  $\text{CDCl}_3$ )

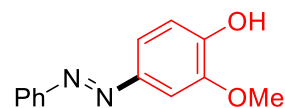

**31**

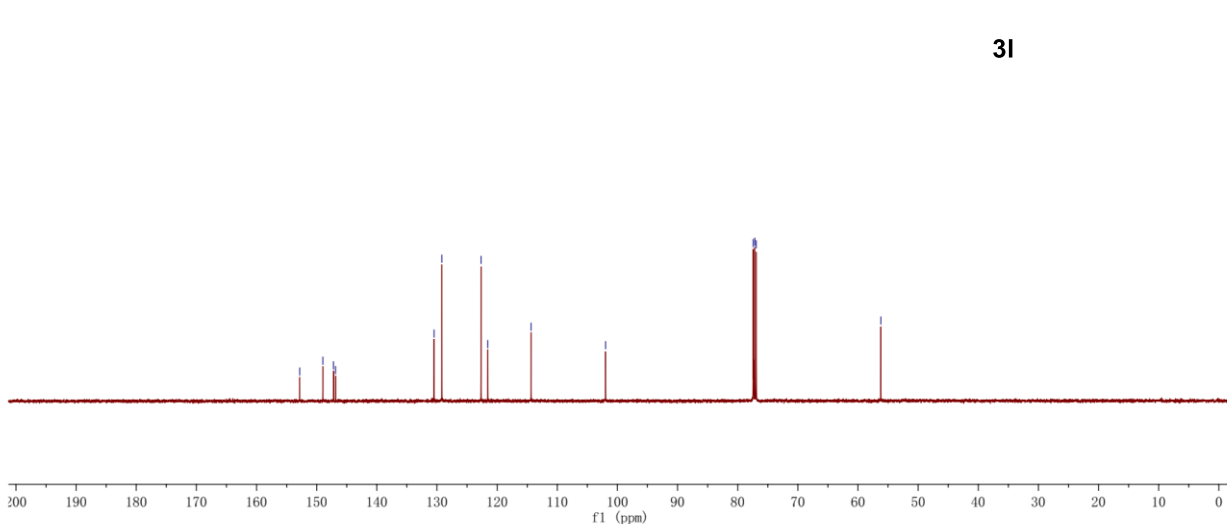

20230308-zy1-80-71

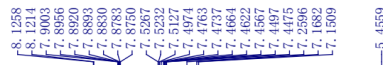

— 0.0110

20230308-zy1-80-71

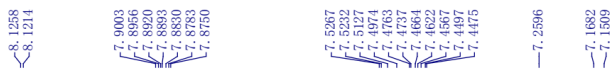

$^1\text{H}$  NMR (500 MHz,  $\text{CDCl}_3$ )

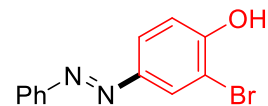

**3m**

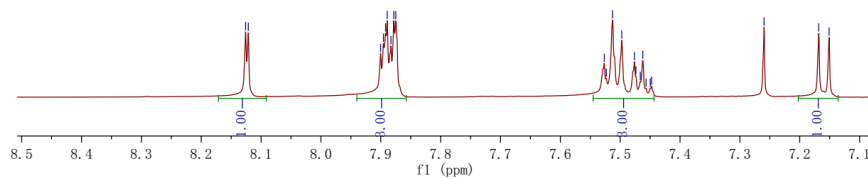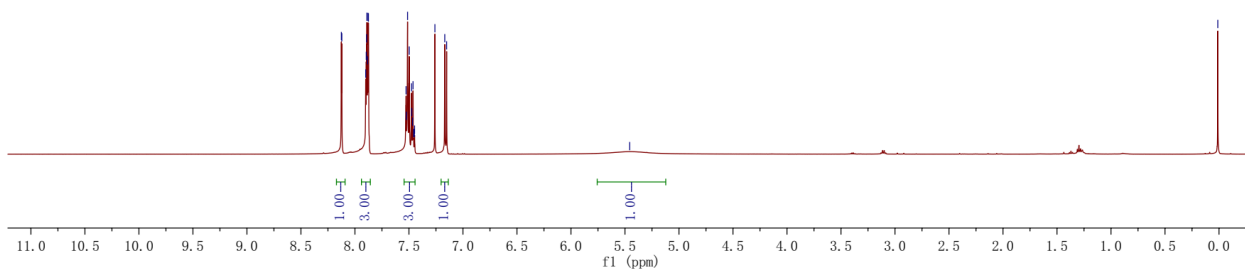

20230309-zy1-80-71

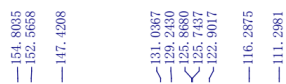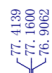

$^{13}\text{C}$  NMR (125 MHz,  $\text{CDCl}_3$ )

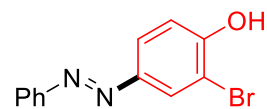

**3m**

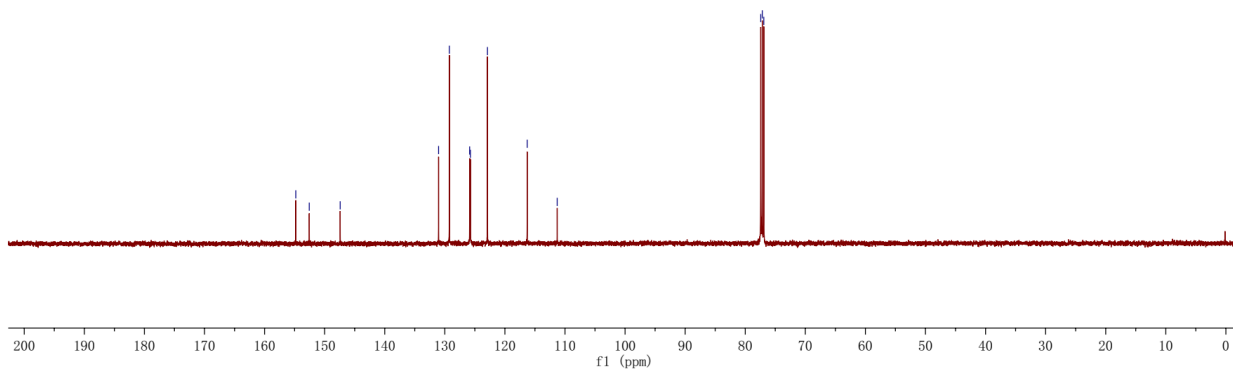

20230427-zy1-85-57

-12.4615

7.8812  
7.8785  
7.8641  
7.5427  
7.5403  
7.5387  
7.5226  
7.5110  
7.4940  
7.4916  
7.4845  
7.4800  
7.4653  
7.4527  
7.4473  
7.5296  
7.5110  
7.4940  
7.4916  
7.4845  
7.4800  
7.4653  
7.4527  
7.4473  
7.2596  
7.0089  
7.0034  
6.9909  
6.9853  
6.9755  
6.9616

-3.8730

-1.5807

-0.0080

20230427-zy1-85-57

7.8812  
7.8785  
7.8641

7.5427  
7.5403  
7.5387  
7.5226  
7.5110  
7.4940  
7.4916  
7.4845  
7.4800  
7.4653  
7.4527  
7.4473

-7.2596

7.0089  
7.0034  
6.9909  
6.9853  
6.9755  
6.9616

 $^1\text{H}$  NMR (500 MHz,  $\text{CDCl}_3$ )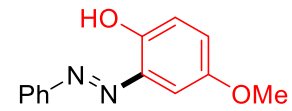**3n**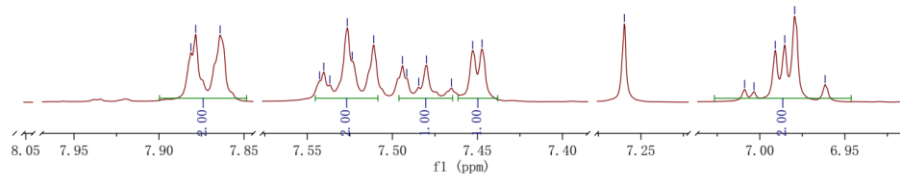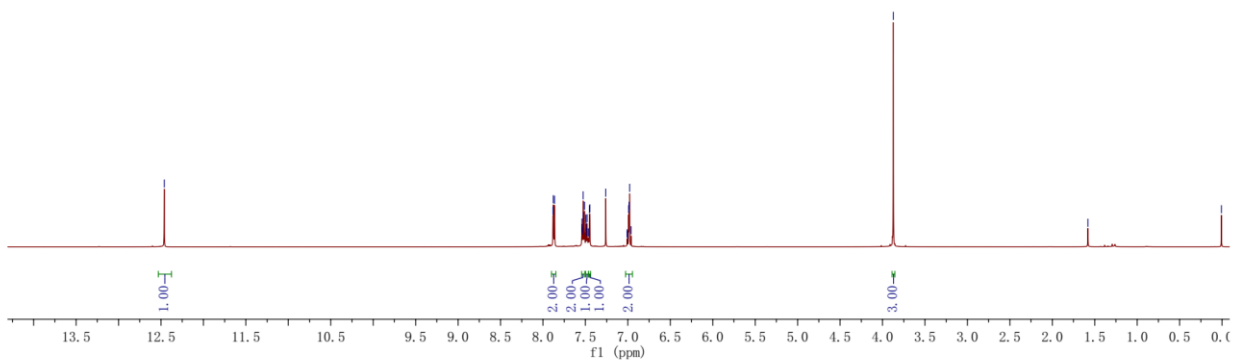

20230504-zy1-85-57

153.6493  
150.7521  
147.3487

137.0763

131.2876

129.3666

122.3604

121.7774

118.9686

114.8260

77.4144  
77.1605  
76.9063

56.0859

 $^{13}\text{C}$  NMR (125 MHz,  $\text{CDCl}_3$ )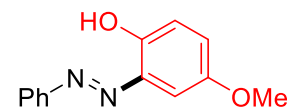**3n**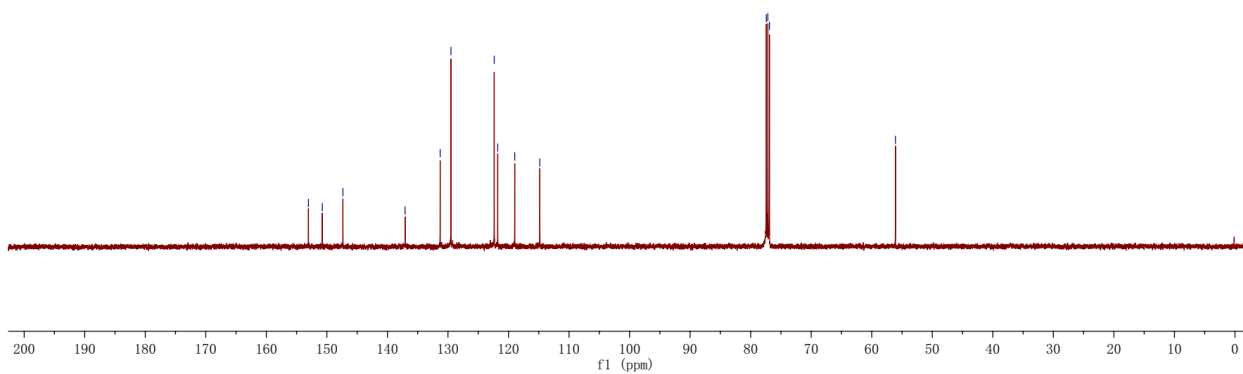

ZYL-80-122-H-20221121-ZYL

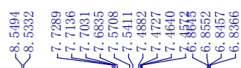

ZYL-80-122-H-20221121-ZYL

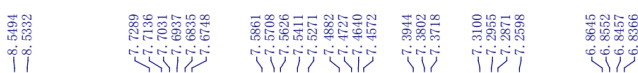

$^1\text{H}$  NMR (500 MHz,  $\text{CDCl}_3$ )

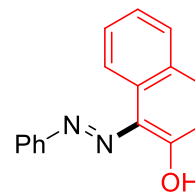

3o

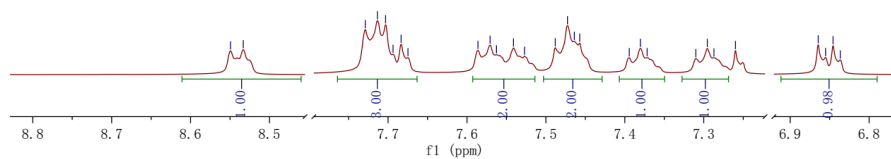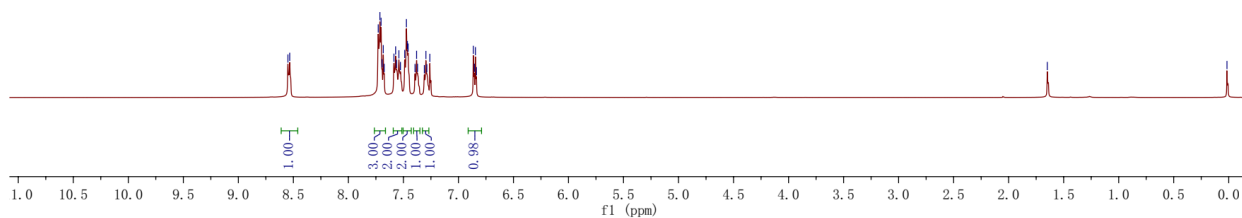

ZYL-80-122-C-20221130-ZYL

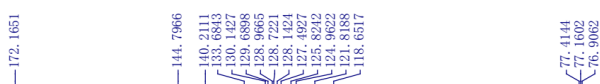

$^{13}\text{C}$  NMR (125 MHz,  $\text{CDCl}_3$ )

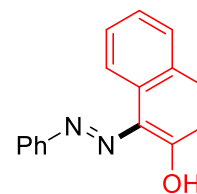

3o

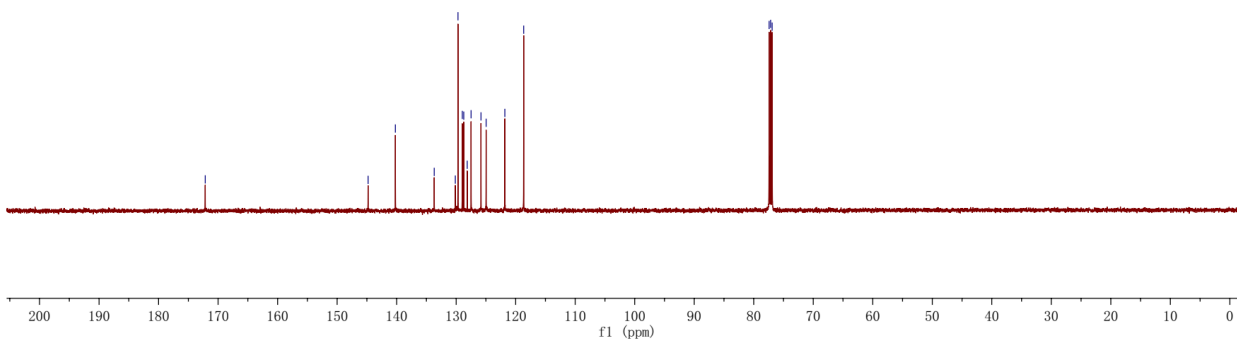



ZHZ-ZK-LS-1-H

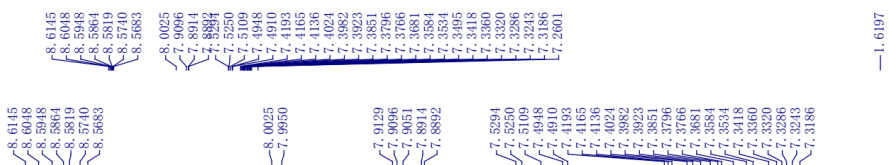

ZHZ-ZK-LS-1-H

<sup>1</sup>H NMR (400 MHz, CDCl<sub>3</sub>)

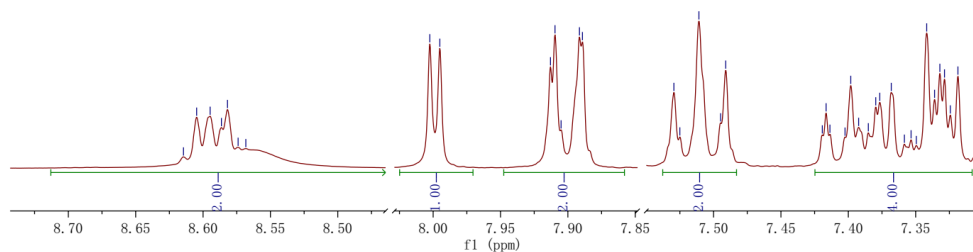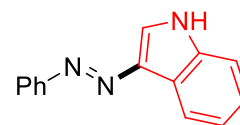

3p

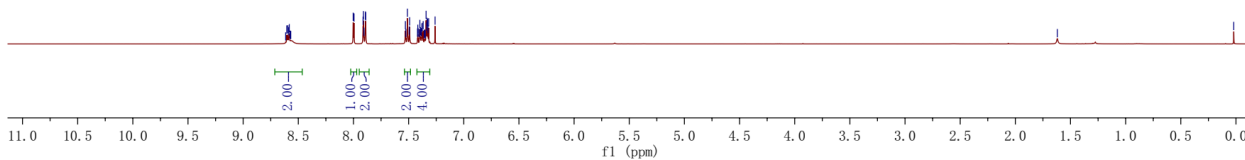

ZHZ-ZK-LS-1-C

<sup>13</sup>C NMR (100 MHz, CDCl<sub>3</sub>)

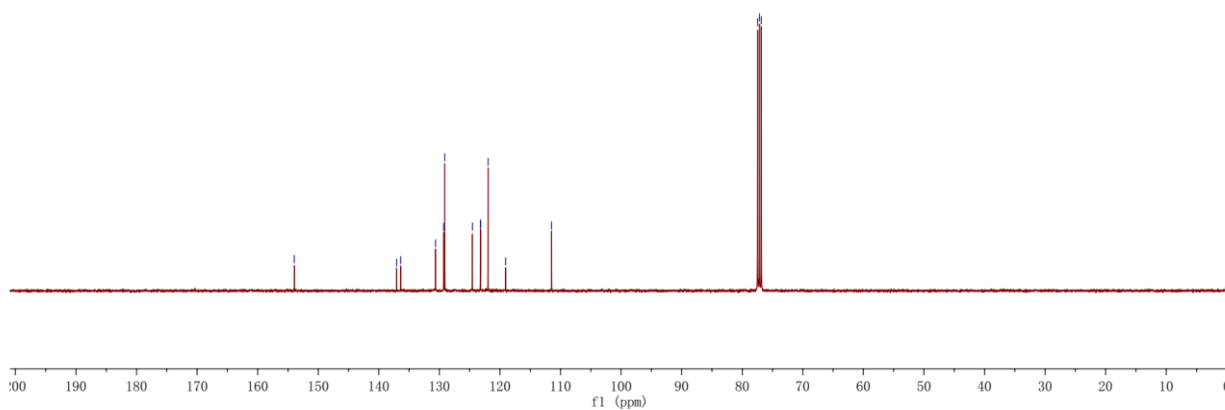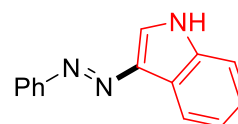

3p

LS-3

8.5583  
8.1042  
7.9567  
7.8748  
7.8551  
7.8351  
7.4909  
7.4715  
7.2453  
7.2443  
6.9627  
6.9468  
6.9407

3.9118

1.6373

0.0000

LS-3

8.1042  
8.1002

7.9567  
7.9543

7.8748  
7.8551

7.5007  
7.4999  
7.4715

7.3941  
7.3759  
7.3580

7.2617  
7.2453  
7.2403

6.9688  
6.9627  
6.9407

$^1\text{H NMR}$  (400 MHz,  $\text{CDCl}_3$ )

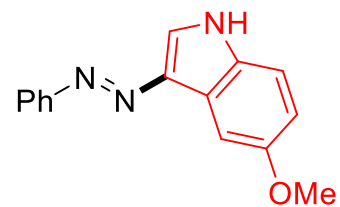

3q

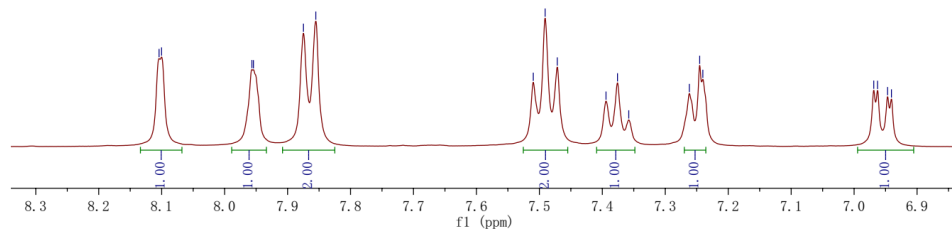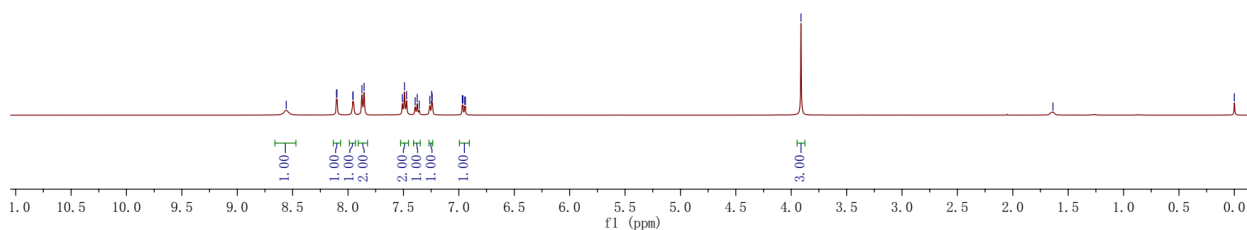

LS-3

156.7619  
153.9086

136.8301  
131.2766  
131.1640

129.1785  
129.1152

121.8803  
119.4619

114.3080  
112.2765

104.9276

77.4775  
77.1599  
76.8422

55.9445

$^{13}\text{C NMR}$  (100 MHz,  $\text{CDCl}_3$ )

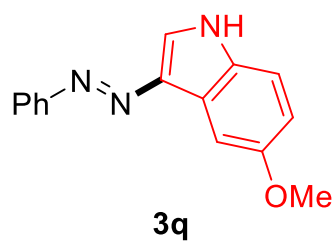

3q

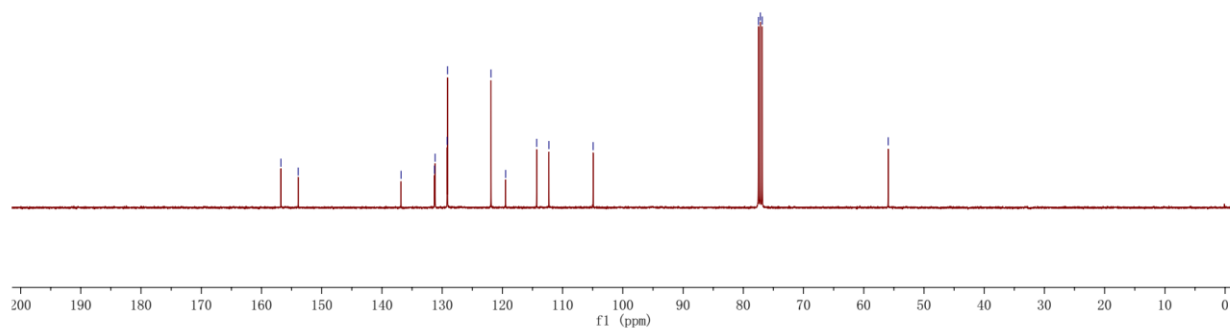

20230309-zy1-80-69

8.5319  
8.5167  
8.1197  
7.8799  
7.8641  
7.4722  
7.4570  
7.4428  
7.3281  
7.3139  
7.2600  
7.2547  
7.2444  
7.2329  
7.2287  
7.2130

2.7375

0.0100

20230309-zy1-80-69

8.5319  
8.5167

8.1197

7.8799  
7.8641

7.4722  
7.4570  
7.4418

7.3428  
7.3281  
7.3139  
7.2600  
7.2547  
7.2444  
7.2329  
7.2287  
7.2130

$^1\text{H NMR}$  (500 MHz,  $\text{CDCl}_3$ )

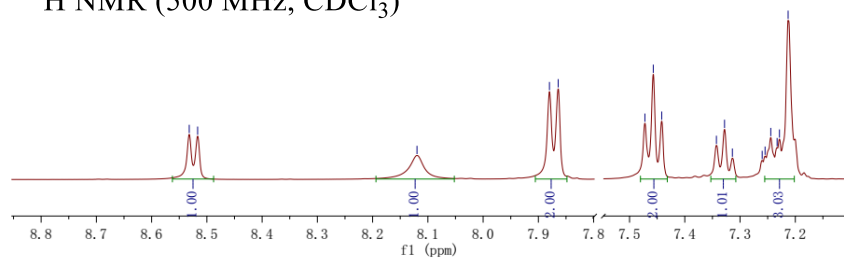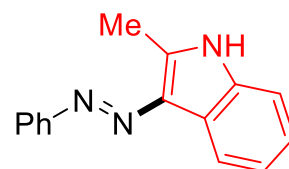

**3r**

20230310-zy1-80-69

154.3387

142.9769

135.1314  
132.9621  
132.0155  
123.6427  
122.9759  
122.5847  
121.8426  
119.7234  
110.6463

77.4141  
77.1602  
76.9061

11.6242

$^{13}\text{C NMR}$  (125 MHz,  $\text{CDCl}_3$ )

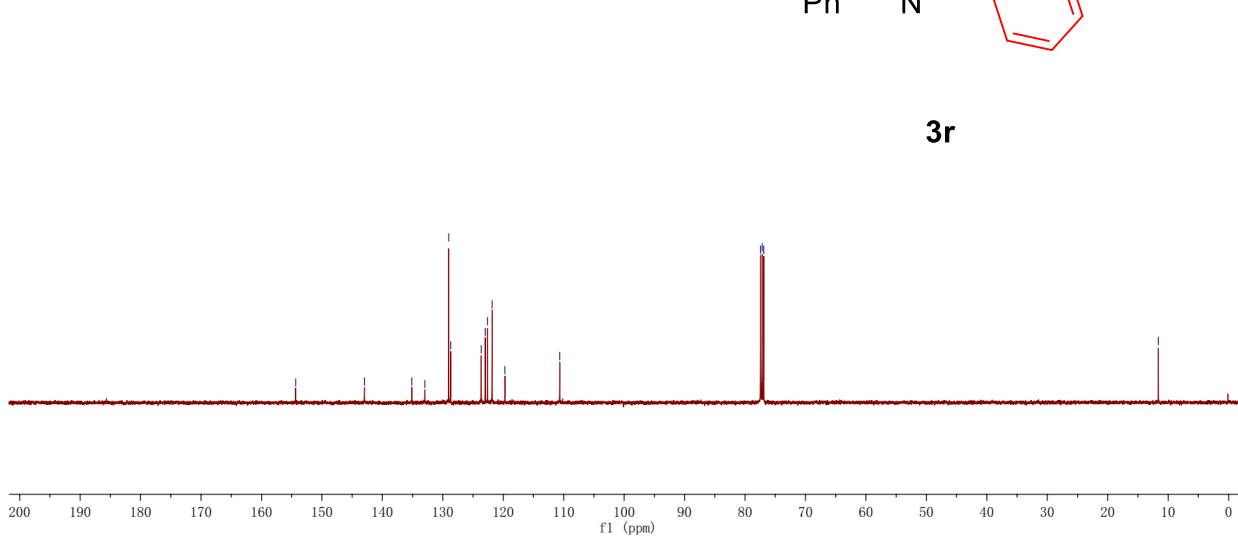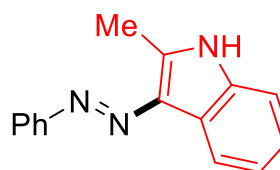

**3r**

20230323-zy1-80-77

8.4948  
8.4460  
8.4301  
8.0048  
7.9119  
7.9096  
7.8949  
7.8814  
7.8685  
7.8522  
7.8367  
7.8146  
7.7988  
7.7834  
7.7680  
7.7522  
7.7367  
7.7213  
7.1313

2.5077

0.0230

20230323-zy1-80-77

8.4948  
8.4460  
8.4301  
8.0048  
7.9119  
7.9096  
7.8949  
7.8814  
7.8685  
7.8522  
7.8367  
7.8146  
7.7988  
7.7834  
7.7680  
7.7522  
7.7367  
7.7213  
7.1313

$^1\text{H}$  NMR (500 MHz,  $\text{CDCl}_3$ )

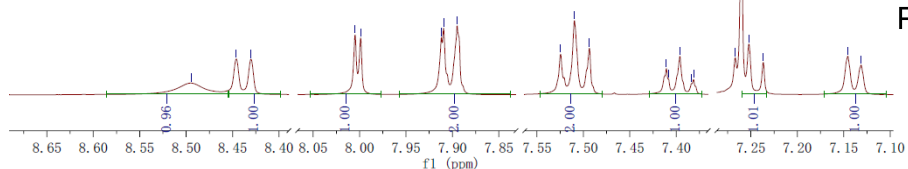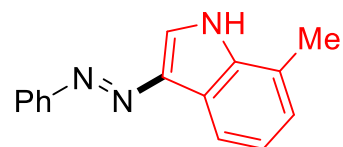

**3s**

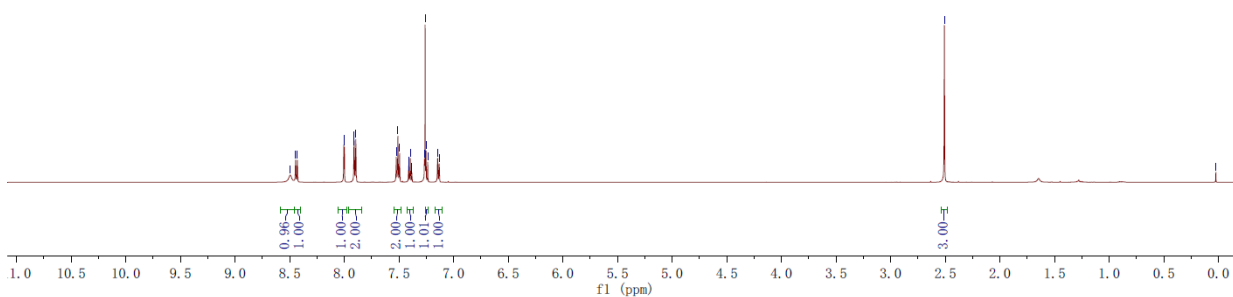

20230324-zy1-80-77

153.9421  
137.4322  
133.8696  
130.3378  
129.7569  
129.0904  
128.1554  
123.3091  
121.9695  
120.8966  
120.4615  
118.6312

77.4144  
77.1603  
76.9063

16.4627

$^{13}\text{C}$  NMR (125 MHz,  $\text{CDCl}_3$ )

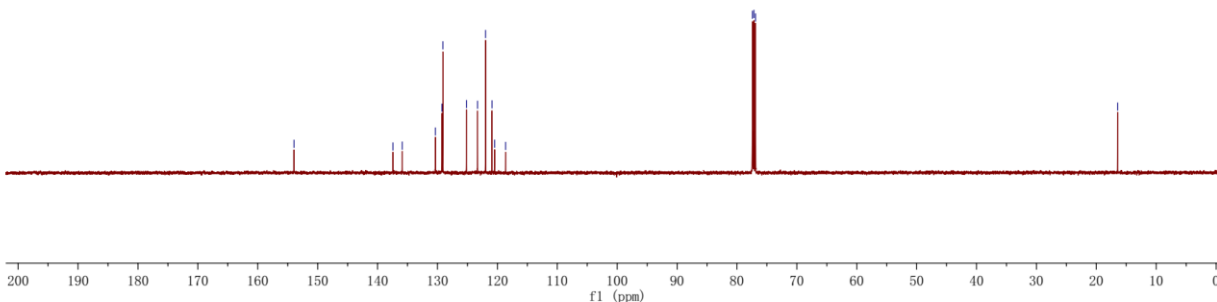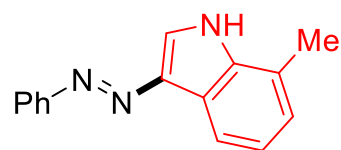

**3s**

LS-4

8.6225  
8.5690  
8.0000  
7.9626  
7.8868  
7.5329  
7.5142  
7.4946  
7.4309  
7.4127  
7.3945  
7.2742  
7.2598

-1.7066

-0.0160

LS-4

8.6225  
8.5690  
8.0000  
7.9226  
7.9056  
7.8868  
7.5329  
7.5142  
7.4946  
7.4309  
7.4127  
7.3945  
7.2742  
7.2598

 $^1\text{H}$  NMR (400 MHz,  $\text{CDCl}_3$ )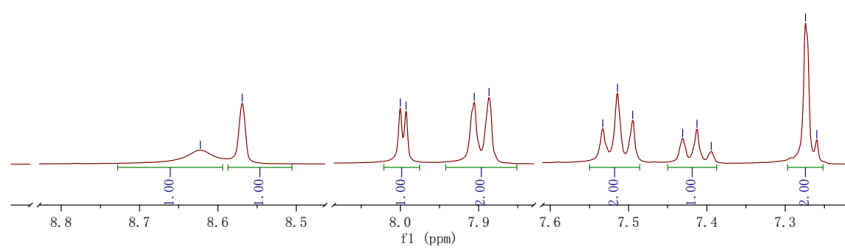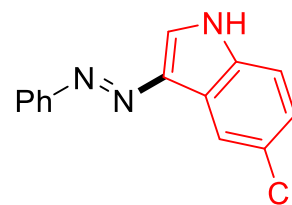**3t**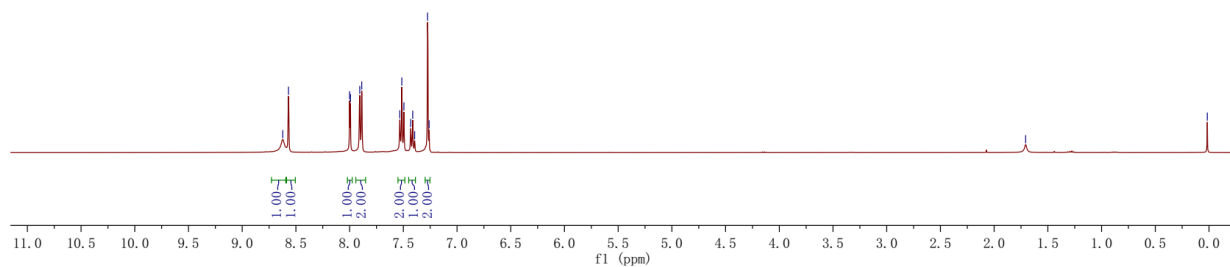

LS-4

153.6576  
136.2595  
134.6256  
131.6252  
129.1595  
128.7648  
124.7946  
122.7219  
122.0401  
119.8451  
112.4898

77.4772  
77.1597  
76.8422

 $^{13}\text{C}$  NMR (100 MHz,  $\text{CDCl}_3$ )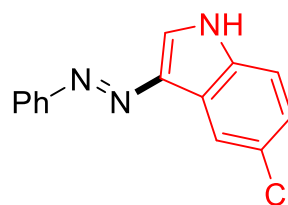**3t**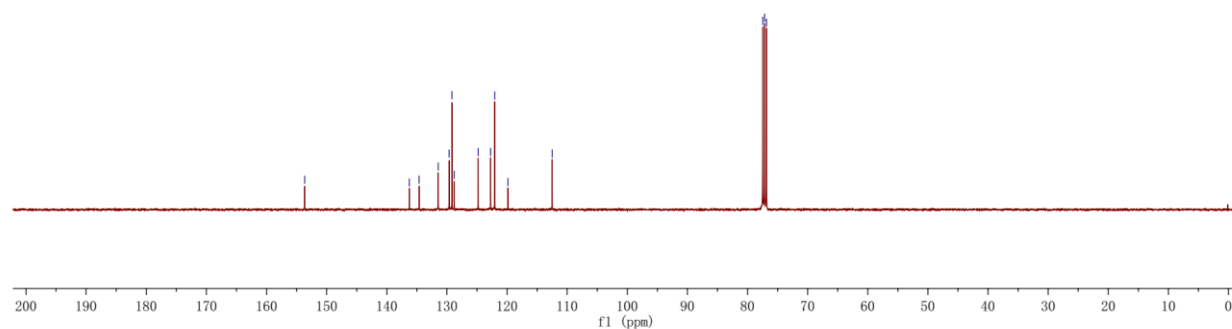

20230323-zy1-80-68

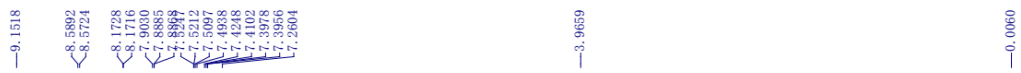

20230323-zy1-80-68

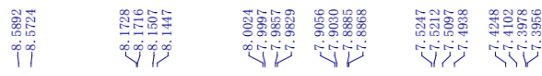

<sup>1</sup>H NMR (500 MHz, CDCl<sub>3</sub>)

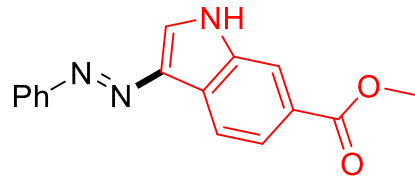

**3u**

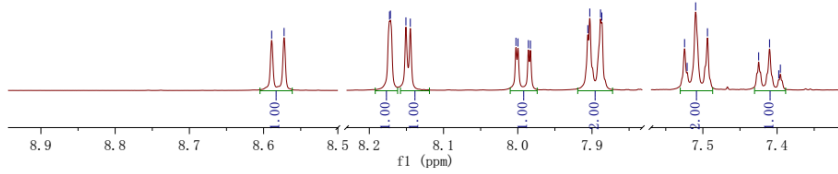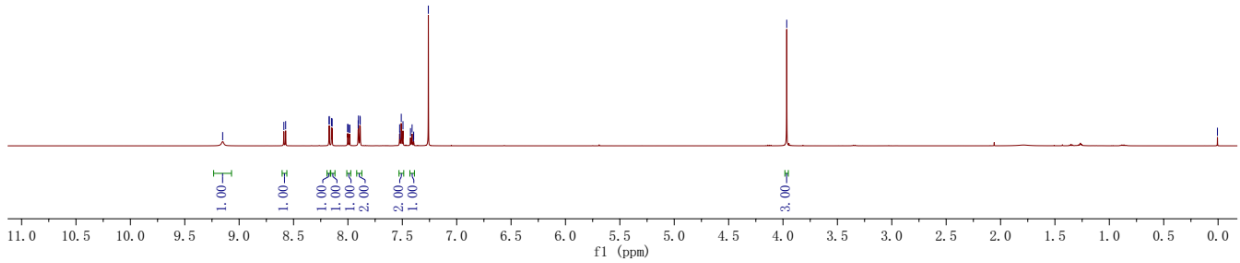

20230324-zy1-80-68

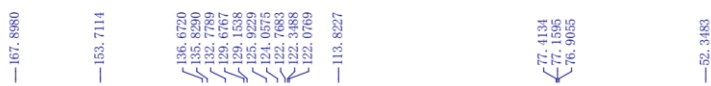

<sup>13</sup>C NMR (125 MHz, CDCl<sub>3</sub>)

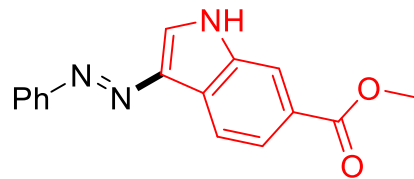

**3u**

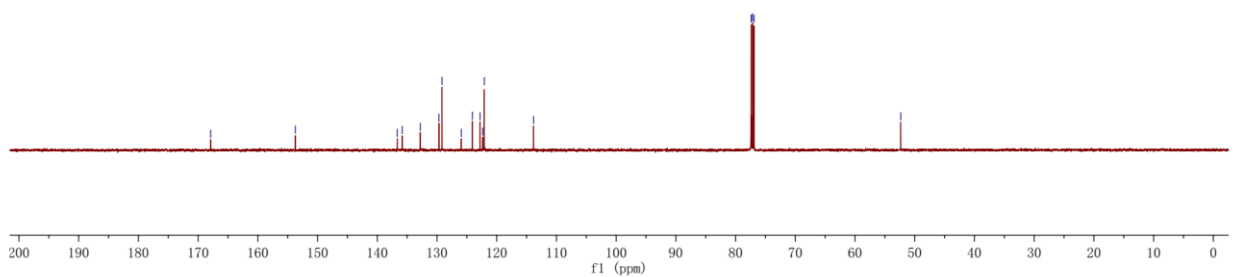

2023011-zy1-85-33

12.6738

9.2155  
9.2109  
8.6452  
8.6452  
8.1753  
8.1705  
8.1573  
8.1526  
7.8491  
7.8466  
7.8320  
7.8320  
7.6960  
7.6961  
7.5782  
7.5667  
7.5508  
7.4832  
7.4886  
7.4688  
7.4510

3.3343  
2.5037  
2.5001  
2.4966

2023011-zy1-85-33

9.2155  
9.2109

8.6452

8.1753  
8.1705  
8.1573  
8.1526

7.8491  
7.8466  
7.8320

7.6960  
7.6781

7.5816  
7.5782  
7.5667  
7.5508

7.4832  
7.4886  
7.4510

$^1\text{H NMR}$  (500 MHz,  $\text{DMSO-}d_6$ )

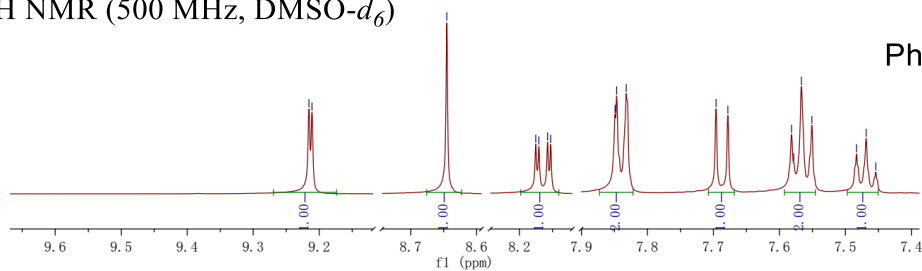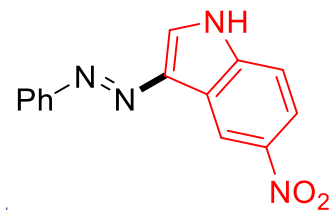

3v

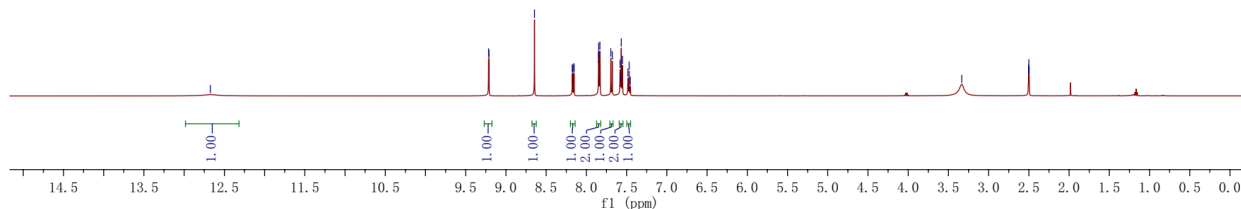

20230515-zy1-85-33

152.8213

143.0630  
138.5424  
136.4334  
135.8945

129.7478  
128.3217

121.5560  
119.0664  
117.2925  
113.0422

40.0208  
39.8541  
39.6871  
39.5201  
39.3531  
39.1862  
39.0192

$^{13}\text{C NMR}$  (125 MHz,  $\text{DMSO-}d_6$ )

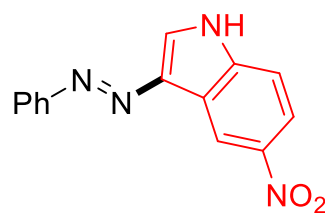

3v

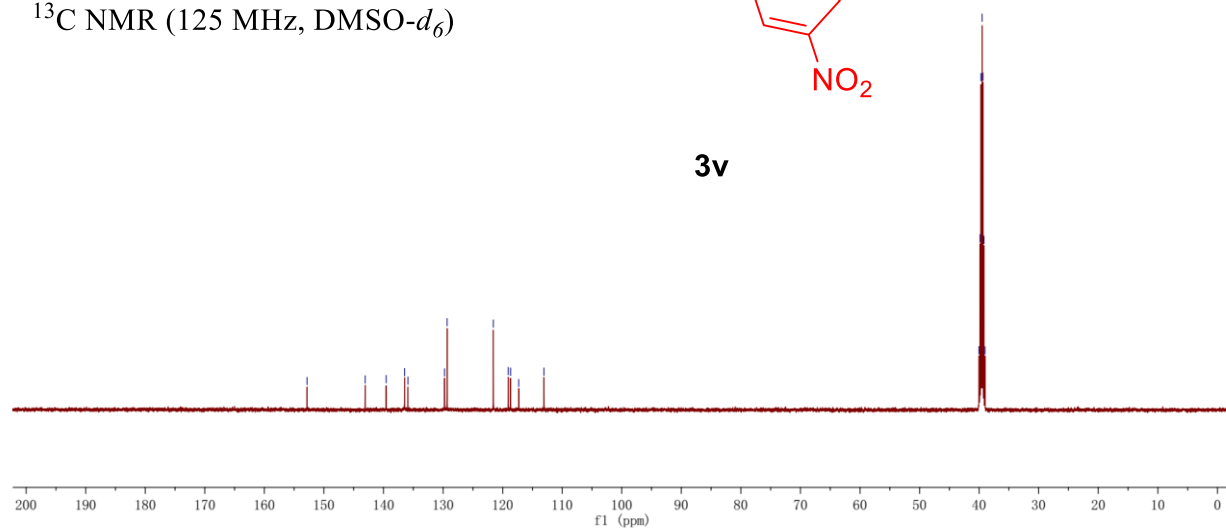

20230407-85-34

12.5581

8.7776  
8.5927  
7.8865  
7.8712  
7.6875  
7.6596  
7.6574  
7.6427  
7.6404  
7.5565  
7.5415  
7.5298  
7.4585  
7.4295  
7.4226

3.3556

2.4995

0.0220

20230407-85-34

7.8865  
7.8712

7.6875  
7.6707  
7.6596  
7.6574  
7.6427  
7.6404  
7.5565  
7.5415  
7.5298  
7.4585  
7.4295  
7.4226

 $^1\text{H}$  NMR (500 MHz,  $\text{DMSO-}d_6$ )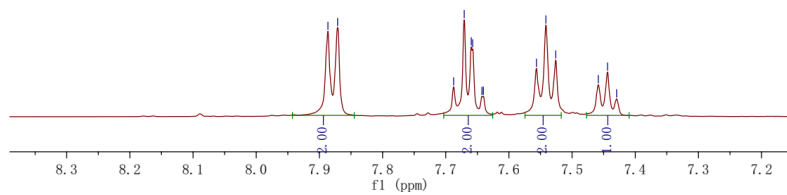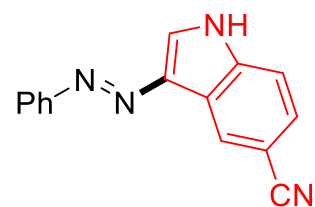**3w**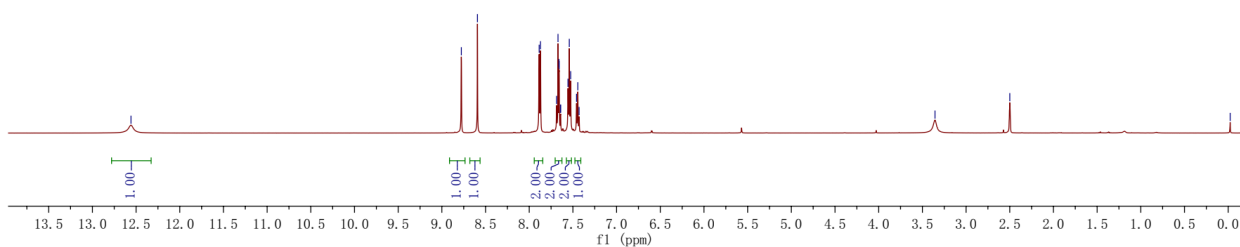

20230411-zyl-85-34

152.8701

138.2385  
135.3799  
134.9411  
128.5712  
128.1917  
127.2844  
126.6890  
121.5975  
120.1542  
117.7724  
113.7188  
104.5900

40.0203  
39.8539  
39.6870  
39.5200  
39.3532  
39.1862  
39.0194

 $^{13}\text{C}$  NMR (125 MHz,  $\text{DMSO-}d_6$ )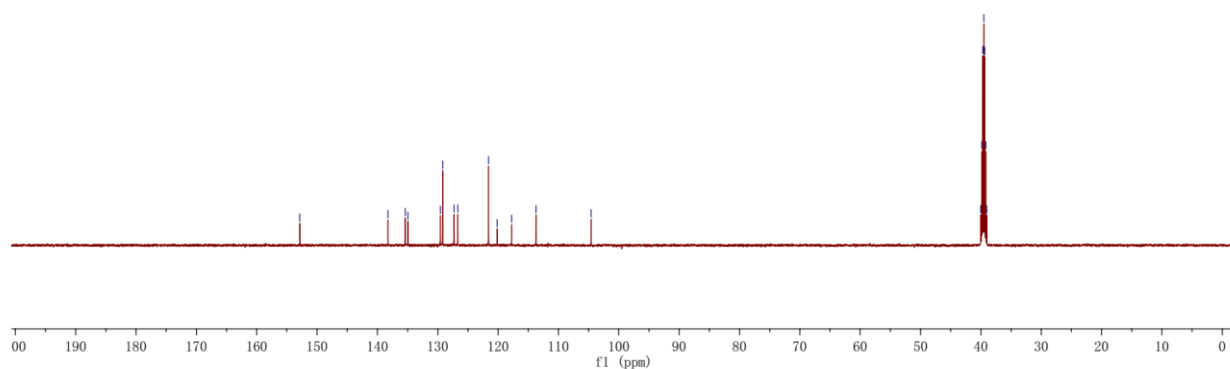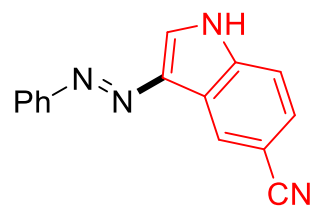**3w**



20230703-zy1-92-5

-9.2655

7.7589  
7.7409

-7.2604

6.8375  
6.8283  
6.7519  
6.7339  
6.7159

-3.0565

20230703-zy1-92-5

-9.2655

7.7589  
7.7409

-7.2604

6.8441  
6.8375  
6.8283  
6.7519  
6.73396.3425  
6.3371 $^1\text{H}$  NMR (500 MHz,  $\text{CDCl}_3$ )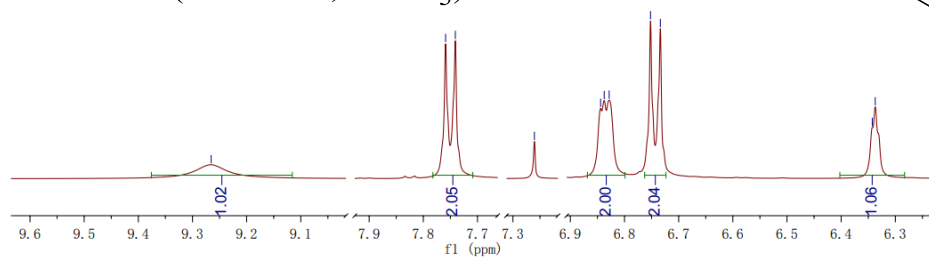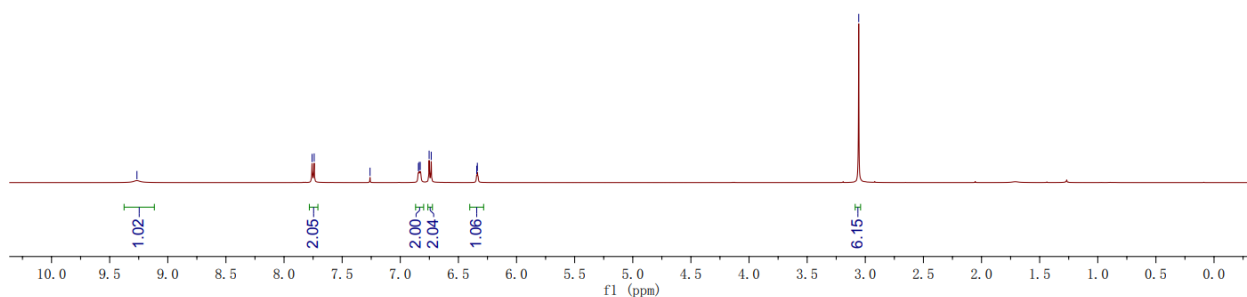

20230704-zy1-92-5

151.6399  
146.2074  
143.5030-123.9751  
-119.8850112.0824  
111.9189  
110.953477.4142  
77.1602  
76.9061

-40.4872

 $^{13}\text{C}$  NMR (125 MHz,  $\text{CDCl}_3$ )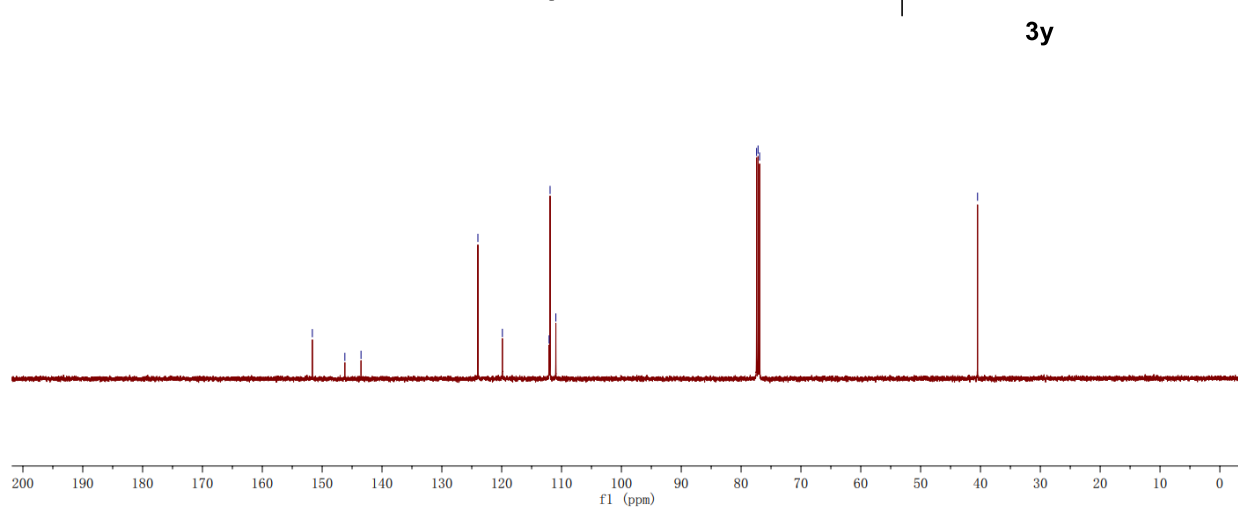

20230522-zy1-85-101

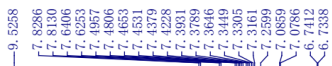

20230522-zy1-85-101

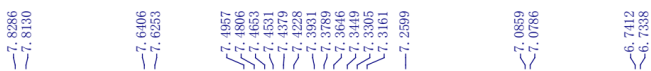

$^1\text{H}$  NMR (500 MHz,  $\text{CDCl}_3$ )

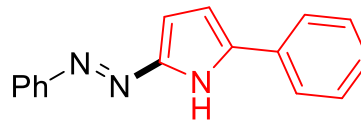

**3z**

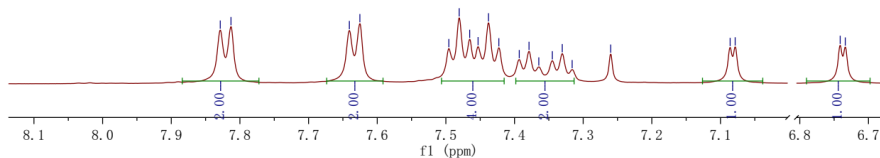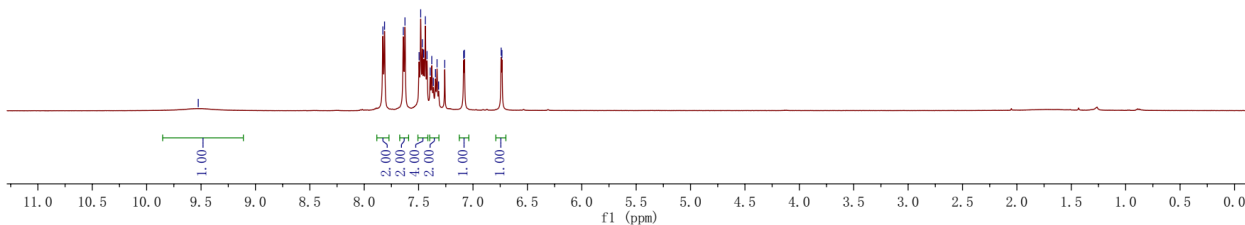

20230523-zy1-85-101

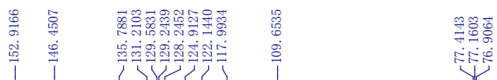

$^{13}\text{C}$  NMR (125 MHz,  $\text{CDCl}_3$ )

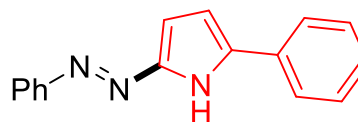

**3z**

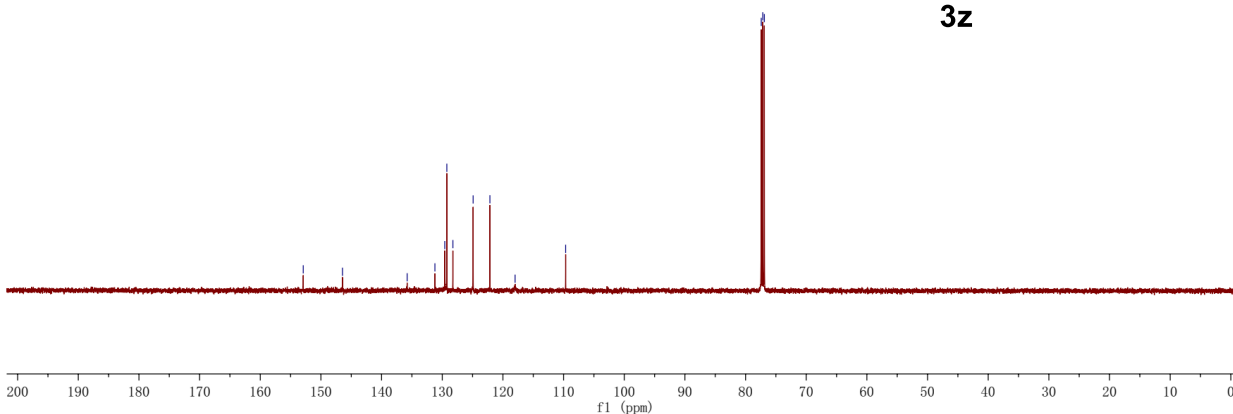

20230522-zy1-85-105

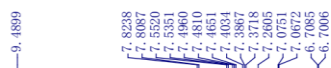

20230522-zy1-85-105

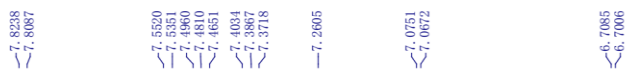

$^1\text{H}$  NMR (500 MHz,  $\text{CDCl}_3$ )

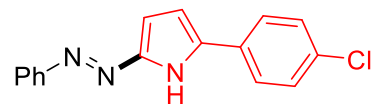

3aa

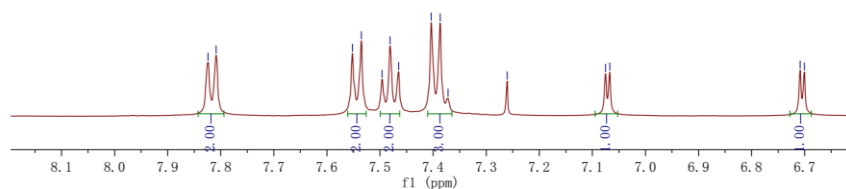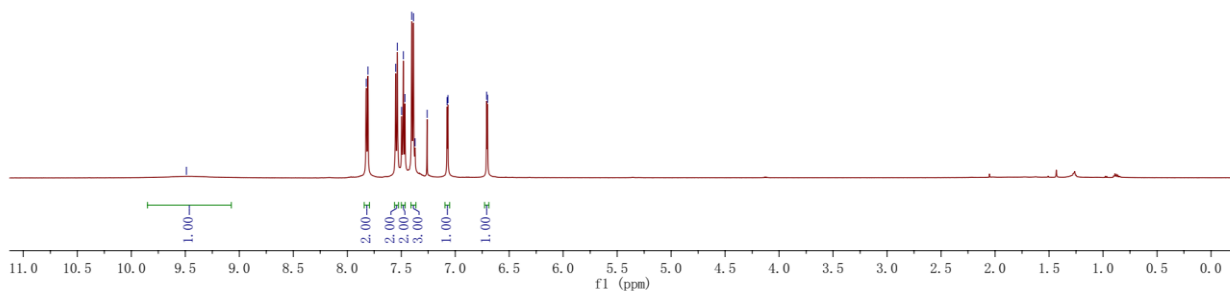

20230523-zy1-85-105

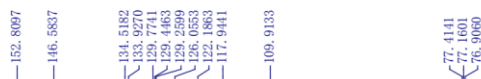

$^{13}\text{C}$  NMR (125 MHz,  $\text{CDCl}_3$ )

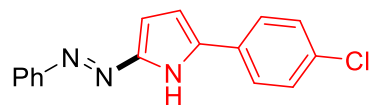

3aa

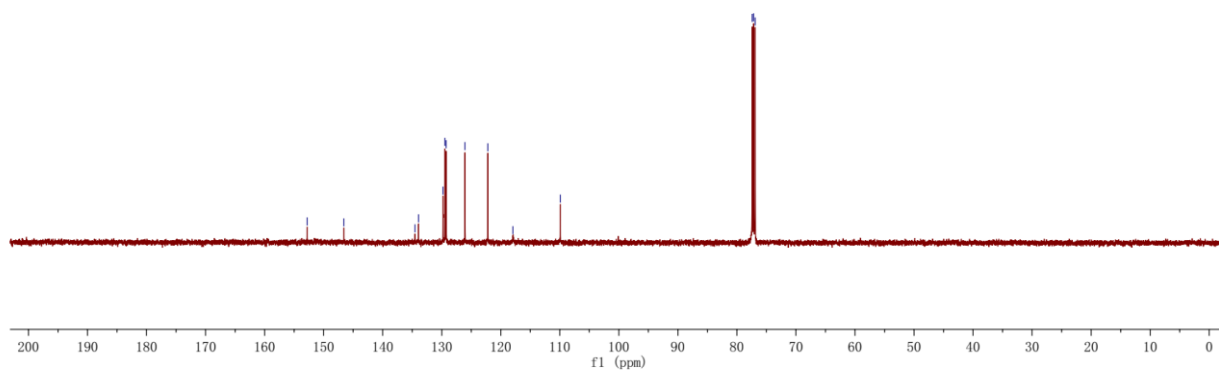

20230627-zy1-86-50-2

15.4076

8.1340  
8.1187  
7.6791  
7.6694  
7.4517  
7.4372  
7.4260  
7.4156  
7.3449  
7.3335  
7.3304  
7.3261  
7.3227  
7.3194  
7.3156  
7.2984  
7.2744  
7.2608

20230627-zy1-86-50-2

8.1340  
8.1315  
8.1187

7.6791  
7.6694

7.4517  
7.4372  
7.4260  
7.4156

7.3449  
7.3335  
7.3304  
7.3261  
7.3227  
7.3194  
7.3156  
7.2984  
7.2744  
7.2608

### $^1\text{H}$ NMR (500 MHz, $\text{CDCl}_3$ )

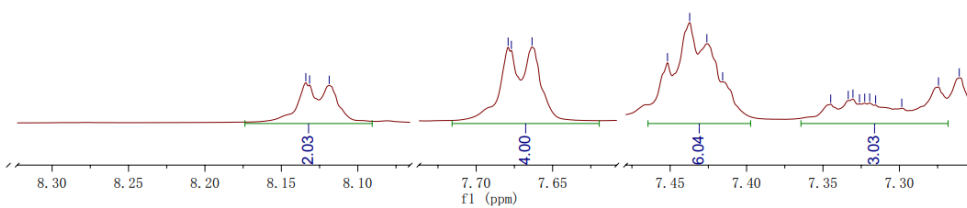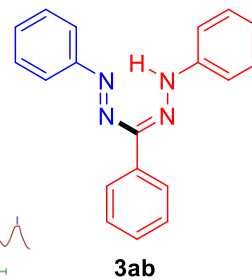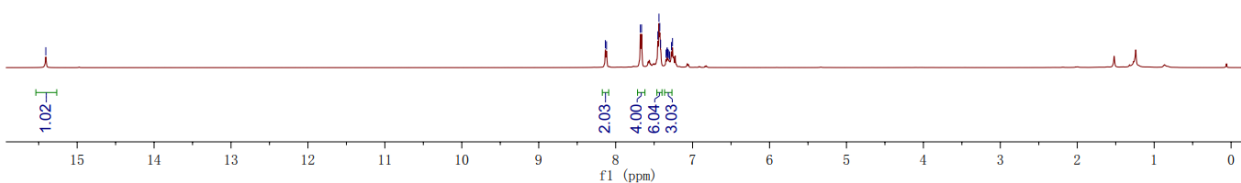

20230629-zy1-86-50-2

148.0426

141.2817

137.5699

129.5621

128.5408

127.6233

126.9851

118.9356

77.4142

77.1601

76.9061

20230629-zy1-86-50-2

148.0426

141.2817

137.5699

129.8153

129.5621

128.5408

128.3147

127.7807

127.6233

126.6135

125.9851

120.1920

118.9356

### $^{13}\text{C}$ NMR (125 MHz, $\text{CDCl}_3$ )

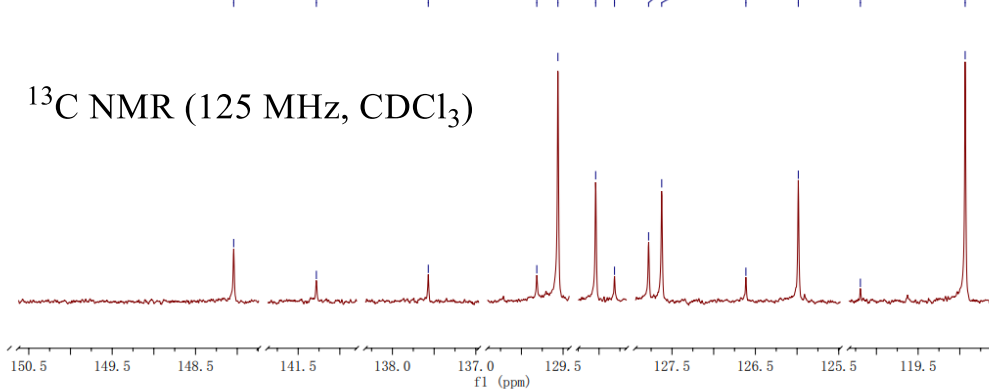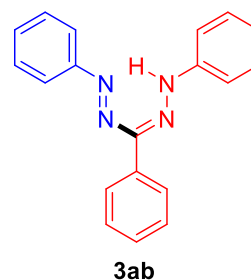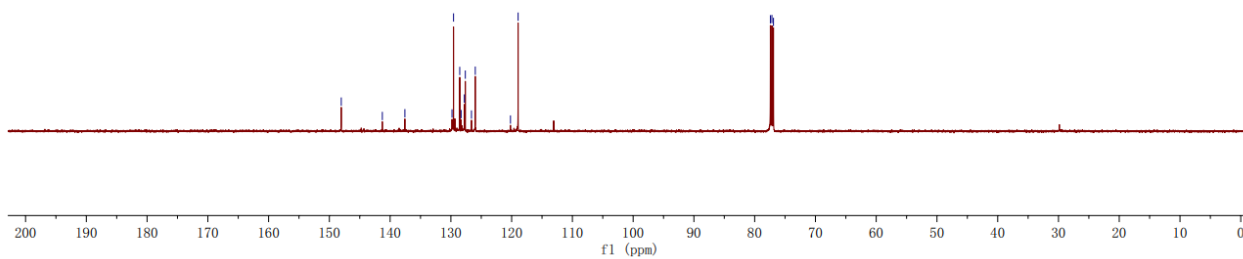

20230630-zy1-86-56

15.4506

8.0750  
8.0578  
7.6742  
7.6591  
7.4800  
7.4650  
7.4486  
7.4023  
7.3850  
7.3125  
7.2978  
7.2831  
7.2597

1.5540

20230630-zy1-86-56

8.0750  
8.0578

7.6742  
7.6591

7.4800  
7.4650  
7.4486  
7.4023  
7.3850  
7.3125  
7.2978  
7.2831  
7.2597

<sup>1</sup>H NMR (500 MHz, CDCl<sub>3</sub>)

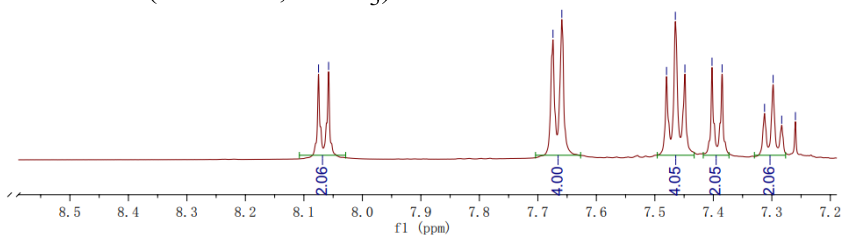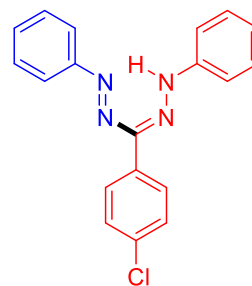

**3ac**

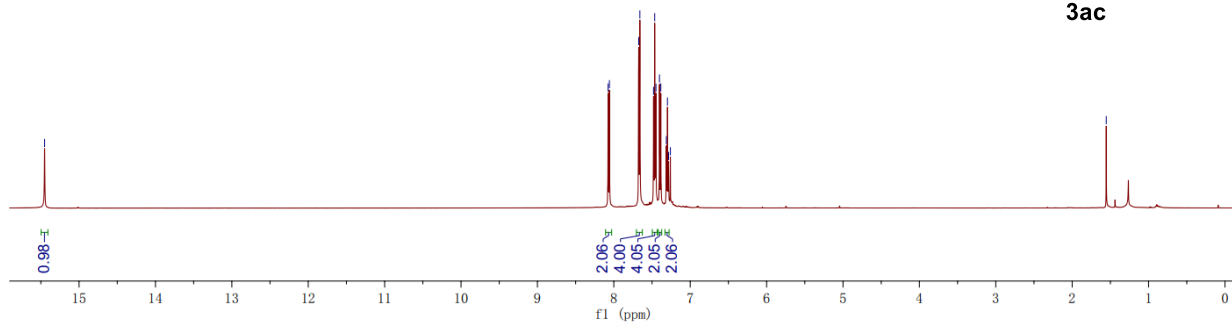

20230703-zy1-86-56

147.8496  
140.3560  
136.1209  
133.6031  
129.5971  
128.6514  
127.8234  
127.1724

118.9576

77.4135  
77.1596  
76.9055

<sup>13</sup>C NMR (125 MHz, CDCl<sub>3</sub>)

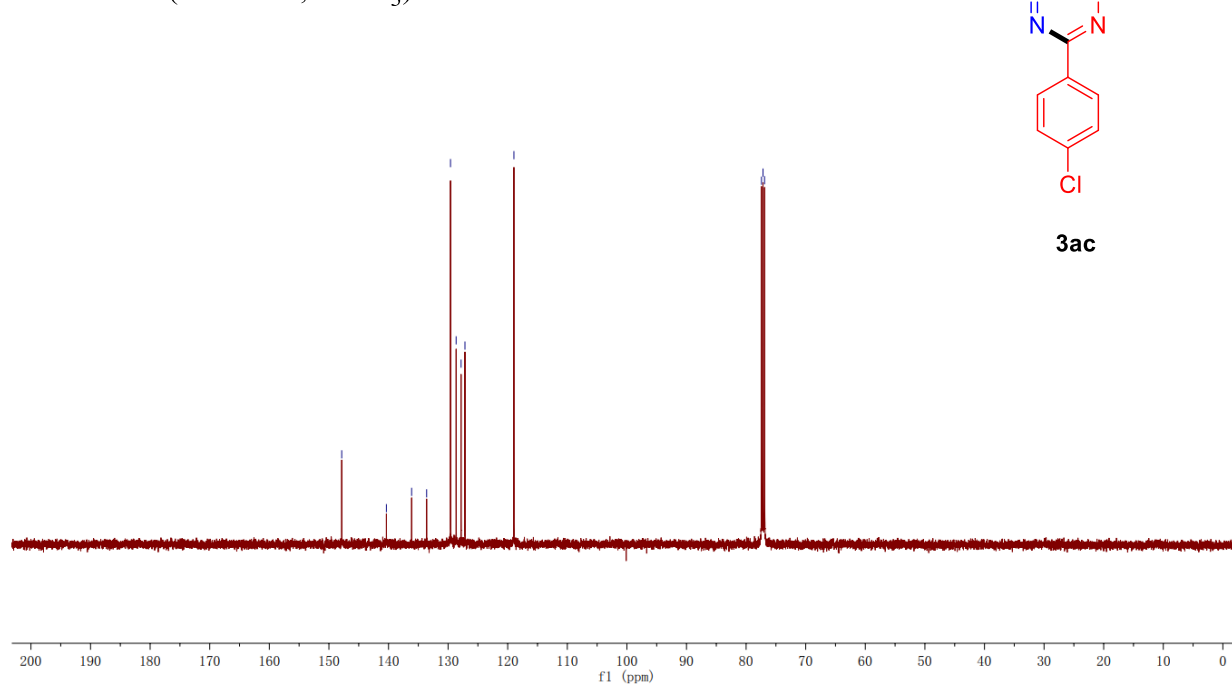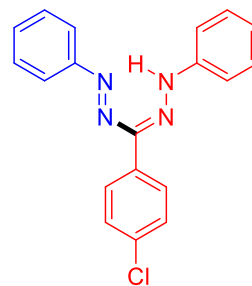

**3ac**

20230629-zy1-86-53

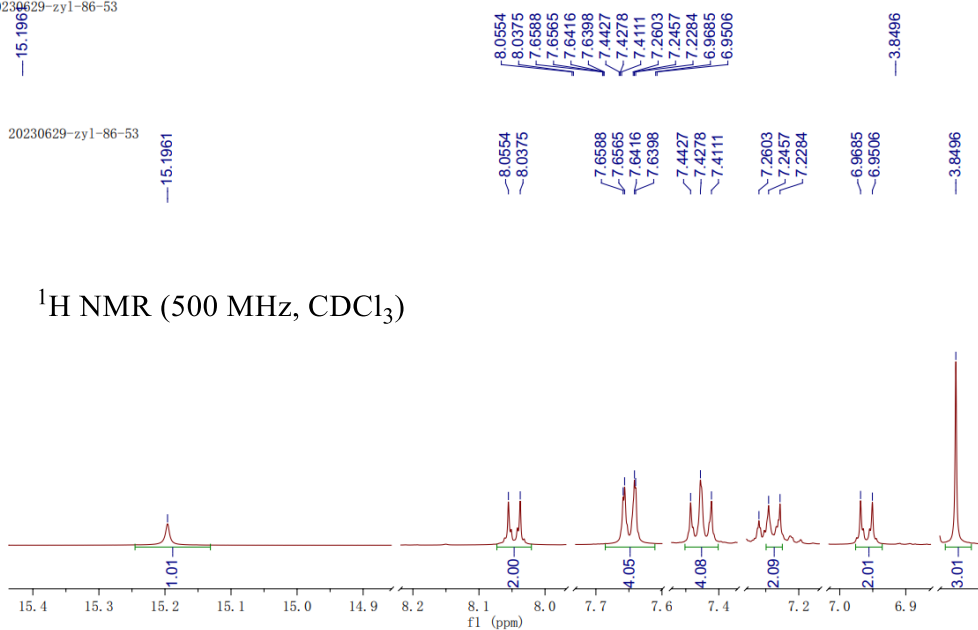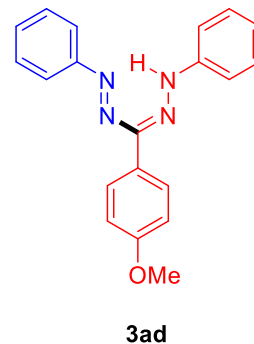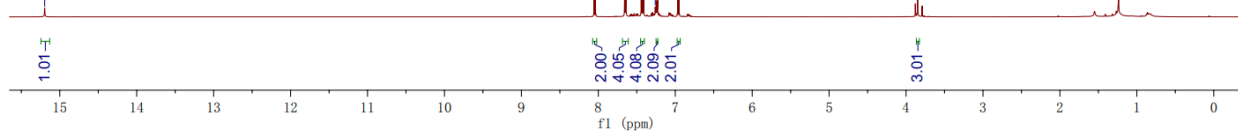

<sup>13</sup>C NMR (125 MHz, CDCl<sub>3</sub>)

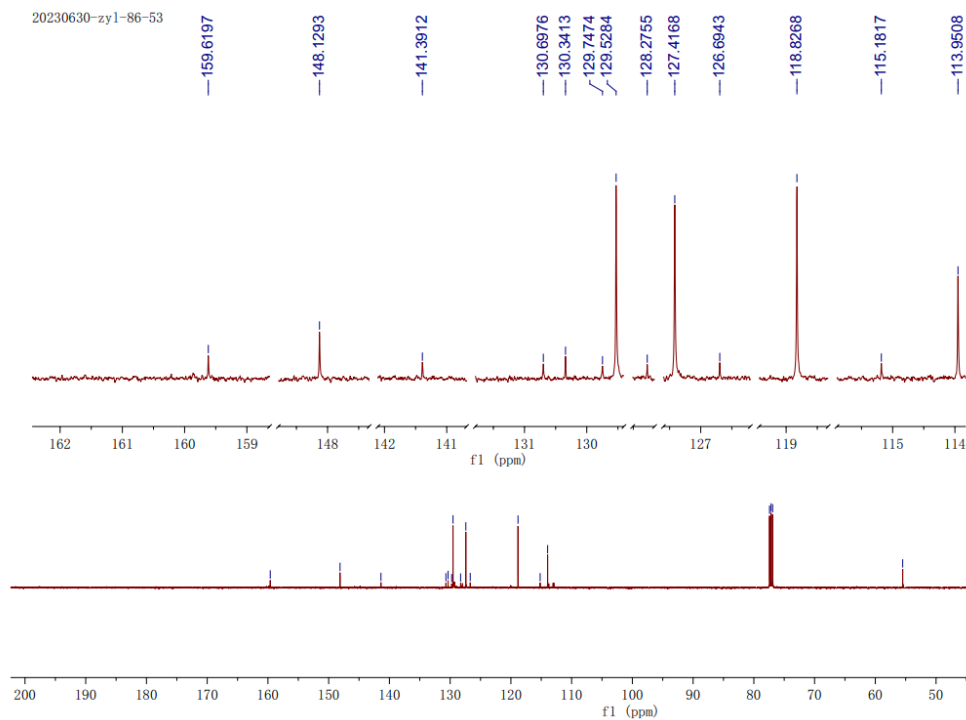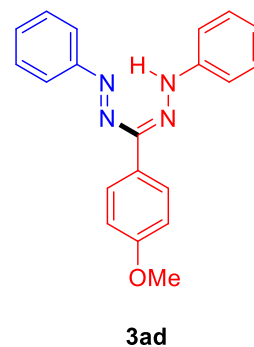

2023705-zy1-86-60

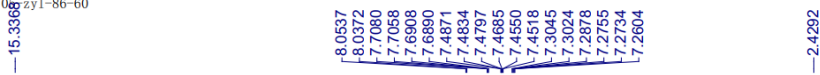

2023705-zy1-86-60

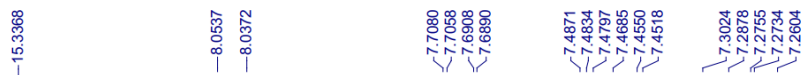

<sup>1</sup>H NMR (500 MHz, CDCl<sub>3</sub>)

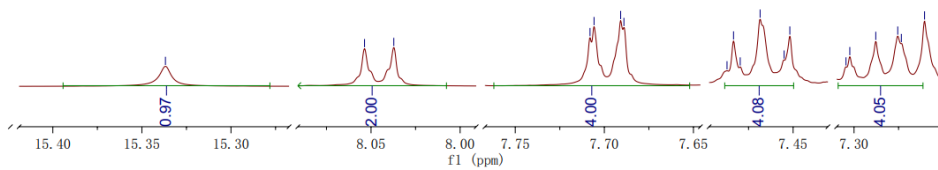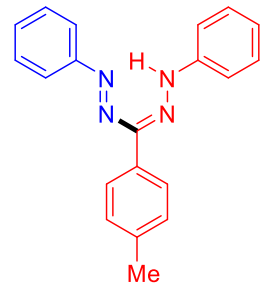

**3ae**

2023705-zy1-86-60

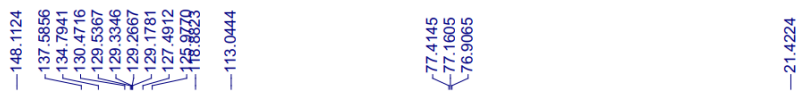

2023705-zy1-86-60

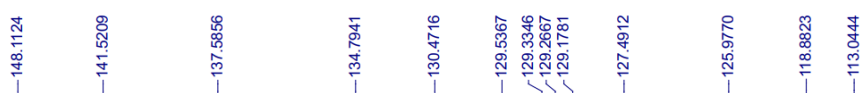

<sup>13</sup>C NMR (125 MHz, CDCl<sub>3</sub>)

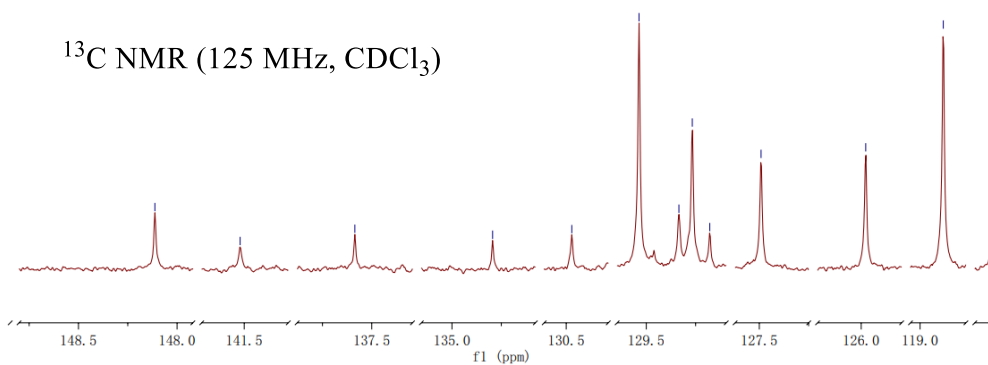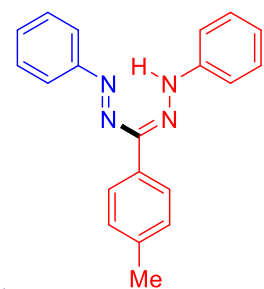

**3ae**

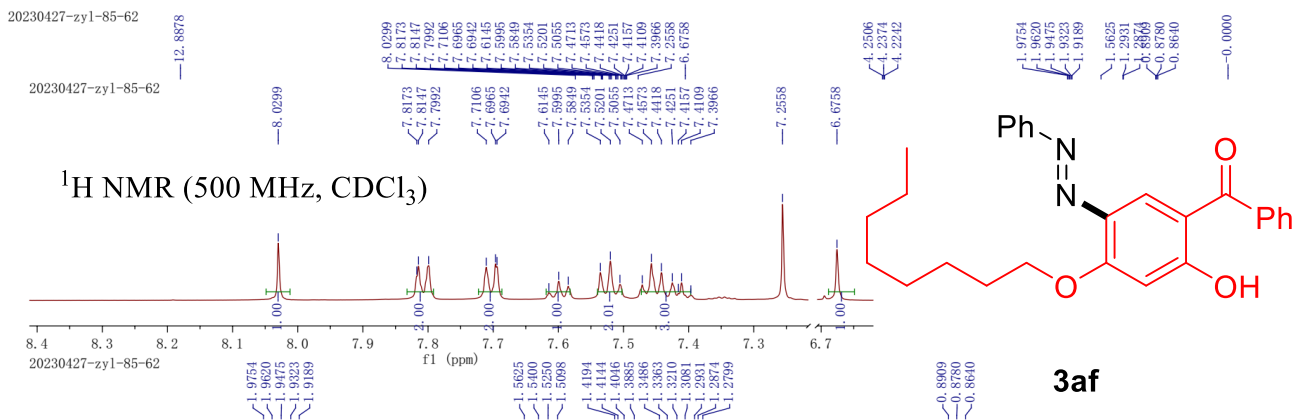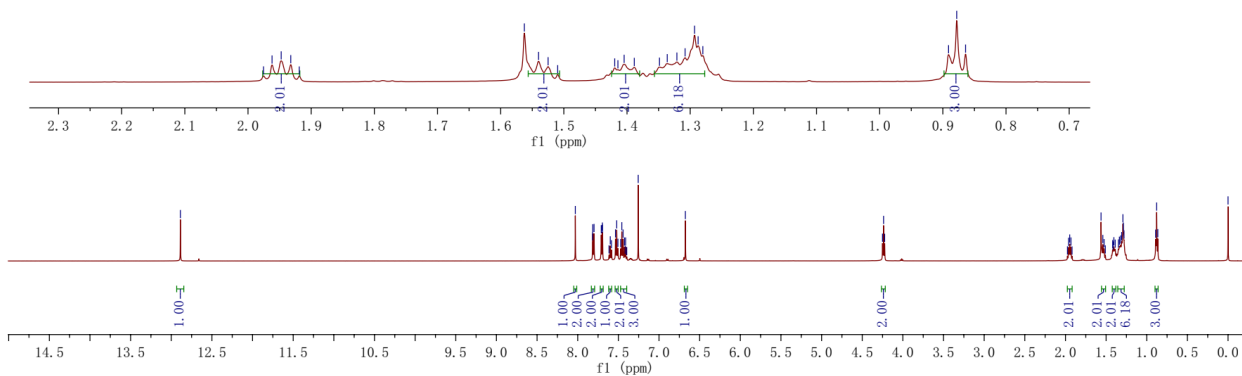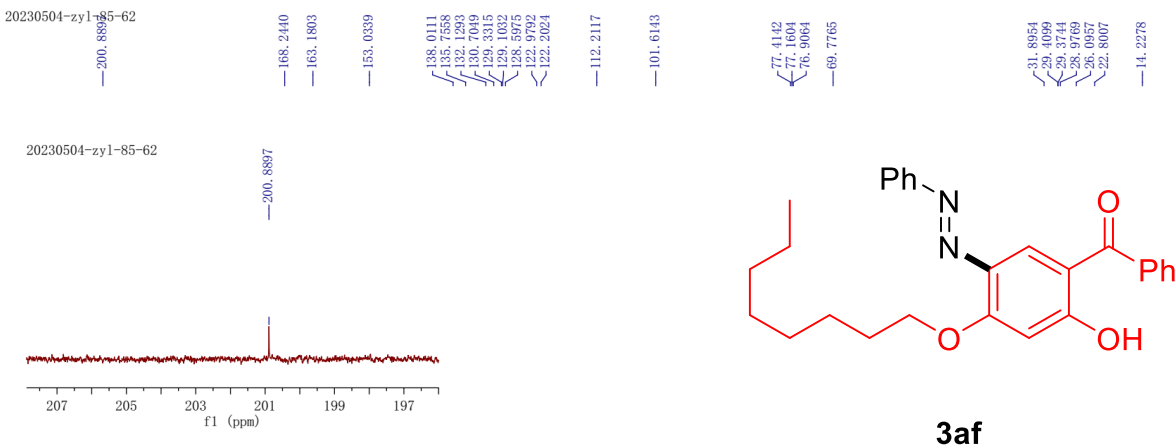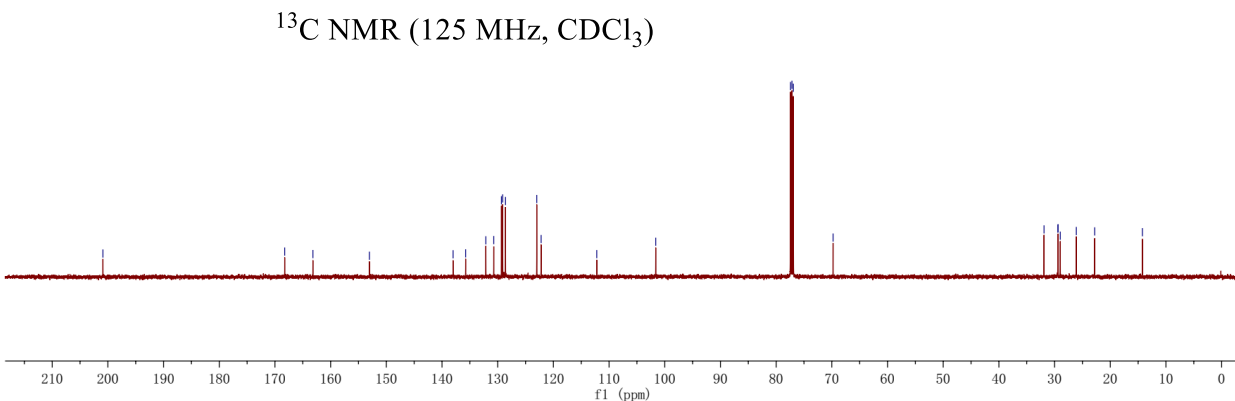



20230427-zyl-85-63

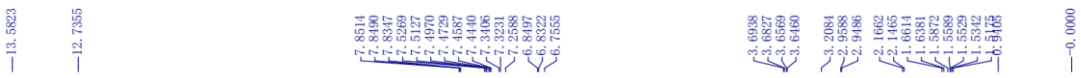

20230427-zyl-85-63

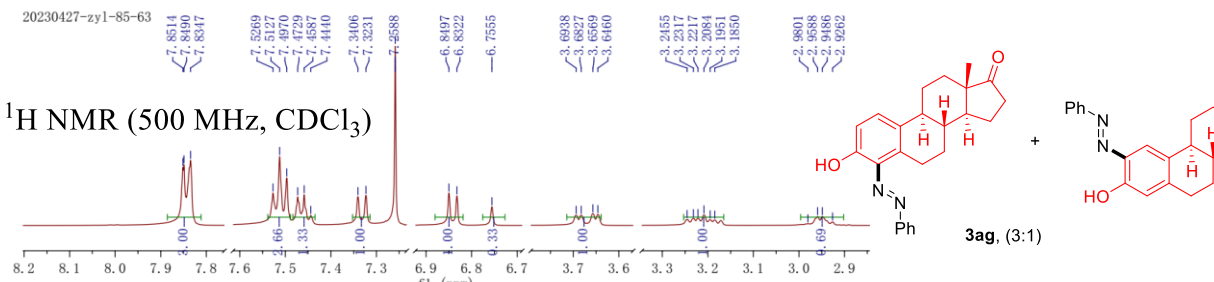 $^1\text{H NMR}$  (500 MHz,  $\text{CDCl}_3$ )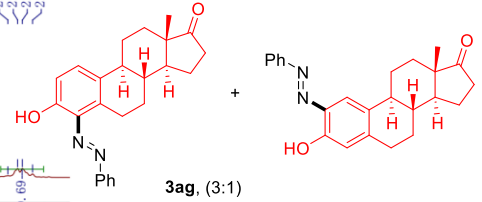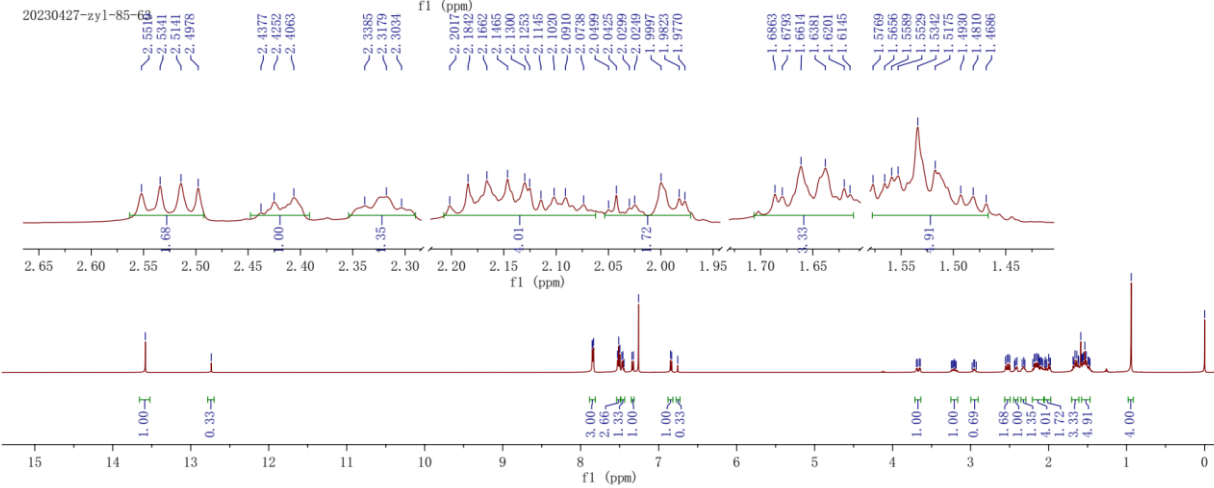

20230505-zyl-85-63

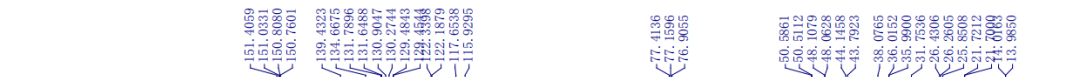

20230505-zyl-85-63

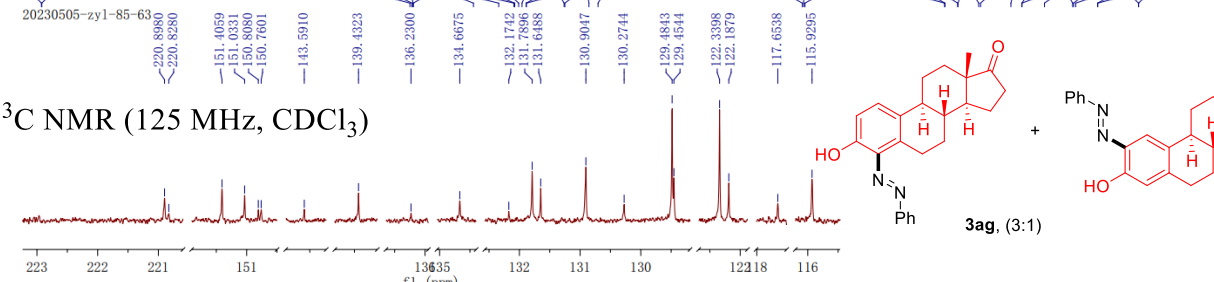 $^{13}\text{C NMR}$  (125 MHz,  $\text{CDCl}_3$ )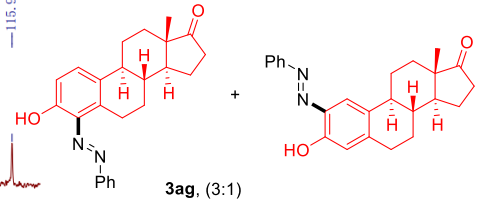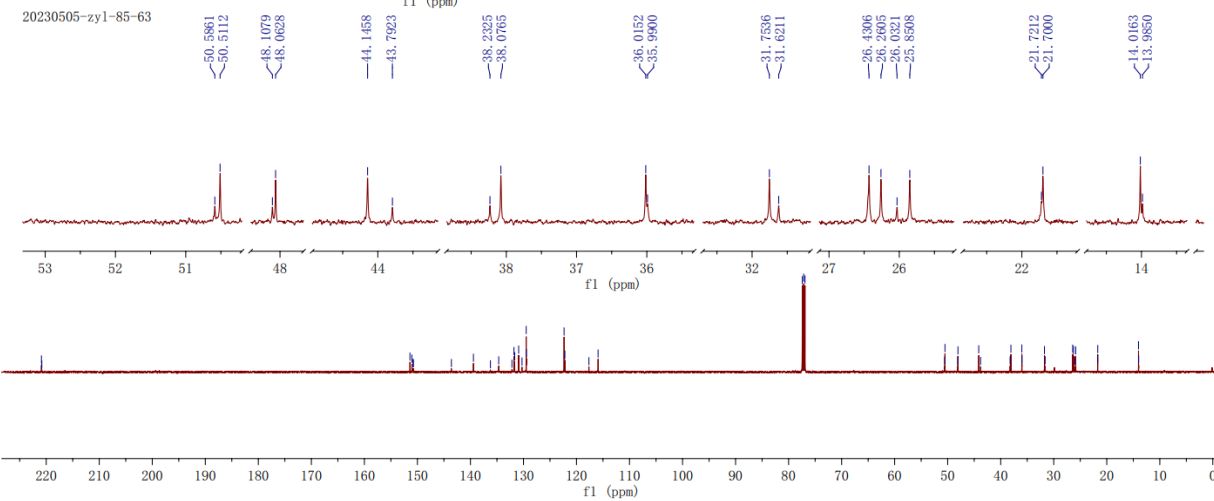

20220623-zy1-73-101

7.8256  
7.8102  
7.7853  
7.7454  
7.7344  
7.7276  
7.7274  
7.7252  
7.7189  
7.7189  
7.6716  
7.6699  
7.6564  
7.6418  
7.5235  
7.4436  
7.4400  
7.4332  
7.4295  
7.4280  
7.4110  
7.2899  
3.9599  
3.9249  
3.8887  
3.8572

20220623-zy1-73-101b

7.8256  
7.8102  
7.7454  
7.7383  
7.7344  
7.7276  
7.7274  
7.7252  
7.7189  
7.6716  
7.6699  
7.6564  
7.6418  
7.5389  
7.5235  
7.4436  
7.4400  
7.4332  
7.4295  
7.4110  
3.9599  
3.9249  
3.8887  
3.8572

$^1\text{H NMR}$  (500 MHz,  $\text{CDCl}_3$ )

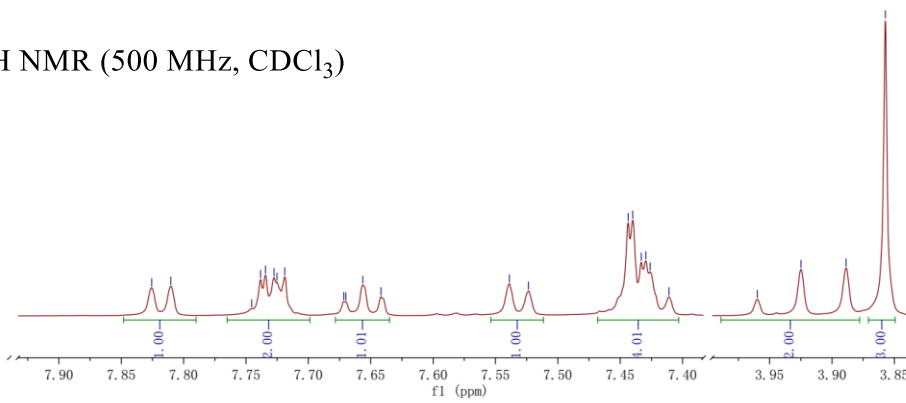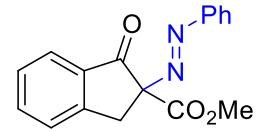

**5a**

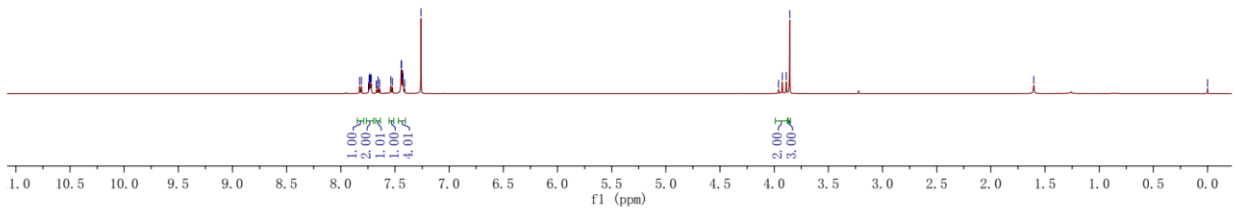

20230616-zy1-86-21

196.6181  
169.0359  
152.2697  
151.5358  
135.0992  
134.8526  
131.7578  
129.0859  
128.2729  
126.5926  
125.3759  
123.0375  
87.7849  
77.4145  
77.0602  
76.9063  
53.3521  
36.0164

20230616-zy1-86-21

196.6181

$^{13}\text{C NMR}$  (125 MHz,  $\text{CDCl}_3$ )

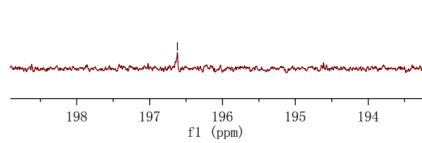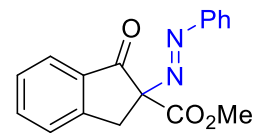

**5a**

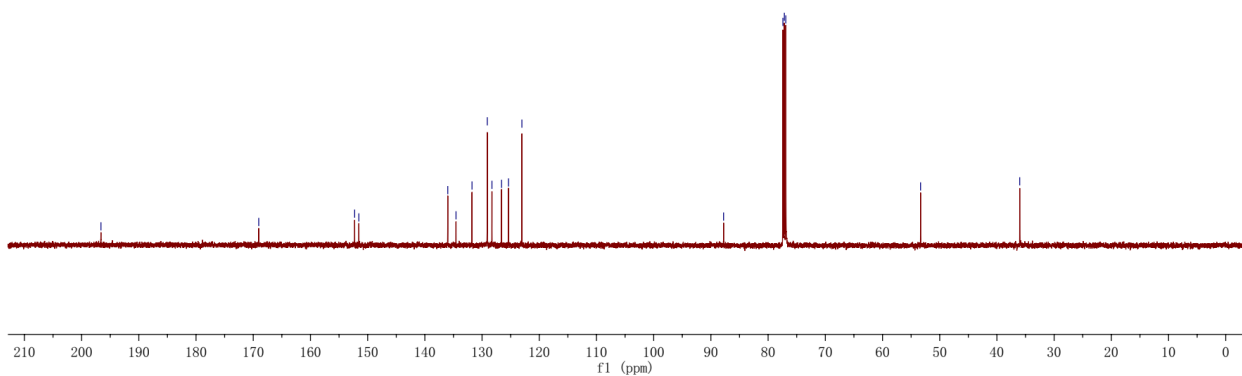

20220819-zy1-76-80

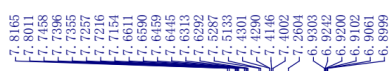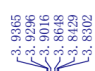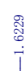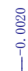

20220819-zy1-76-80

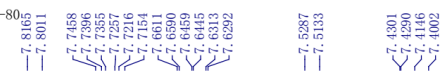

<sup>1</sup>H NMR (500 MHz, CDCl<sub>3</sub>)

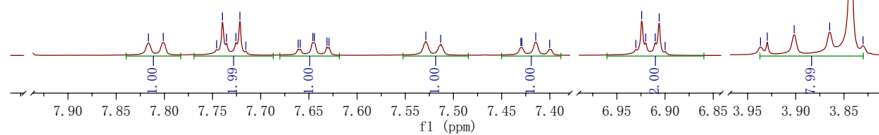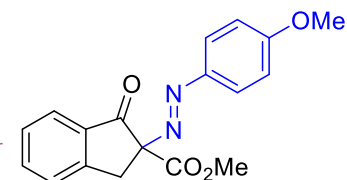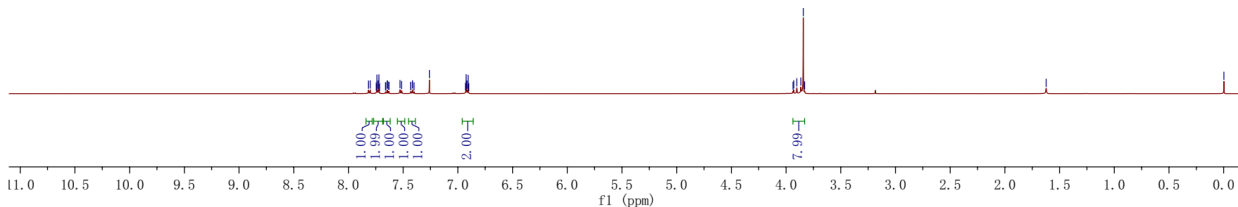

20230412-zy1-85-48

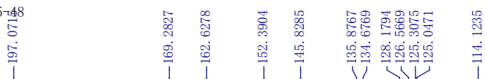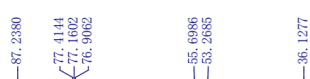

20230412-zy1-85-48

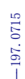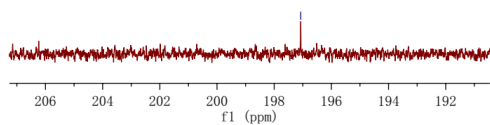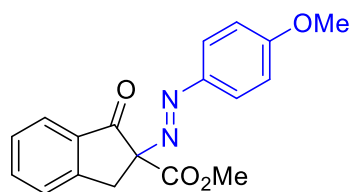

<sup>13</sup>C NMR (125 MHz, CDCl<sub>3</sub>)

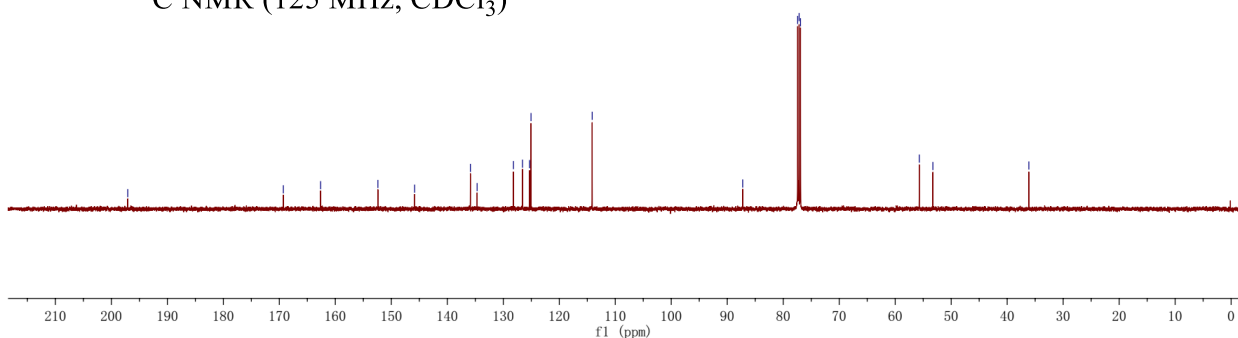

20230619-zy1-86-30

8.1124  
8.0968  
7.6351  
7.6167  
7.4999  
7.4817  
7.4696  
7.3817  
7.3453  
7.2397  
7.2274  
7.2212  
6.6029  
3.8465  
3.8344  
3.8074  
3.7989  
3.0368  
1.5728

20230619-zy1-86-30

8.1124  
8.0968  
7.6351  
7.6167  
7.4999  
7.4817  
7.4696  
7.3817  
7.3453  
7.2397  
7.2274  
7.2212  
6.6212  
6.6029  
3.8465  
3.8344  
3.8074  
3.7989

<sup>1</sup>H NMR (500 MHz, CDCl<sub>3</sub>)

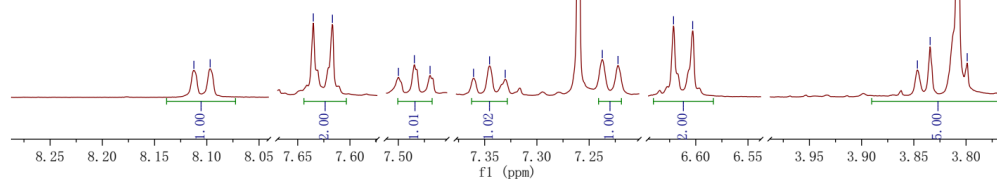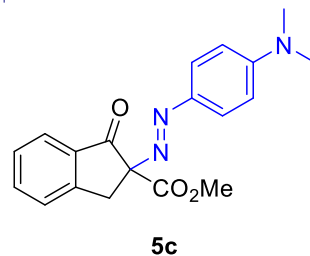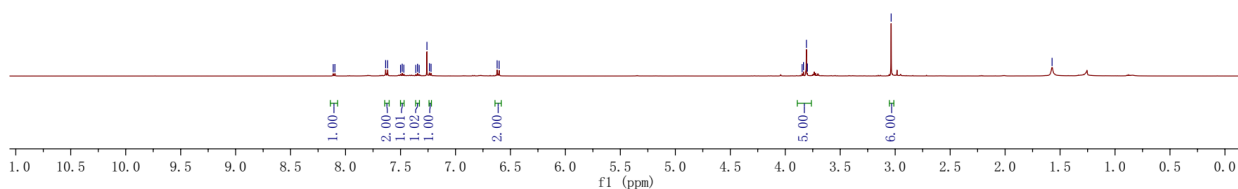

20230620-zy1-86-30

196.1019  
167.4030  
153.3417  
141.3023  
135.1234  
134.9210  
128.2372  
127.9486  
125.7638  
125.1644  
111.1554  
100.4863  
77.4137  
77.1588  
76.9055  
53.4071  
40.3347  
33.4275

20230620-zy1-86-30

196.1019  
167.4030  
153.3417  
141.3023  
135.1234  
134.2110  
129.9205  
127.9486  
125.7638  
125.1644

<sup>13</sup>C NMR (125 MHz, CDCl<sub>3</sub>)

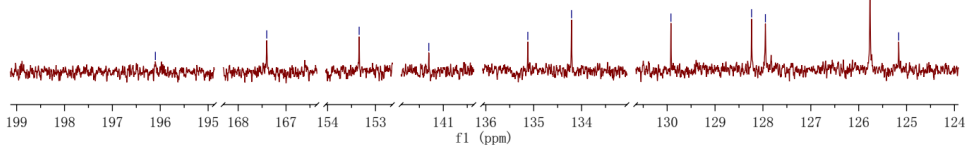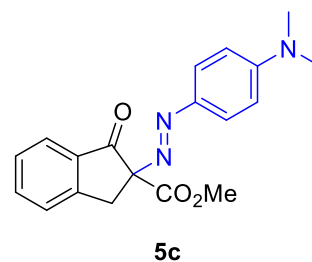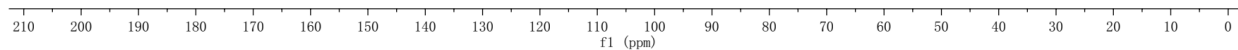

20230605-zy1-85-84

7.8190  
7.8036  
7.6628  
7.6612  
7.6434  
7.6304  
7.6304  
7.5922  
7.5147  
7.4322  
7.4172  
7.4024  
7.2327  
7.2164  
3.9442  
3.9042  
3.8727  
3.8487  
3.8379  
3.8379

2.3826  
1.6078

20230605-zy1-85-84

7.8190  
7.8036  
7.6628  
7.6612  
7.6434  
7.6304  
7.6304  
7.5922  
7.5147  
7.4322  
7.4172  
7.4024  
7.2599  
7.2327  
7.2164  
3.9442  
3.9042  
3.8727  
3.8487  
3.8379

<sup>1</sup>H NMR (500 MHz, CDCl<sub>3</sub>)

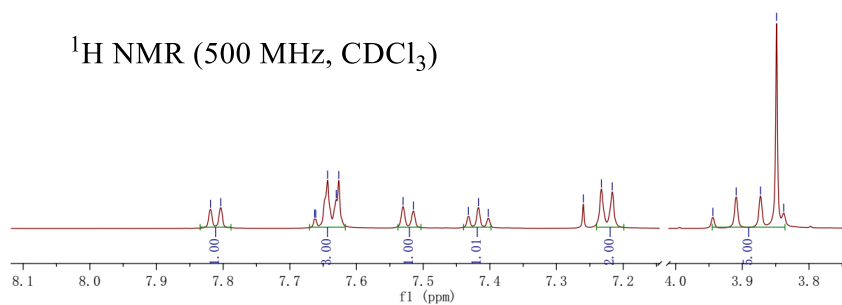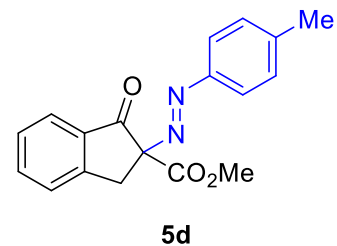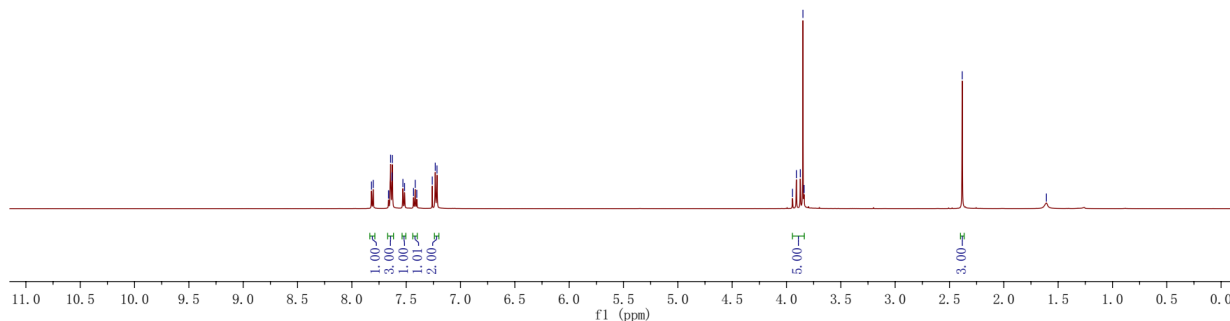

20230607-zy1-85-84

196.8494  
169.1504  
152.3347  
149.6401  
142.3910  
135.9221  
134.6053  
128.6889  
128.5172  
126.5172  
125.3306  
123.0519  
87.5590  
77.4137  
77.1587  
76.9056  
53.3041  
36.0251  
21.5883

20230607-zy1-85-84

196.8490

<sup>13</sup>C NMR (125 MHz, CDCl<sub>3</sub>)

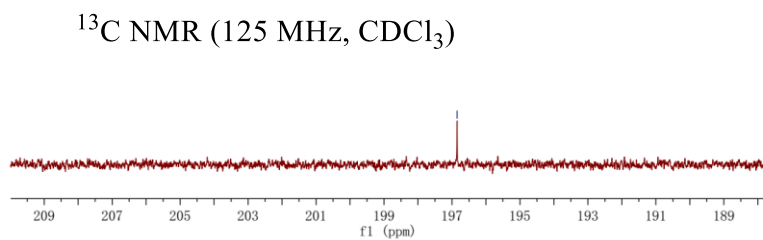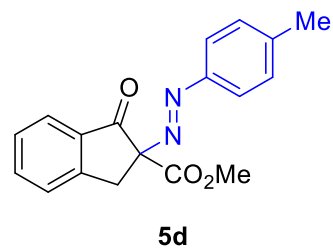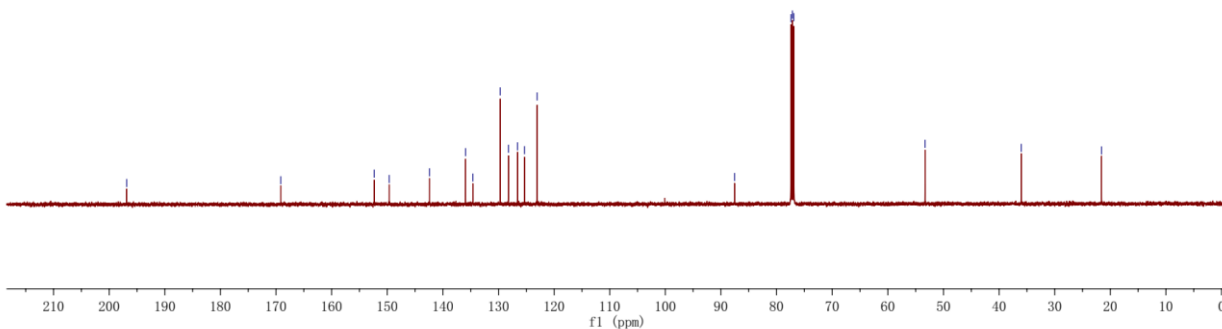

20230518-zy1-85-85

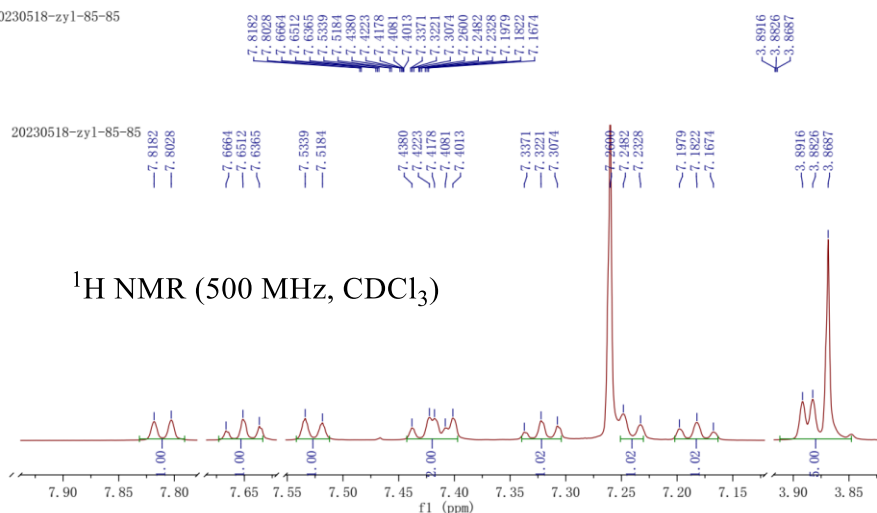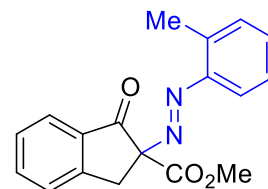

**5e**

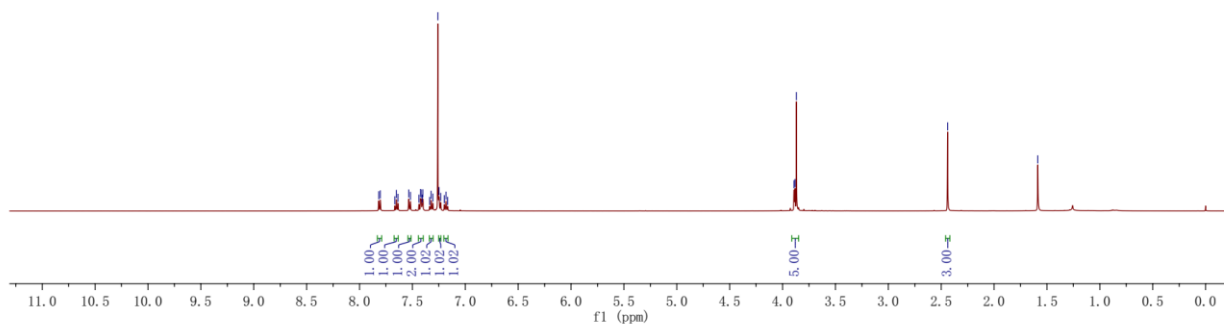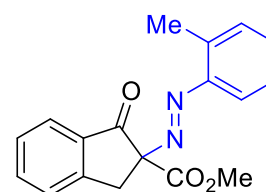

**5e**

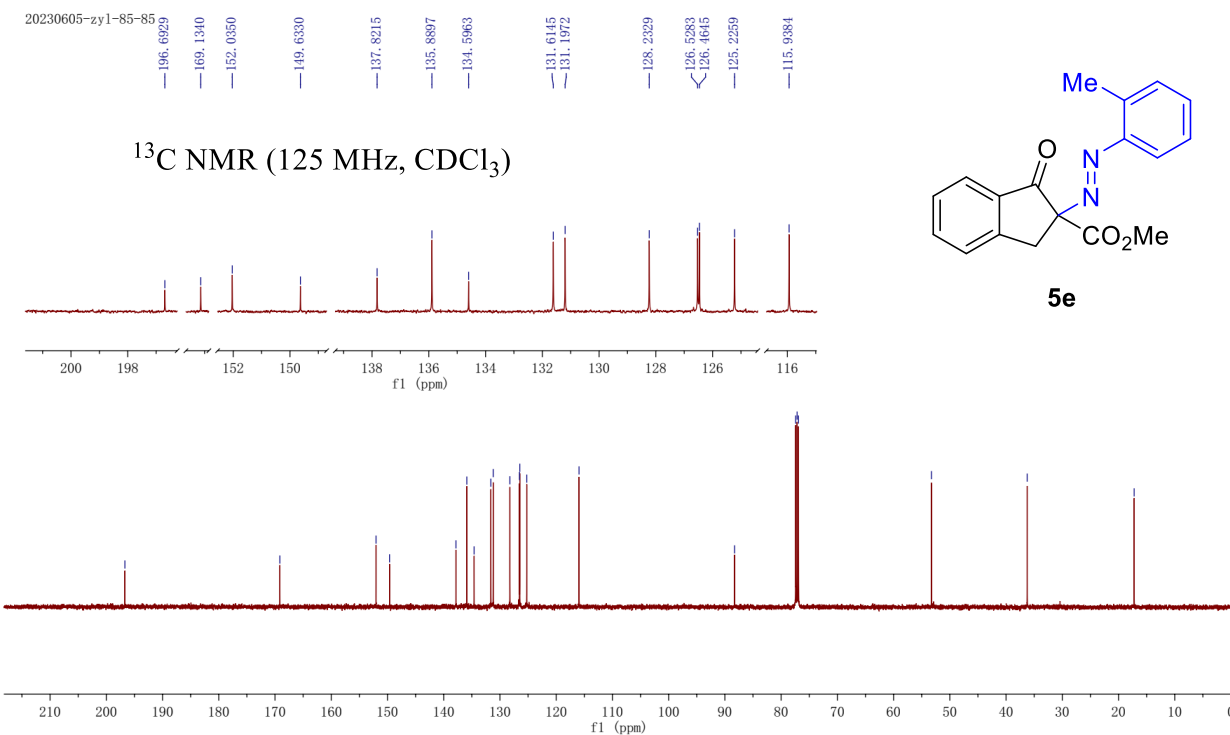

20230612-zy1-86-13

7.8184  
7.8030  
7.696  
7.682  
7.680  
7.681  
7.6834  
7.681  
7.5306  
7.5152  
7.4550  
7.4377  
7.4512  
7.4328  
7.416  
7.38  
7.4176  
7.4029  
3.9503  
3.9153  
3.8777  
3.8475  
3.8300  
1.5709  
1.3230

20230612-zy1-86-13

7.8184  
7.8030  
7.682  
7.680  
7.681  
7.6834  
7.5306  
7.5152  
7.4550  
7.4377  
7.4512  
7.4328  
7.416  
7.38  
7.4176  
7.4029  
7.2596  
3.9503  
3.9153  
3.8777  
3.8475  
3.8300

$^1\text{H NMR}$  (500 MHz,  $\text{CDCl}_3$ )

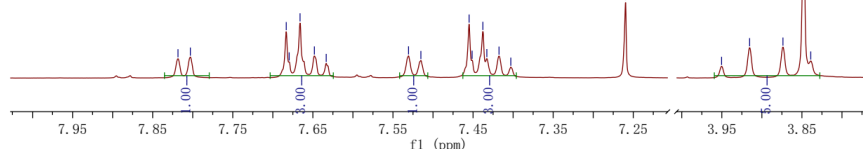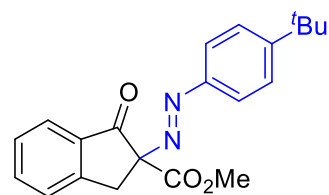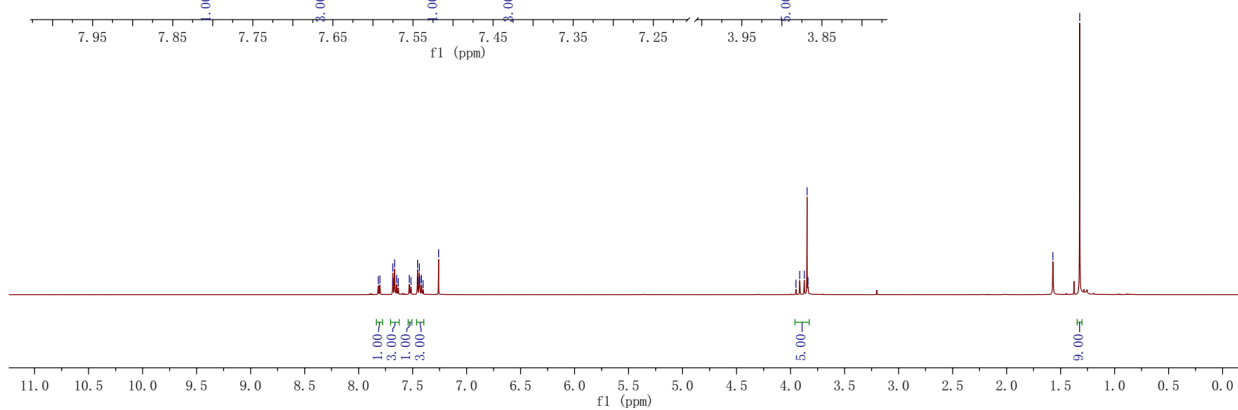

20230615-86-13

196.8223  
169.1639  
155.4490  
152.3013  
149.4427  
135.9122  
128.2183  
126.5796  
126.0025  
125.3229  
122.8172  
87.6439  
77.4142  
77.1603  
76.9063  
53.3141  
35.0176  
35.1455  
31.3388

$^{13}\text{C NMR}$  (125 MHz,  $\text{CDCl}_3$ )

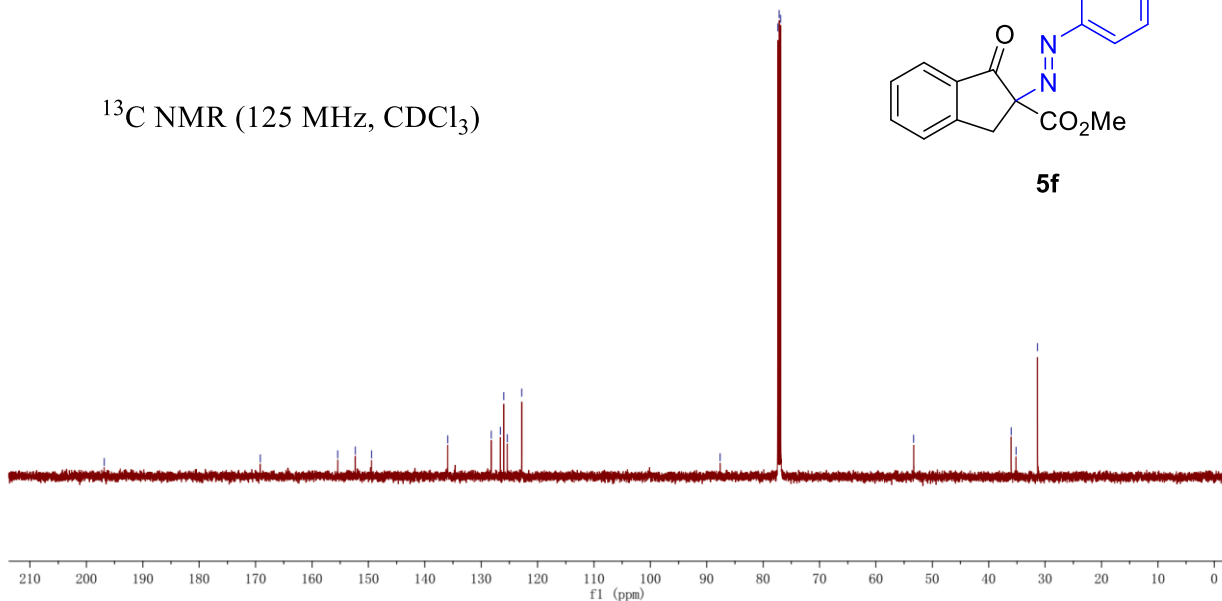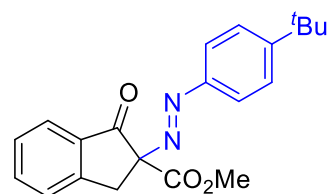

20230412-zyl-85-49

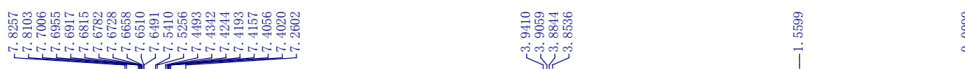

20230412-zyl-85-49

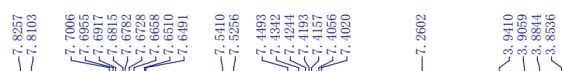 $^1\text{H NMR}$  (500 MHz,  $\text{CDCl}_3$ )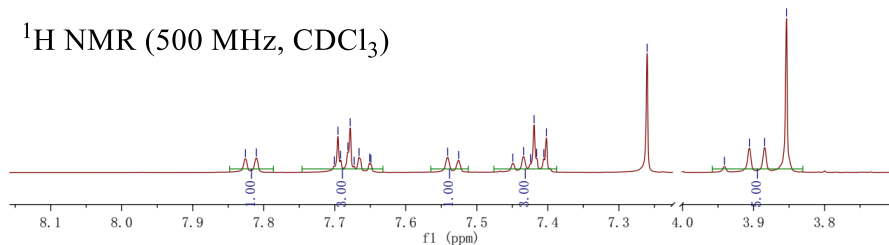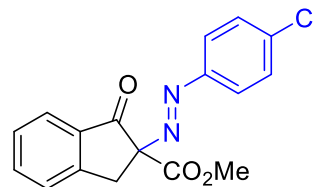**5g**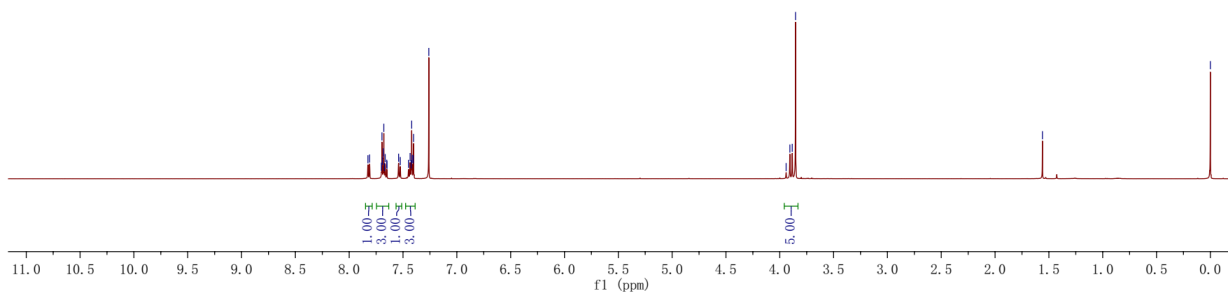

20230414-zyl-85-49

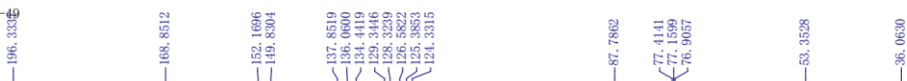

20230414-zyl-85-49

 $^{13}\text{C NMR}$  (125 MHz,  $\text{CDCl}_3$ )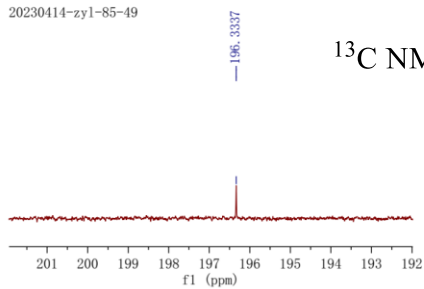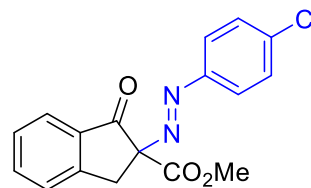**5g**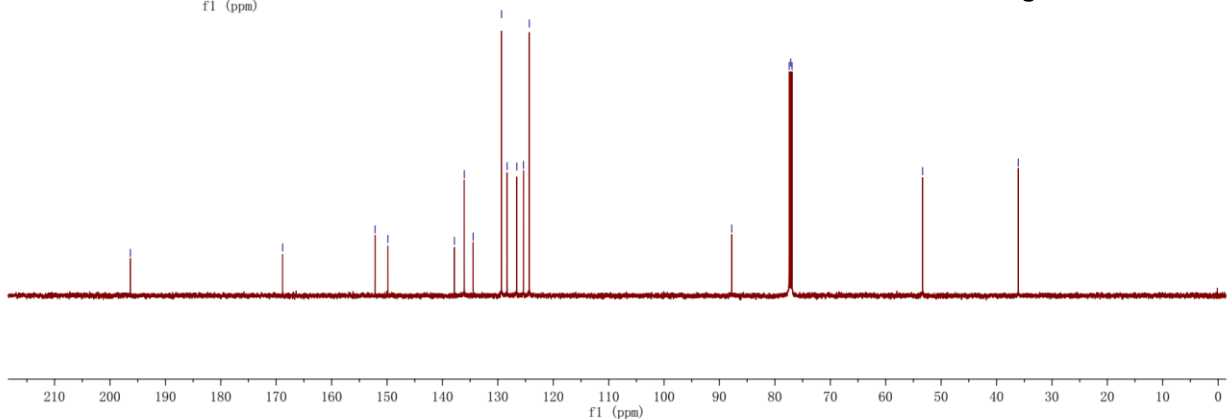



20230518-zy1-85-87

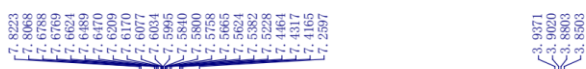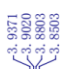

1.5883

20230518-zy1-85-87

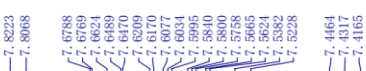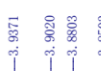<sup>1</sup>H NMR (500 MHz, CDCl<sub>3</sub>)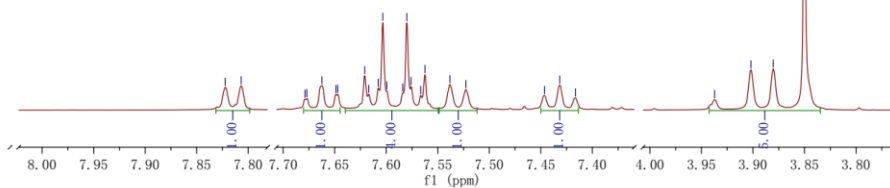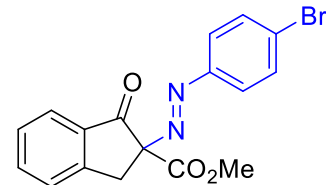

5h

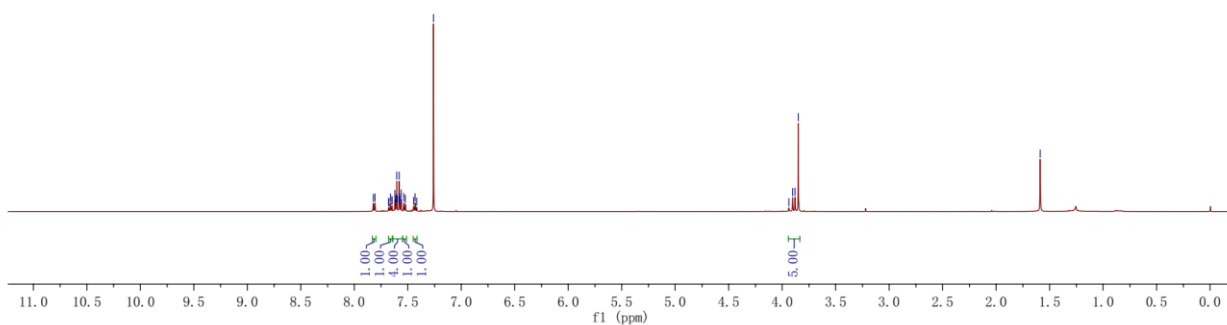

20230519-zy1-85-87

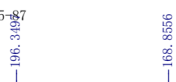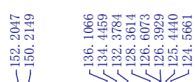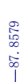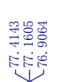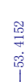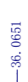

20230519-zy1-85-87

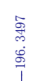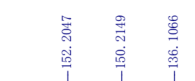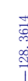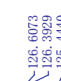<sup>13</sup>C NMR (125 MHz, CDCl<sub>3</sub>)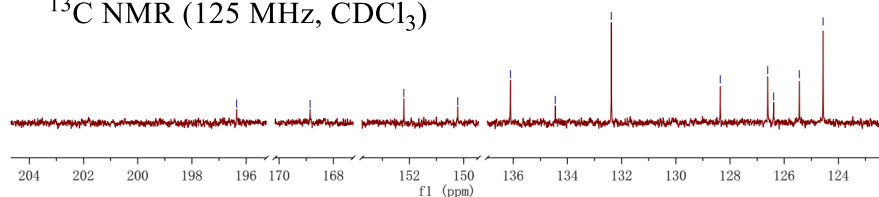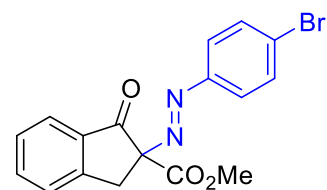

5h

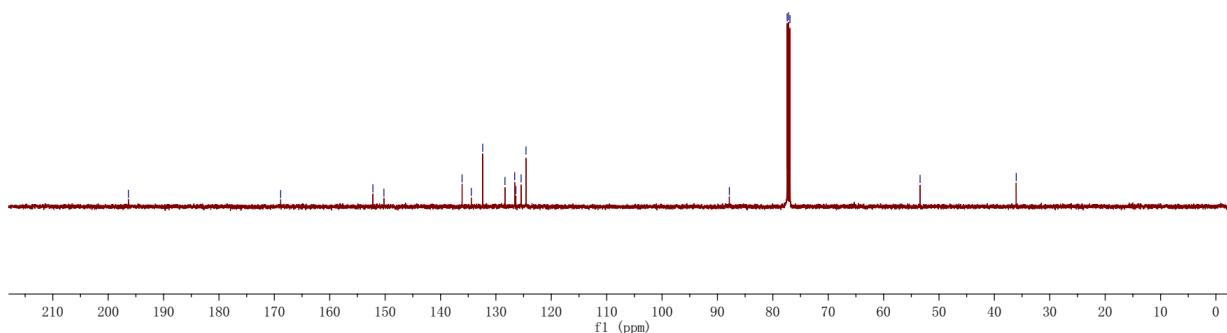

20230406-zy1-85-40

7.7535  
7.7419  
7.7373  
7.7351  
7.7315  
7.7296  
7.7221  
7.4404  
7.4358  
6.9446  
6.9368

3.9073  
3.8741  
3.8550  
3.8180  
3.7829

0.0020

20230406-zy1-85-40

7.7535  
7.7419  
7.7373  
7.7351  
7.7315  
7.7296  
7.7221

7.4404  
7.4358  
7.4266

7.2600

6.9491  
6.9446  
6.9368

3.9073  
3.8741  
3.8550  
3.8180  
3.7829

<sup>1</sup>H NMR (500 MHz, CDCl<sub>3</sub>)

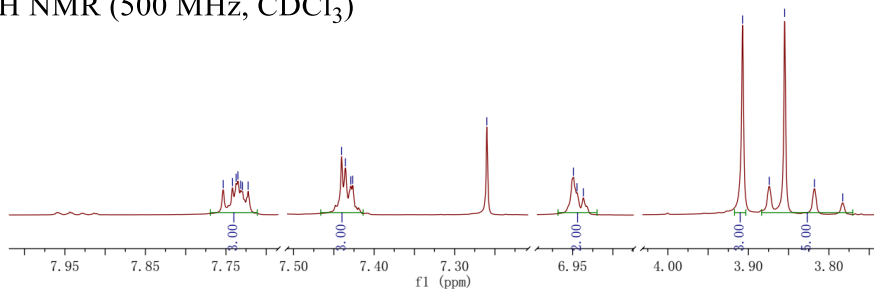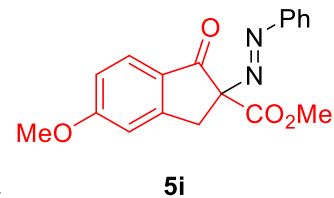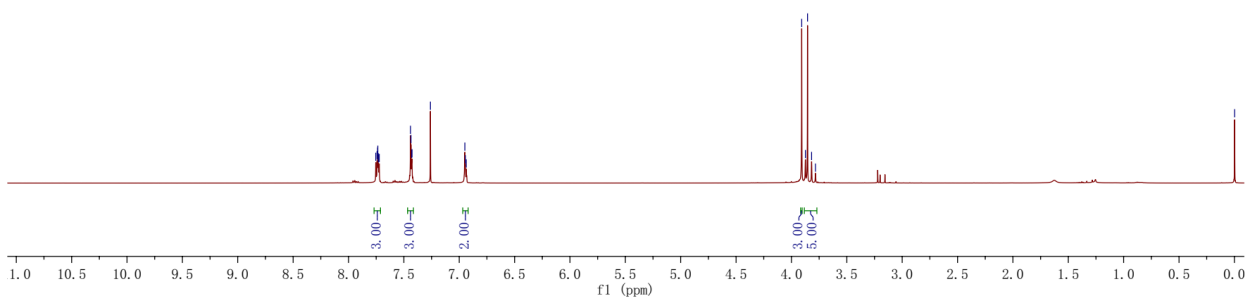

20230407-zy1-85-40

194.4600

169.2463  
166.3581

155.4528  
151.5786

131.6434  
129.0452  
127.9883  
127.1552  
123.0129

116.4185  
109.6979

88.1580

77.4147  
77.0000  
76.9085

55.9278  
53.2855

35.8215

<sup>13</sup>C NMR (125 MHz, CDCl<sub>3</sub>)

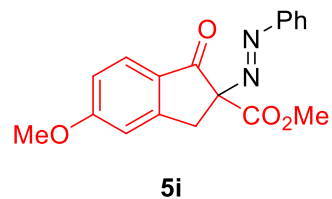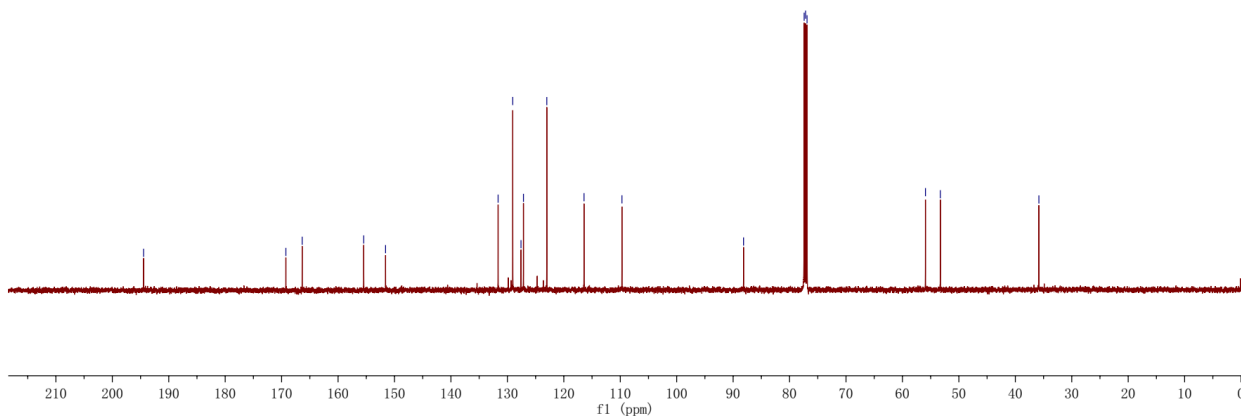

20230407-zy1-85-44

7.7482  
7.7312  
7.7236  
7.7187  
7.5307  
7.4502  
7.4387  
7.4136  
7.3964  
7.2663

3.9343  
3.8990  
3.8641  
3.8181

1.5891

0.0010

20230407-zy1-85-44

7.7482  
7.7312  
7.7236  
7.7187

7.5307

7.4502  
7.4387  
7.4136  
7.3964

3.9343

3.8990

3.8641

3.8181

<sup>1</sup>H NMR (500 MHz, CDCl<sub>3</sub>)

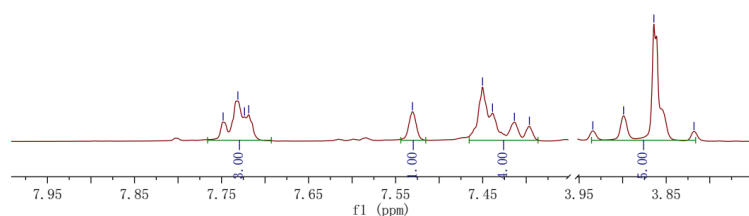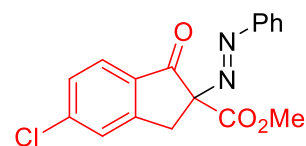

5j

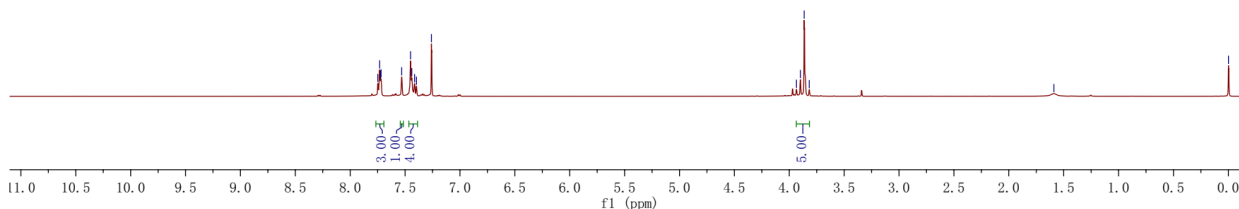

20230411-zy1-85-44

195.1781

168.6885

153.6761  
151.4440

142.6793

132.9427  
130.6973  
129.1706  
128.1385  
126.8553  
126.4117  
123.0820

87.7887

77.4136  
77.1586  
76.9056

53.4655

35.5701

20230411-zy1-85-44

195.1781

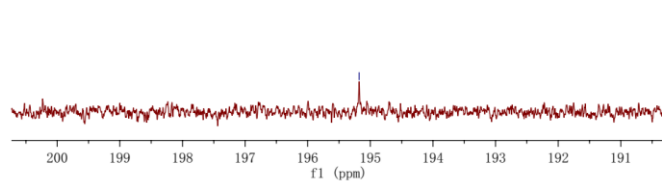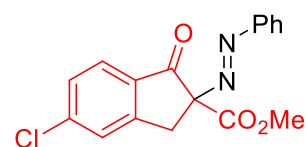

5j

<sup>13</sup>C NMR (125 MHz, CDCl<sub>3</sub>)

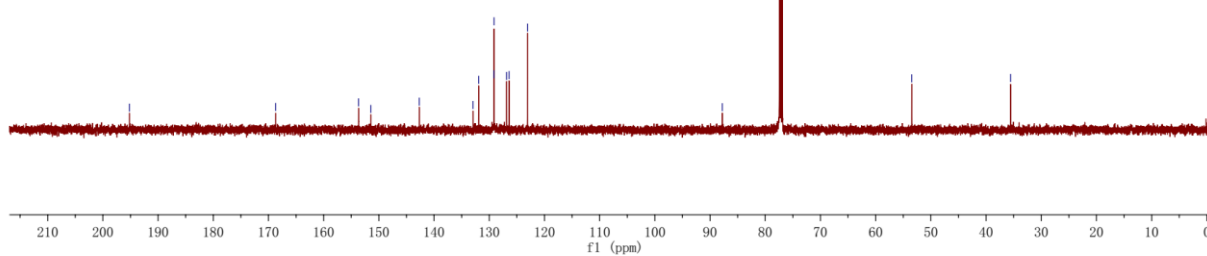

20230407-zy1-85-42

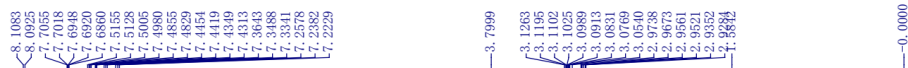

20230407-zy1-85-42

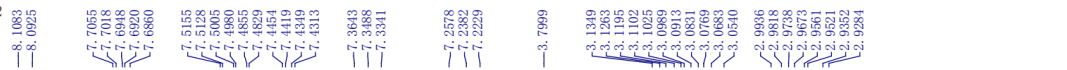

<sup>1</sup>H NMR (500 MHz, CDCl<sub>3</sub>)

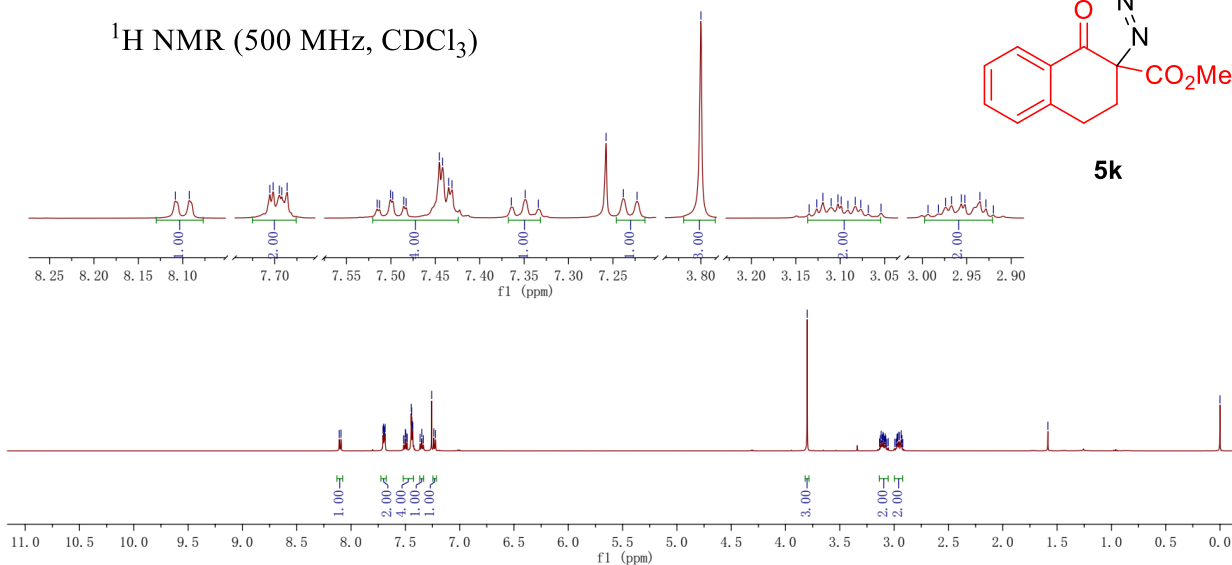

20230411-zy1-85-42

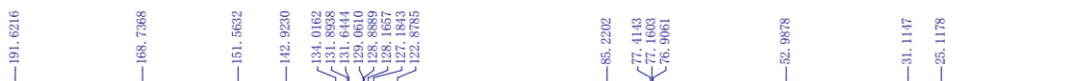

<sup>13</sup>C NMR (125 MHz, CDCl<sub>3</sub>)

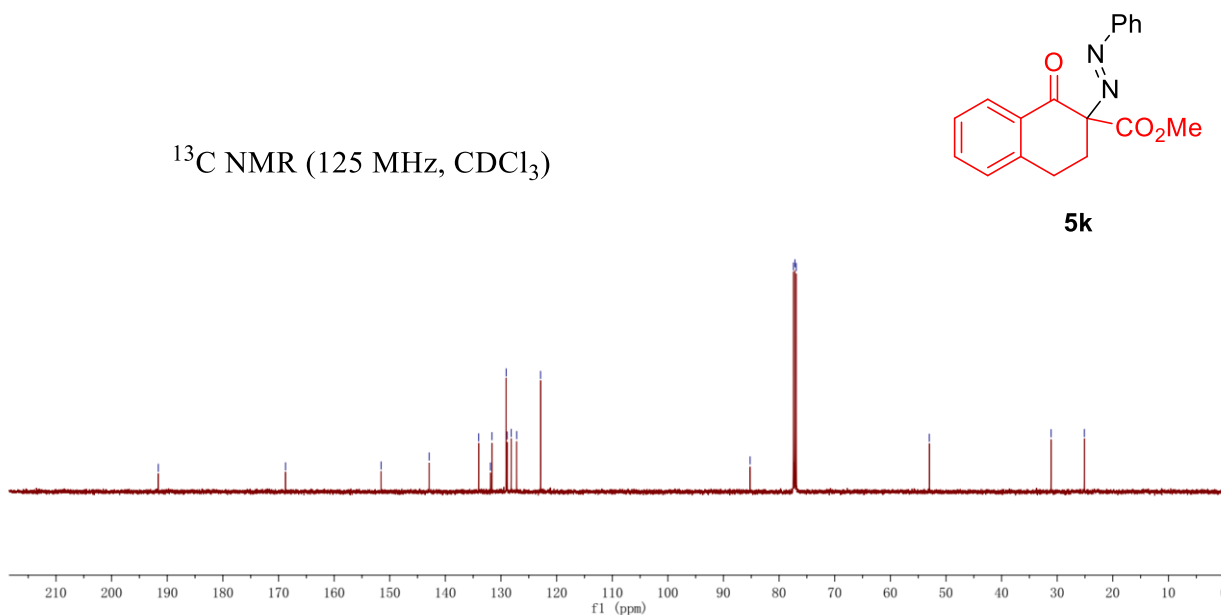

20230518-zyl-85-66

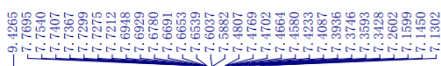

-0.0030

20230518-zyl-85-66

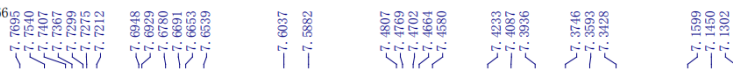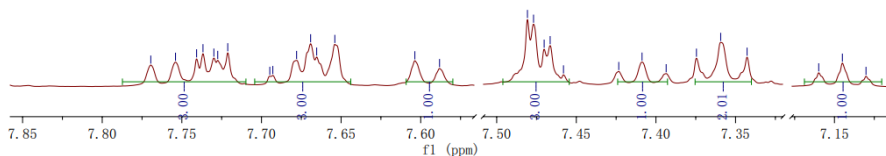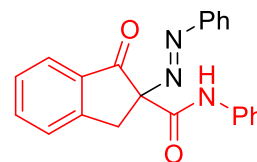

51

 $^1\text{H NMR}$  (500 MHz,  $\text{CDCl}_3$ )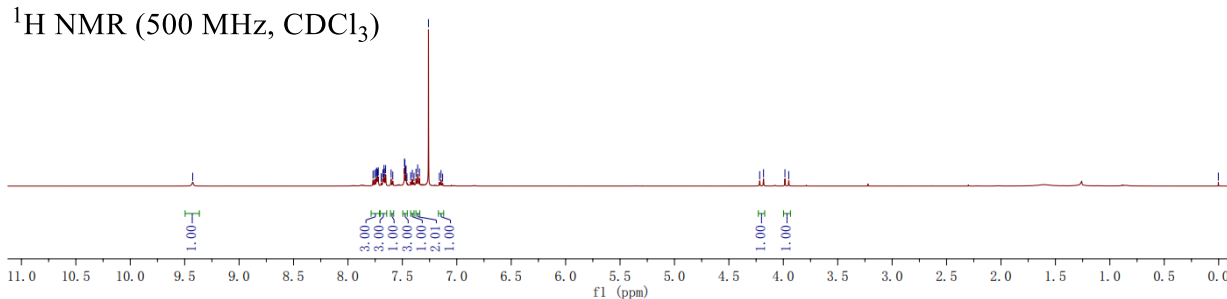

20230519-zyl-85-66

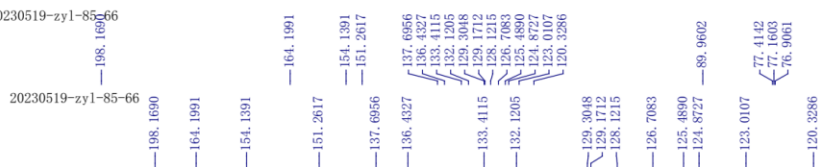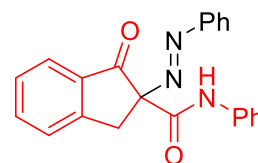

51

 $^{13}\text{C NMR}$  (125 MHz,  $\text{CDCl}_3$ )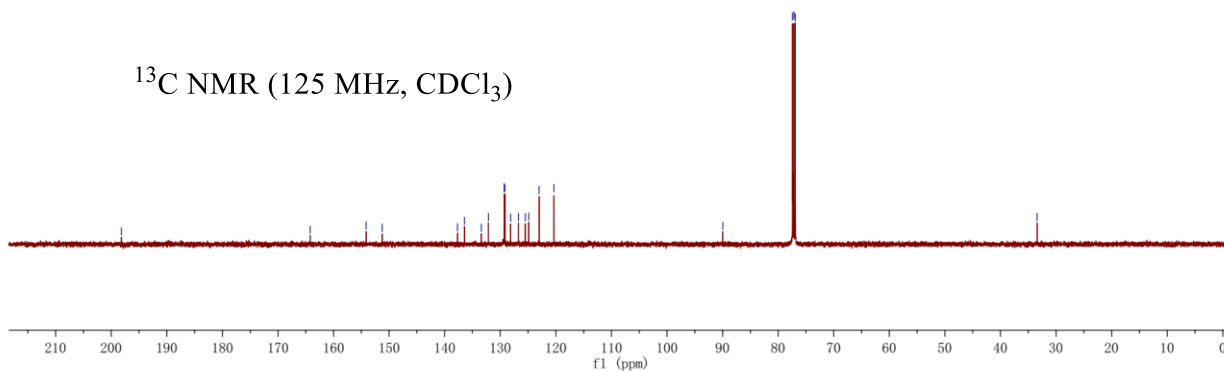

20230614-zyl-86-18

7.8250  
7.8096  
7.7350  
7.7309  
7.7240  
7.7156  
7.6665  
7.6367  
7.5381  
7.5227  
7.4471  
7.4398  
7.4358  
7.4290  
7.4259  
7.4219  
7.4072  
7.2598

4.3485  
4.3343  
4.3201  
3.9550  
3.9199  
3.8743  
3.8393

1.3068  
1.2926  
1.2783

20230614-zyl-86-18

7.8250  
7.8096

7.7350  
7.7309  
7.7240  
7.7156

7.6665  
7.6367

7.5381  
7.5227

7.4471  
7.4398  
7.4358  
7.4290  
7.4259  
7.4219  
7.4072

7.2598

4.3485  
4.3343  
4.3201

4.3059

3.9550  
3.9199

3.8743  
3.8393

<sup>1</sup>H NMR (500 MHz, CDCl<sub>3</sub>)

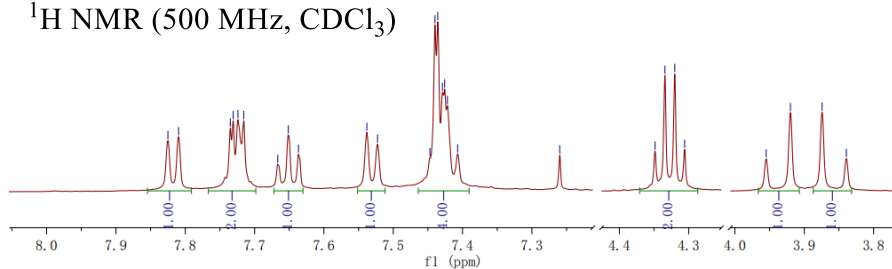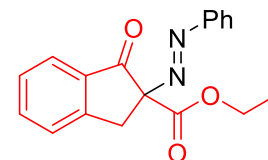

5m

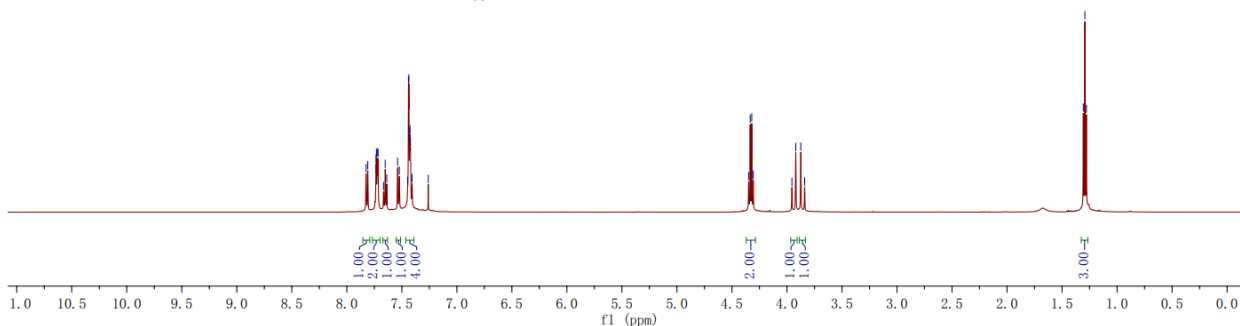

20230615-zyl-86-18

196.6838

168.5128

152.2635  
151.5681

135.6888  
131.6900  
131.6886

129.6536  
128.2108  
126.5668  
125.3082  
122.9842

87.6632

77.4144  
77.1600  
76.9059

62.4170

36.0496

14.2511

20230615-zyl-86-18

196.6838

<sup>13</sup>C NMR (125 MHz, CDCl<sub>3</sub>)

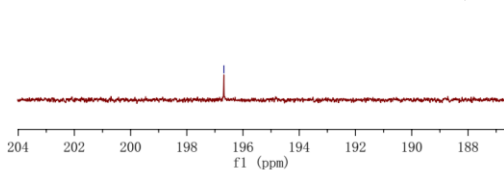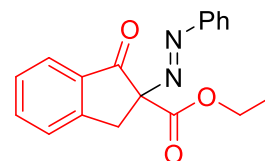

5m

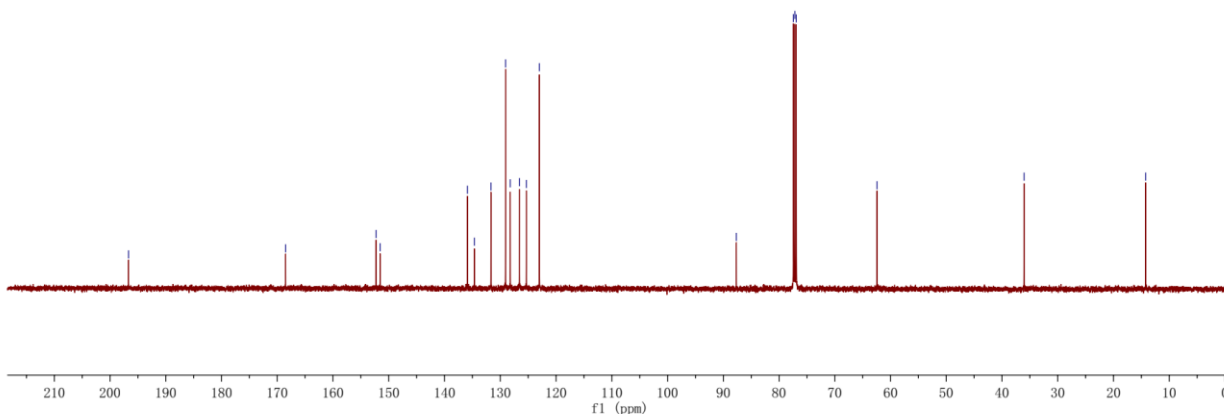

20230412-zyl-85-43

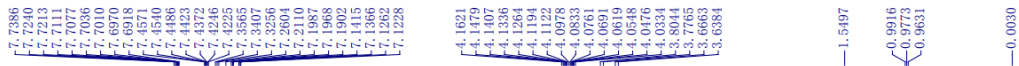

20230412-zyl-85-43

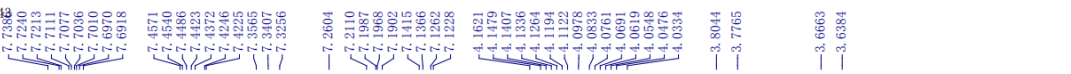 $^1\text{H}$  NMR (500 MHz,  $\text{CDCl}_3$ )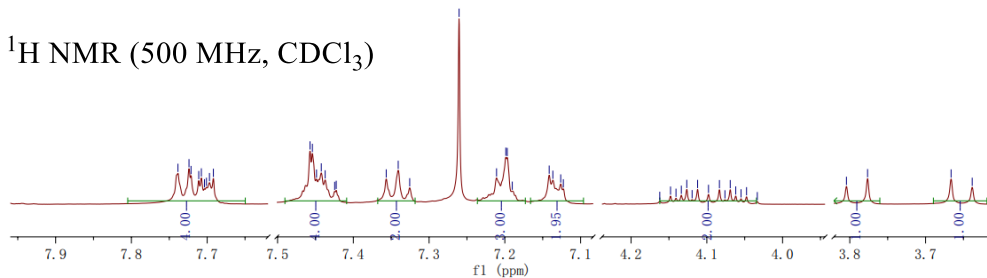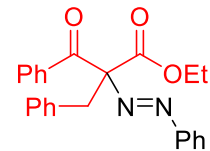

5n

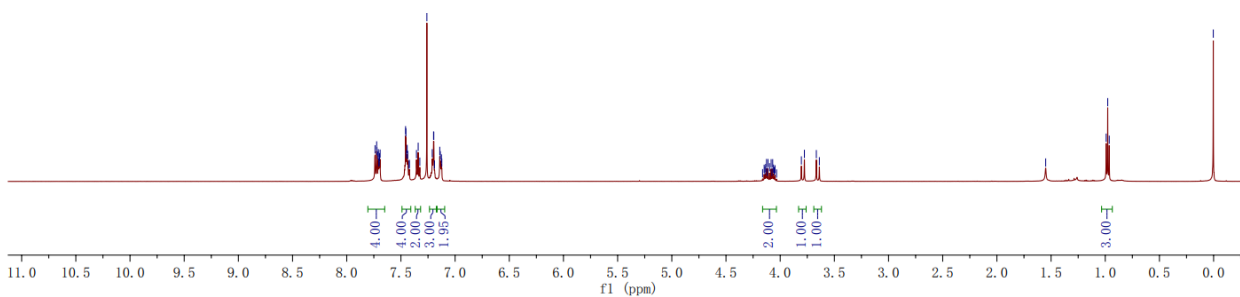

20230414-zyl-85-43

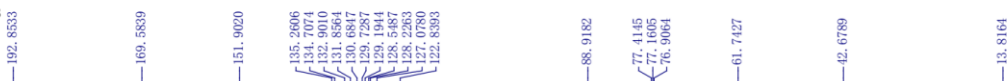 $^{13}\text{C}$  NMR (125 MHz,  $\text{CDCl}_3$ )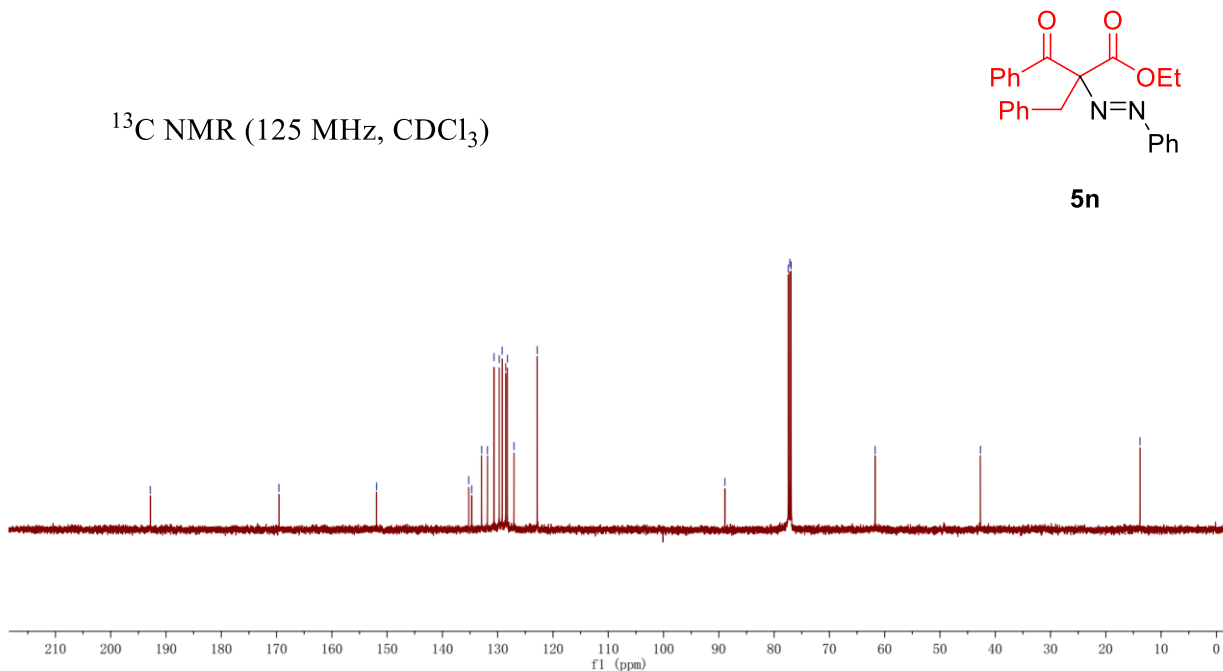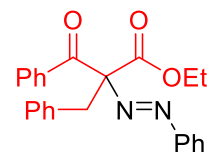

5n

20230612-zy1-86-12

7.7481  
7.7437  
7.7360  
7.7286  
7.4863  
7.4816  
7.4748  
7.4728  
7.4650  
7.2352  
7.2275  
7.2184  
7.2131  
7.1975

4.2819  
4.2747  
4.2676  
4.2604  
4.2532  
4.2462  
4.2393  
4.2319  
4.2250  
4.2178  
4.2108  
4.2035  
3.5808

2.342  
2.199  
2.054

20230612-zy1-86-12

7.7481  
7.7437  
7.7360  
7.7286

4.863  
4.816  
4.748  
4.728

4.2595  
4.2459  
4.2352  
4.2275  
4.2184  
4.2131  
4.1975

4.2819  
4.2747  
4.2676  
4.2604  
4.2532  
4.2462  
4.2393  
4.2319  
4.2250  
4.2178  
4.2108  
4.2035

<sup>1</sup>H NMR (500 MHz, CDCl<sub>3</sub>)

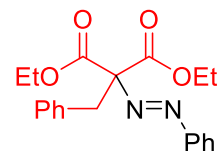

5o

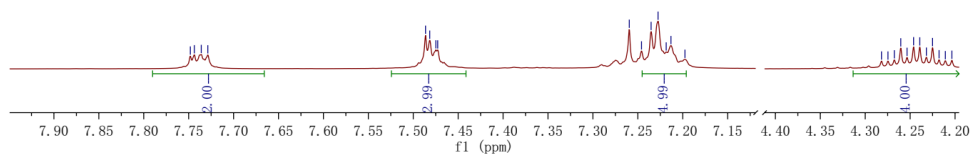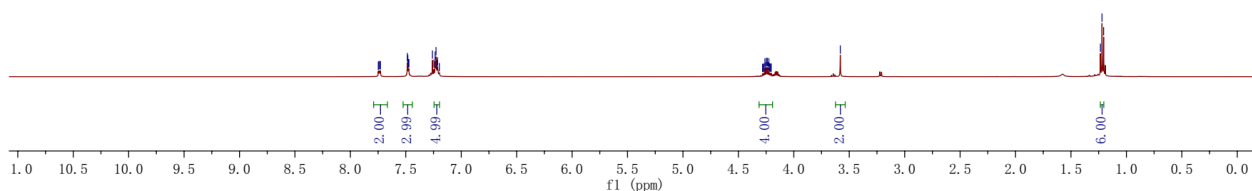

20230615-zy1-86-12

167.9985  
151.5909  
134.9908  
131.7750  
130.7912  
128.2037  
127.1456  
123.0288  
86.0588  
77.4139  
77.1507  
76.9057  
61.9139  
41.7035  
14.1506

20230615-zy1-86-12

134.9908  
131.7750  
130.7812  
129.1771  
128.2037  
127.1456  
123.0288

<sup>13</sup>C NMR (125 MHz, CDCl<sub>3</sub>)

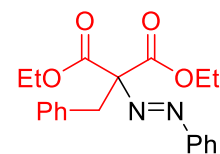

5o

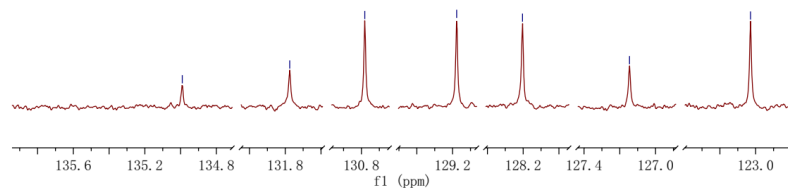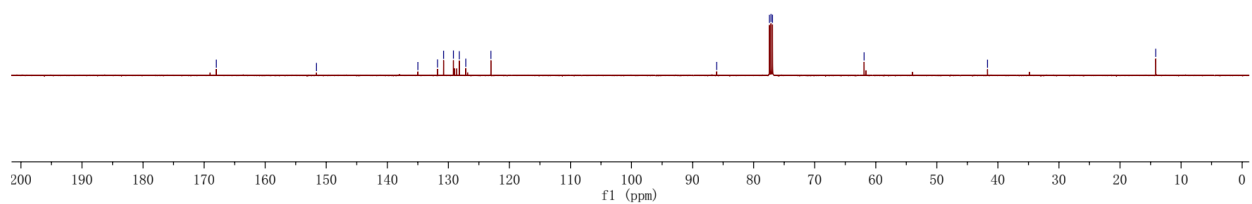



20220720-zy1-76-42

10.4676

7.8361  
7.8358  
7.8173  
7.8147  
7.5371  
7.5355  
7.5213  
7.4506  
7.4383  
7.4289  
7.4201  
7.2827  
7.2804  
7.2659  
7.2639  
7.2597  
7.2494  
7.2464  
7.2380  
7.2360  
7.2106  
7.2081  
7.1932  
7.1908  
6.9269  
6.9244  
6.9220  
6.9126  
6.9065  
6.8958  
6.8934

4.3104  
3.9433

1.6030

0.0040

20220720-zy1-76-42

7.8331  
7.8306  
7.8173  
7.8147

7.5371  
7.5355  
7.5213

7.4533  
7.4506  
7.4383

7.2827  
7.2804  
7.2659

7.2597  
7.2494  
7.2464

7.2380  
7.2360  
7.2106

7.2081  
7.1932  
7.1908

6.9269  
6.9244  
6.9220

6.9126  
6.9065  
6.8958

6.8934

 $^1\text{H NMR}$  (500 MHz,  $\text{CDCl}_3$ )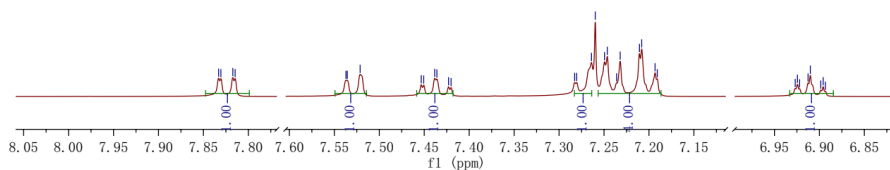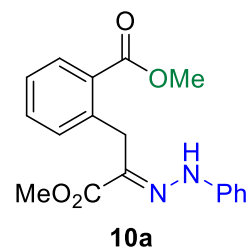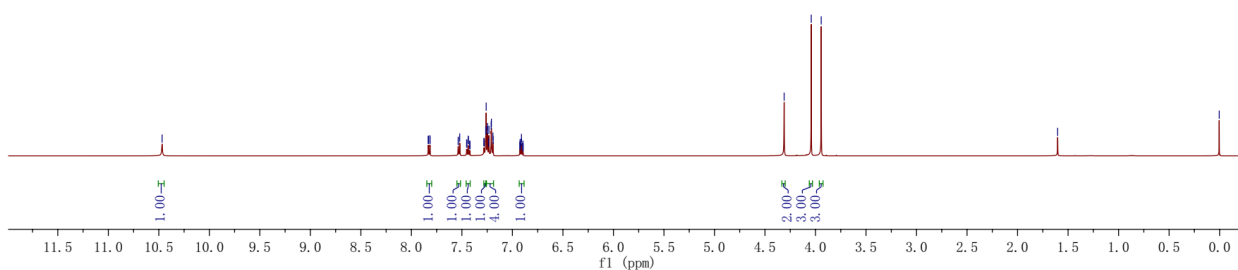

20230616-zy1-86-25

170.8002  
167.3585

143.7505  
138.0812

129.9911  
131.3824  
130.3544  
129.2706  
128.8504

114.1482

77.4143  
77.1603  
76.9062

53.0948  
52.6919

27.3818

20230616-zy1-86-25

143.7505

138.0812

132.9911  
132.4622  
131.3824  
130.3544  
129.2706  
128.8507

126.8701

121.8935

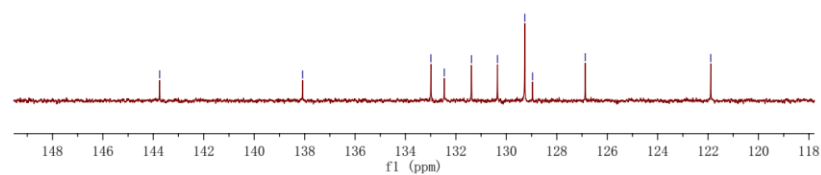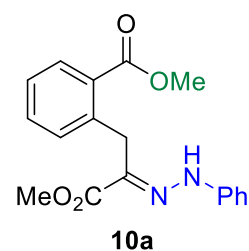 $^{13}\text{C NMR}$  (125 MHz,  $\text{CDCl}_3$ )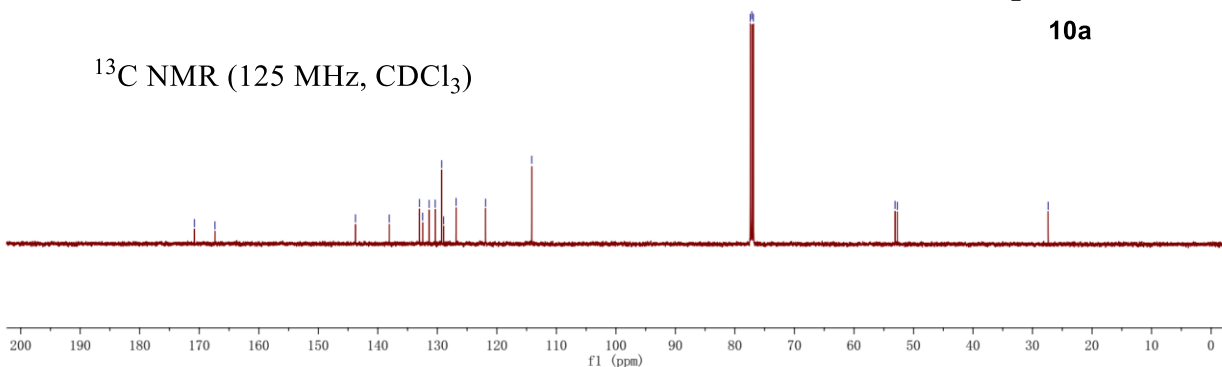

## References

- 1 Y. Zhao, X. Guo, S. Li, Y. Fan, G.-C. Ji, M. Jiang, Y. Yang, Y.-Y. Jiang, Transient Stabilization Effect of CO<sub>2</sub> in the Electrochemical Hydrogenation of Azo Compounds and the Reductive Coupling of  $\alpha$ -Ketoesters, *Angew. Chem., Int. Ed.*, 2022, **61**, e202213636.
- 2 Y. Xu, X. Yang, H. Fang, Additive- and Photocatalyst-Free Borylation of Arylazo Sulfones under Visible Light, *J. Org. Chem.*, 2018, **83**, 12831-12837.
- 3 J. Wen, R.-Y. Zhang, S.-Y. Chen, J. Zhang, X.-Q. Yu, Direct Arylation of Arene and N-Heteroarenes with Diaryliodonium Salts without the Use of Transition Metal Catalyst, *J. Org. Chem.*, 2012, **77**, 766–771.
- 4 D. L. Poeira, A. C. R. Negrão, H. Faustino, J. A. S. Coelho, C. S. B. Gomes, P. M. P. Gois, M. M. B. Marques, Hypervalent Iodine(III) Reagents with Transferable Primary Amines: Structure and Reactivity on the Electrophilic  $\alpha$ -Amination of Stabilized Enolates, *Org. Lett.*, 2022, **24**, 776–781.
- 5 I. Geibel, J. Christoffers, Synthesis of 1,4-Diketones from  $\beta$ -Oxo Esters and Enol Acetates by Cerium-Catalyzed Oxidative Umpolung Reaction, *Eur. J. Org. Chem.*, 2016, **2016**, 918–920.
- 6 Y. Z. Wang, Zheng, M. Lian, H. Yin, J. Zhao, Q. Meng, Z. Gao, Photo-organocatalytic enantioselective  $\alpha$ -hydroxylation of  $\beta$ -keto esters and  $\beta$ -keto amides with oxygen under phase transfer catalysis, *Green Chem.*, 2016, **18**, 5493–5499.
- 7 G. Gu, J. Lu, O. Yu, J. Wen, Q. Yin, X. Zhang, Enantioselective and Diastereoselective Ir-Catalyzed Hydrogenation of  $\alpha$ -Substituted  $\beta$ -Ketoesters via Dynamic Kinetic Resolution, *Org. Lett.*, 2018, **20**, 1888–1892.
- 8 Q.-Q. Zhao, J. Rehbein, O. Reiser, Thermoneutral synthesis of spiro-1,4-cyclohexadienes by visible-light-driven dearomatization of benzylmalonates, *Green Chem.*, 2022, **24**, 2772–2776.
- 9 M. J. Frisch, G. W. Trucks, H. B. Schlegel, G. E. Scuseria, M. A. Robb, J. R. Cheeseman, G. Scalmani, V. Barone, B. Mennucci, G. A. Petersson, H. Nakatsuji, M. Caricato, X. Li, H. P. Hratchian, A. F. Izmaylov, J. Bloino, G. Zheng, J. L. Sonnenberg, M. Hada, M. Ehara, K. Toyota, R. Fukuda, J. Hasegawa, M. Ishida, T. Nakajima, Y. Honda, O. Kitao, H. Nakai, T. Vreven, J. A., Jr. Montgomery, J. E. Peralta, F. Ogliaro, M. Bearpark, J. J. Heyd, E. Brothers, K. N. Kudin, V. N. Staroverov, T. Keith, R. Kobayashi, J. Normand, K. Raghavachari, A. Rendell, J. C. Burant, S. S. Iyengar, J. Tomasi, M. Cossi, N. Rega, J. M. Millam, M. Klene, J. E. Knox, J. B. Cross, V. Bakken, C. Adamo, J. Jaramillo, R. Gomperts, R. E. Stratmann, O. Yazyev, A. J. Austin, R. Cammi, C.

- Pomelli, J. W. Ochterski, R. L. Martin, K. Morokuma, V. G. Zakrzewski, G. A. Voth, P. Salvador, J. J. Dannenberg, S. Dapprich, A. D. Daniels, O. Farkas, J. B. Foresman, J. V. Ortiz, J. Cioslowski, D. J. Fox, Gaussian 09, Revision D.01; Gaussian, Inc., Wallingford, CT, 2013.
- 10 Y. Zhao, D. G. Truhlar, The M06 suite of density functionals for main group thermochemistry, thermochemical kinetics, noncovalent interactions, excited states, and transition elements: two new functionals and systematic testing of four M06-class functionals and 12 other functionals, *Theor. Chem. Acc.*, 2008, **120**, 215–241.
- 11 A. V. Marenich, C. J. Cramer, D. G. Truhlar, Universal Solvation Model Based on Solute Electron Density and on a Continuum Model of the Solvent Defined by the Bulk Dielectric Constant and Atomic Surface Tensions, *J. Phys. Chem. B*, 2009, **113**, 6378–6396.
- 12 K. Fukui, The path of chemical reactions - the IRC approach, *Acc. Chem. Res.*, 1981, **14**, 363–368.
- 13 C. Liu, Z.-X. Qin, C.-L. Ji, X. Hong, M. Szostak, Highly-chemoselective step-down reduction of carboxylic acids to aromatic hydrocarbons via palladium catalysis, *Chem. Sci.*, 2019, **10**, 5736–5742.
- 14 X.-Y. Chen, M. Pu, H.-G. Cheng, T. Sperger, F. Schoenebeck, Arylation of Axially Chiral Phosphorothioate Salts by Dinuclear Pd<sup>I</sup> Catalysis, *Angew. Chem., Int. Ed.*, 2019, **58**, 11395–11399.
- 15 J.-L. Yu, S.-Q. Zhang, X. Hong, Mechanisms and Origins of Chemo- and Regioselectivities of Ru(II)-Catalyzed Decarboxylative C–H Alkenylation of Aryl Carboxylic Acids with Alkynes: A Computational Study, *J. Am. Chem. Soc.*, 2017, **139**, 7224–7243.
- 16 L. Yang, M. Lei, M. Zhao, H. Yang, K. Zhang, H. Zhang, Y. Lia, Z. Lei, Synthesis of supramolecular polymer based on noncovalent “host–guest” inclusion complexation and its reversible self-assembly, *New J. Chem.*, 2016, **40**, 6825–6833.
- 17 A. Duran-Corbera, M. Faria, Y. Ma, E. Prats, A. Dias, J. Catena, K. L. Martinez, D. Raldua, A. Llebaria, X. Rovira, A Photoswitchable Ligand Targeting the  $\beta_1$ -Adrenoceptor Enables Light-Control of the Cardiac Rhythm, *Angew. Chem., Int. Ed.*, 2022, **61**, e202203449.
- 18 O. Renier, G. Bousrez, K. Stappert, M. Wilk-Kozubek, B. Adranno, H. Pei, E. T. Spielberg, V. Smetana, A.-V. Mudring, Photoisomerization and Mesophase Formation in Azo-Ionic Liquids, *Cryst. Growth Des.*, 2020, **20**, 214–225.

- 19 D. Bahulayan, L. John, M. Lalithambika, Modified Clays as Efficient Acid–Base Catalyst Systems for Diazotization and Diazocoupling Reactions, *Synth. Commun.*, 2003, **33**, 863-869.
- 20 O. K. Rasheed, P. Quayle, Azo Dyes: New Palladium- and Copper-Catalysed Coupling Reactions on an Old Template, *Synthesis*, 2018, **50**, 2608-2616.
- 21 R.-Y. Choi, C.-H. Lee, C.-H. Jun, Coupling Reagent for UV/vis Absorbing Azobenzene-Based Quantitative Analysis of the Extent of Functional Group Immobilization on Silica, *Org. Lett.*, 2018, **20**, 2972-2975.
- 22 L. Giampietro, A. Laghezza, C. Cerchia, R. Florio, L. Recinella, F. Capone, A. Ammazalorso, I. Bruno, B. D. Filippis, M. Fantacuzzi, C. Ferrante, C. Maccallini, P. Tortorella, F. Verginelli, L. Brunetti, A. Cama, R. Amoroso, F. Loiodice, A. Lavecchia, Novel Phenyldiazenyl Fibrate Analogues as PPAR  $\alpha/\gamma/\delta$  Pan-Agonists for the Amelioration of Metabolic Syndrome, *ACS Med. Chem. Lett.*, 2019, **10**, 545-551.
- 23 H. Valizadeh, A. Shomali, J. Ghorbani, S. Noorshargh, Synthesis of a nitrite functionalized star-like poly ionic compound as a highly efficient nitrosonium source and catalyst for the diazotization of anilines and subsequent facile synthesis of azo dyes under solvent-free conditions, *Dyes Pigments*, 2015, **117**, 64-71.
- 24 K. Haghbeen, E. W. Tan, Facile Synthesis of Catechol Azo Dyes, *J. Org. Chem.*, 1998, **63**, 4503-4505.
- 25 Z. Neuerov  $\acute{a}$  A. Lyčka.  $^{15}\text{N}$ ,  $^{13}\text{C}$  and  $^1\text{H}$  NMR study of tautomerism in 2-(phenyldiazenyl-4-substituted naphthalen-1-ols. Influence of substitution in passive components on azo-hydrazo tautomerism, *Dyes Pigments*, 2021, **188**, 109149.
- 26 N. A. Simeth, S. Crespi, M. Fagnoni, B. König, Tuning the Thermal Isomerization of Phenyloindole Photoswitches from Days to Nanoseconds, *J. Am. Chem. Soc.*, 2018, **140**, 2940-2946.
- 27 D. S. Barak, S. U. Dighe, I. Avasthi, S. Batra. Iodine-Catalyzed Diazenylation with Arylhydrazine Hydrochlorides in Air, *J. Org. Chem.*, 2018, **83**, 3537-3546.
- 28 Y. Li, B. O. Patrick, D. Dolphin, Near-Infrared Absorbing Azo Dyes: Synthesis and X-ray Crystallographic and Spectral Characterization of Monoazopyrroles, Bisazopyrroles, and a Boron–Azopyrrole Complex, *J. Org. Chem.*, 2009, **74**, 5237–5243.

- 29 J. B. Gilroy, S. D. J. McKinnon, B. D. Koivisto, R. G. Hicks, Electrochemical Studies of Verdazyl Radicals, *Org. Lett.*, 2007, **9**, 4837–4840.
- 30 M. Bancarz, E. Prack, M. K. Georges, Triphenyl verdazyl radicals' reactivity with alkyne carboxylates as a synthetic route to 1-(phenyldiazenyl)isoquinoline-3,4-dicarboxylates, *Tetrahedron Lett.*, 2012, **53**, 4026–4029.
- 31 A. Bamoniri, B. B. F. Mirjalili, N. Moshtael-Arani, Nano BF<sub>3</sub> SiO<sub>2</sub>: A green heterogeneous solid acid for synthesis of formazan dyes under solvent-free condition, *J. Mol. Catal. A: Chem.*, 2014, **393**, 272–278.
- 32 C. Liu, J. Lv, S. Luo, J.-P. Cheng, Sc(OTf)<sub>3</sub>-Catalyzed Transfer Diazenylation of 1,3-Dicarbonyls with Triazenes via N–N Bond Cleavage, *Org. Lett.*, 2014, **16**, 5458–5461.
